# Supplementary material for: Combining colour parameters and geochemical tracers to improve sediment source discrimination in a mining catchment (New Caledonia, South Pacific Islands)
Source: Copernicus journal article supplement (doi:10.5194/soil-2020-48), 2020-08-17
Supplement: Supplementary file [file soil-2020-48-RC1-supplement.pdf]

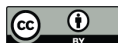

1    **Combining colour parameters and geochemical tracers to improve sediment source discrimination**  
2    **in a mining catchment (New Caledonia, South Pacific Islands)**

3    Virginie Sellier<sup>1</sup>, Oldrich Navratil<sup>2</sup>, John Patrick Laceby<sup>3</sup>, Cédric Legout<sup>4</sup>, Michel Allenbach<sup>5</sup>, Irène

4    Lefèvre<sup>1</sup>, Olivier Evrard<sup>1</sup>

5    <sup>1</sup>Laboratoire des Sciences du Climat et de l'Environnement (LSCE), UMR 8212 (CEA/CNRS/UVSQ-IPSL),  
6    Université Paris-Saclay, Gif-sur-Yvette (France)

7    <sup>2</sup> Laboratoire Environnement Ville Société (EVS), Université Lumière Lyon 2, UMR 5600 (CNRS), Lyon  
8    (France)

9    <sup>3</sup> Alberta Environment and Parks, Calgary, Alberta (Canada)

10    <sup>4</sup>Institut des Géosciences de l'Environnement (IGE), UMR 5001, Grenoble (France)

11    <sup>5</sup>LIVE-EA 4243, Université de Nouvelle-Calédonie & LABEX Corail, Nouméa (Nouvelle-Calédonie,  
12    France)

13    **Corresponding author:** [selliervirg@free.fr](mailto:selliervirg@free.fr) ; Tel: (33)673910072

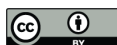

## 14           **Abstract**

15           Over the last century, human activities have induced significant land-cover changes that have  
16           accelerated soil erosion processes around the world. In New Caledonia, a French island located in the  
17           south-west Pacific Ocean, open-cast nickel mining has raised many concerns regarding its impact on  
18           riverine systems (i.e. hyper-sedimentation, overburden) and the island's ecosystems (i.e. flooding,  
19           lagoon siltation, water pollution).

20           A sediment tracing study has been conducted to quantify the contribution of mining versus  
21           non-mining sub-catchments in one of the first areas exploited for nickel mining, the Thio River  
22           catchment (397 km<sup>2</sup>). Sediment deposited during two cyclonic events (i.e. 2015 and 2017) was  
23           collected following a tributary design approach. Source (n= 24) and river sediment (n= 19) samples  
24           were analyzed by X-ray fluorescence and spectroscopy in the visible spectra (i.e. 365-735 nm). Four  
25           fingerprinting approaches based on (1) colour parameters, (2) geochemical properties, (3) colour  
26           parameters coupled with geochemical properties and (4) the entire visible spectrum were tested to  
27           estimate sediment source contributions.

28           The results demonstrated that the individual sediment tracing methods based on spectroscopy  
29           measurements (i.e. (1) and (4)) did not provide sufficient discrimination between sources. However,  
30           the inclusion of colour properties in addition to geochemical parameters (3) provided the highest  
31           discrimination between sources (i.e. 92.6 % of source variance explained). Although with a slightly  
32           lower discrimination potential (i.e. 83.1 % of variance explained in sources), the geochemical  
33           approach (2) provided similar results to those obtained with the colour coupled with geochemical  
34           approach (3). In addition, mixed linear models associated with these two approaches have been  
35           experimentally validated with artificial mixture samples. The results obtained with model (3) showed  
36           that mining source contributions strongly dominated the sediments inputs with a mean contribution  
37           of 68 % (SD 25 %) for the 2015 flood event and 88 % (SD 8%) for the 2017 flood event. These results  
38           suggest that catchment management should focus on the contributions of mining tributaries to



39 reduce sediment inputs in the river systems. Therefore, the use of these approaches based on  
40 geochemical properties individually (2) and coupled to colour parameters (3) could be extended to  
41 other mining catchments of New Caledonia but also to other similar nickel mining catchments  
42 around the world (e.g. Australia, Brazil, Dominican Republic, Cuba) to estimate sediment source  
43 apportionment.

44

45 **Keywords:** Nickel mining • Sediment source fingerprinting • Soil erosion • Modeling

46



## 47 Introduction

48 At the dawn of a fourth industrial revolution, demand for metalliferous minerals continues to  
49 increase and impact the world market (Prior et al., 2013;Highley et al., 2004). Currently, open-cast  
50 mining generates more than three-quarters of the world's metal ores. However, the extraction of  
51 these minerals is associated with deleterious impacts on the environment. In particular, these mines  
52 are responsible for the increase in soil erosion and the transfer of sediment in river systems  
53 worldwide (Yellishetty et al., 2013;Dumas et al., 2010;Abel et al., 2000).

54 New Caledonia, an island located in the south-western Pacific Ocean and currently the world's  
55 sixth-largest producer of nickel, is in particular challenged with the problems of hyper-sedimentation  
56 and over-burden of its river systems. Several studies outline how mining activities, which started in  
57 1875, are generally responsible for these deleterious river morphological changes (Bird et al.,  
58 1984;Iltis, 1992;Garcin et al., 2017). The excessive sediment inputs transferred mainly during  
59 extreme rainfall events (e.g. cyclones and tropical depressions) lead to the increased occurrence of  
60 flooding events in these tropical regions. Owing to the occurrence of major cyclones in New  
61 Caledonia (i.e. on average one cyclone every 2.7 years (Garcin, 2010)), the local population regularly  
62 have to deal with the damage generated by these flood events (e.g. damage to human settlements,  
63 public infrastructure, agricultural land and, human casualties). Moreover, the island's agricultural and  
64 fishing resources are also impacted.

65 Suspended sediment is known to transport large quantities of contaminants in river systems  
66 (Vaithiyathan et al., 1993;Bradley and Lewin, 1982). Hedouin et al. (2007), and more recently  
67 Baudrimont et al. (2019), observed high concentrations of trace metals, including Ni and Cr, in  
68 marine and freshwater organisms in New Caledonia. On a more global level, this anthropogenic  
69 activity also threatens the second largest coral reef in the world, listed as a UNESCO World Heritage  
70 In particular, the increased turbidity associated with sediment supply could disrupt coral metabolism  
71 (i.e. photosynthetic processes) (Juillot, 2019). These coral reefs provide an exceptional biological

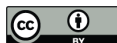

72 diversity and deliver several essential ecosystem services to the local population including fisheries,  
73 coastal protection and tourism (Pascal, 2010). The implementation of effective and perennial  
74 sediment control measures on mining sites (e.g. sediment retention basin, revegetation) is therefore  
75 required to reduce sediment inputs into the lagoon.

76 Erosion generated by open-cast nickel mining (i.e. mining bare soil, mining roads, mining  
77 prospection and mining waste) do not provide the only sediment source in New Caledonia's mining  
78 catchments. The use of fires to clear landscapes conducted by the local population for farming,  
79 pasture and hunting increase the area of bare soils (Dumas et al., 2010). Soils that are left uncovered  
80 by vegetation are more sensitive to erosion and they may be exposed to shallow landsliding (Blake et  
81 al., 2009; Smith et al., 2011). Moreover, several invasive species such as deers or wild pigs also  
82 threaten soil stability through trampling and overgrazing (Shellberg et al., 2010).

83 The contribution of mining tributaries (i.e. draining mining areas) and non-mining tributaries  
84 (i.e. draining areas without mining activities) to sediment transiting catchments in New Caledonia  
85 therefore needs to be discriminated. This discrimination has particularly become important since the  
86 mining industries are subject to the "polluter pays" principle applied since 1974. The obligation to  
87 fund remediation according to the extent of the damage generated by mining activity on the  
88 environment. There is therefore a real social, environmental and financial challenge in discriminating  
89 between sediment sources generated by mining activities and other potential sediment sources.

90 Sediment fingerprinting techniques have been developed since the 1970s to determine the  
91 spatial origin of sediment sources and quantify their contributions (Collins et al., 1996; Walling et al.,  
92 1979). These techniques are based on the analysis of multiple conservative properties both in the  
93 sediments and their potential sources. Fallout radionuclides (Wallbrink, 2004; Evrard et al.,  
94 2015; Wallbrink et al., 1998; Evrard et al., 2020), geochemical (Collins et al., 1997; Laceby and Olley,  
95 2015) and mineral properties (Klages and Hsieh, 1975; Walden et al., 1997) are the most frequently  
96 used tracers to quantify sediment source contributions. The use of fallout radionuclides and



geochemical properties as potential tracers was investigated to quantify the sources of suspended sediment in the Thio River catchment (397 km<sup>2</sup>), one of the first catchments in New Caledonia to be mined for nickel. Geochemical properties provided promising results (i.e. 83.1 % of variance explained in sources) while the fallout radionuclides proved to be unsuitable (i.e. non-discriminatory) (Sellier et al., 2019). However, other less expensive, faster and possibly more efficient techniques than the more conventional methods previously tested could be envisaged. For example, spectroscopy in the mid-infrared (MIR) (Poulenard et al., 2009), the visible near-infrared (VNIR) and the shortwave-infrared (SWIR) (Brosinsky et al., 2014) regions of spectra have been used to quantify the sediment source contributions. It is also non-destructive and requires low quantities of sample material. Spectroscopy could therefore meet both the need for a simple and rapid sediment tracing method in a context where flood events are frequent.

Moreover, New Caledonia has a specific geological feature which is at the origin of its mineral wealth: one third of its surface area is covered with peridotite massifs. The weathering of these rocks enriched in Fe and transition metals such as Mn, Ni, Cr and Co results in the formation of Ni- and Fe-rich smectite, serpentine, goethite and hematite. The oxidized minerals (i.e. goethite and hematite) provide a particularly reddish-orange colour to mining sources that distinguishes them from non-mining sources, which tend to be grey in colour. The differences made visually between the two sources further encourage the analysis of sources by spectroscopy and especially spectroscopy in the visible region of the spectrum (i.e. 365-735 nm). In particular, the colorimetric parameters derived from the visible spectrum have been shown to be effective in discriminating sediment sources. Their discrimination power has been tested both individually (Evrard et al., 2019; Martínez-Carreras et al., 2010; Uber et al., 2019) and in combination with other tracers (e.g. geochemical properties (Tiecher et al., 2015)) according to the conventional fingerprinting approach (i.e. statistical analysis and use of a mixing model). A more alternative approach based on the entire visible spectrum with the partial least square regression (PLSR) models has also been developed to trace origin of sediment sources in the literature (Legout et al., 2013; Tiecher et al., 2015).



As part of this study, four sediment fingerprinting methods based on (1) colour parameters, (2) geochemical properties, (3) colour parameters coupled with geochemical properties and (4) PLSR models based on the whole visible spectrum were tested in the Thio River catchment. Source (n=24) and river sediment (n=19) samples were collected following a tributary design approach and analyzed by X-ray fluorescence and spectroscopy in the visible spectra (i.e. 365-735 nm). The performance of each method to estimate sediment source contributions was evaluated in order to select the best technique to be applied in the Thio River catchment and possibly in other mining catchments of New Caledonia. On a wider scale, the tracers retained in this study could be considered as potential sedimentary tracers to estimate sediment source apportionment in other similar nickel mining catchments around the world (e.g. Australia, Brazil, Dominican Republic, Cuba).

## Materials and methods

### 1.1. Study area

Located in the southwestern Pacific Ocean, New Caledonia (18 500 km<sup>2</sup>) is made up of several islands, the largest of which is *La Grande Terre* (17 000 km<sup>2</sup>). The Thio River catchment (397 km<sup>2</sup>) is located on the east coast of this island (Figure 1-a). It has a mountainous relief, with an average altitude of 416 m above sea level (i.e. minimum: 0 m, maximum: 1392 m, Figure 1-a) and an average slope of 45%. Two dominant lithologies are present in the catchment: volcano-sedimentary formations mainly located on the western part of the catchment and peridotite massifs concentrated in the eastern part of the catchment. Cherts (22 %), sandstone (9 %), a mix of basalt, dolerite and gabbro (6 %), polymetamorphic rocks (6 %) mainly constitute volcano-sedimentary formations whereas peridotite massifs are composed of laterites (18 %), peridotites (17 %), serpentines (10 %) and hazburgites (1 %) (Garcin et al., 2017) (Figure 1-b). The Thio River catchment is covered on 96% of its surface by permanent vegetation. According to the mining registry, active and abandoned mining sites and exploration cover 21 % of the catchment area (Figure 1-c).



147       The Thio River catchment is subject to a tropical climate characterized by the alternation of a  
148   hot wet season (November-April; mean temperature of 27 °C) and a cooler dry season (May-October;  
149   mean temperature of 20 °C). The mean annual rainfall in the Thio River catchment is 1620 mm  
150   despite strong seasonal fluctuations with the highest levels of precipitation recorded during the  
151   cyclonic season between January and March (700 mm, 1981-2008; Alric (2009)). Although they only  
152   occur on average once every 2.7 years, cyclones or tropical depressions may supply more than 20 %  
153   of the annual rainfall in only one day according to local meteorological records (Météo France).

154  
155       Twelve major tributaries flow into the main stem of the Thio River (28 km long) (Figure 1-b).  
156   Ninety-two percent of the river channel length are characterized with slopes lower than 5 %.  
157   According to Surell's classification (Surell, 1984), the Thio River can be considered as torrential except in its  
158   estuarine section. In addition, the extensive bare soil surface associated with past mining activities  
159   (~10 sites), ongoing mining operations (e.g. 2 sites: Thio Plateau, Camps des Sapins) and the  
160   occurrence of 6 km<sup>2</sup> of mining roads exacerbate runoff production as they contribute to increased  
161   river network connectivity (Alric, 2009). This generates extensive erosion processes that are evident  
162   across the entire Thio catchment with the widespread occurrence of rills, gullies, landslides and  
163   channel bank erosion (Danloux and Laganier, 1991).

164

165



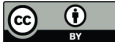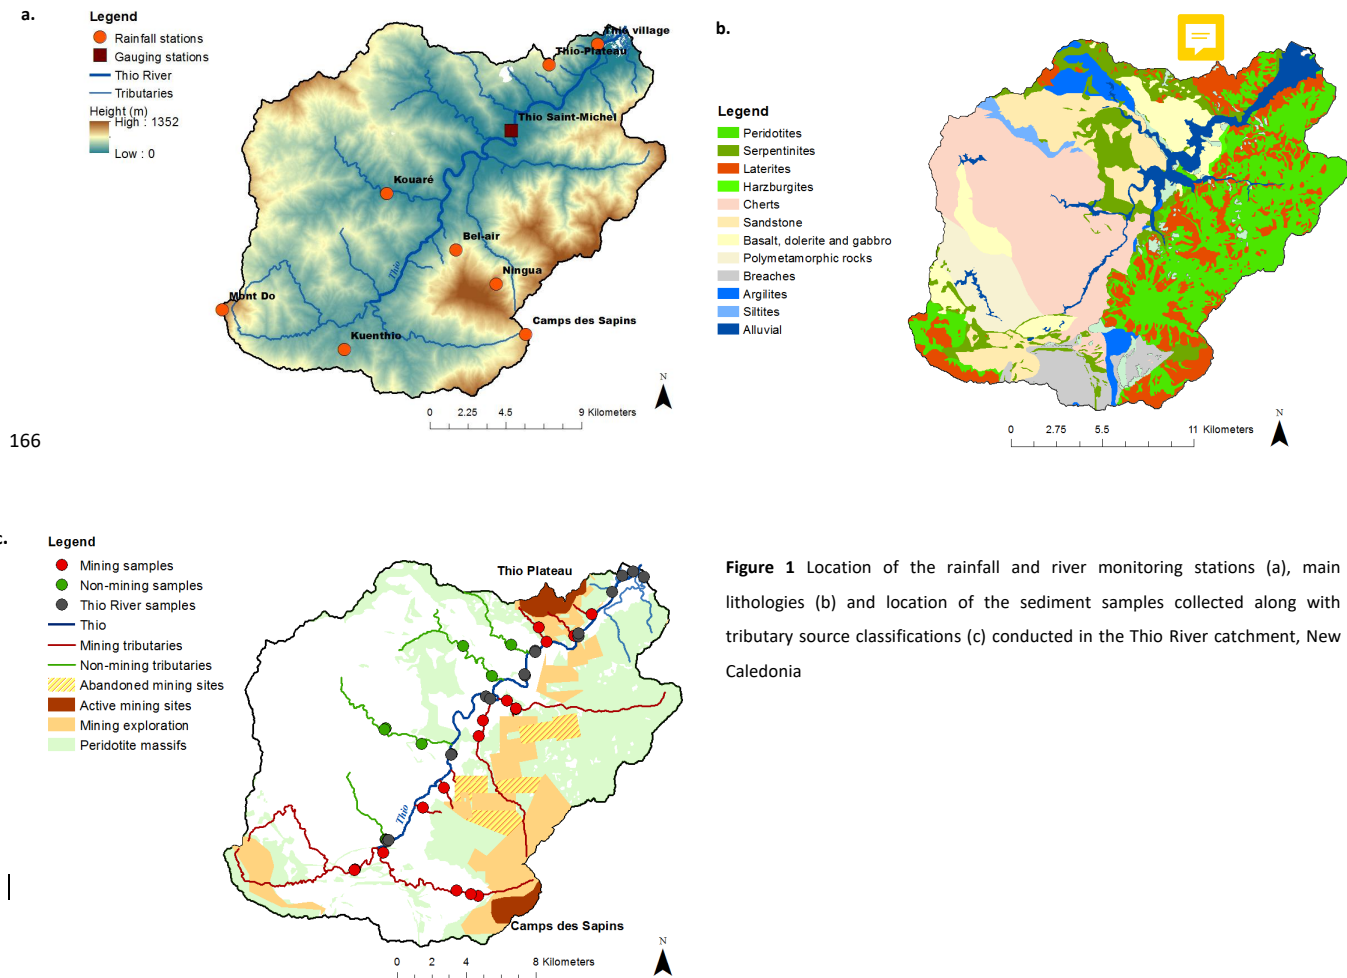

**Figure 1** Location of the rainfall and river monitoring stations (a), main lithologies (b) and location of the sediment samples collected along with tributary source classifications (c) conducted in the Thio River catchment, New Caledonia



## 1.2. Hydro-sedimentary monitoring

Three rainfall stations (Thio Plateau, Thio village, Camps des Sapins; Figure 1-b) are operated by Météo France and five others are managed by the DAVAR (Direction des Affaires Vétérinaires Alimentaires et Rurales; i.e. Kouaré, Bel-Air, Ningua, Kuenthio, Mont Do), with daily records available since 1952 for some stations (e.g. Thio village). Daily discharge has been monitored at a river gauging station located on the main stem of the Thio River (at Saint-Michel) since 1981 by the DAVAR (Figure 1-a).

## 1.3. Sources and river sediment sampling

To trace the origin of sediment, lag deposits were collected as an alternative of suspended sediment sampling on channel bars of mining tributaries ( $n = 16$ ), non-mining tributaries ( $n = 8$ ) and the Thio River ( $n = 19$ ) according to the tributary approach recommended by Laceby et al. (2017) (Figure 1-c). They were sampled after two major floods (~10 year return period): (1) the tropical depression of February 25, 2015 ( $n = 31$ ) and (2) Cyclone Cook on April 10, 2017, ( $n = 1$ ). These two sample sets were respectively sampled between April 30 and May 5, 2015 and between May 16 and May 17, 2017. At each sampling site, five to ten subsamples of fine sediment were collected across a 10 m<sup>2</sup> surface with a plastic trowel at exposed subaerial sites free of vegetation on channel bars. The subsamples were composited into one sample representative of the fine sediment deposited on the channel bars. The samples were oven-dried at 40°C for ~48 hours and sieved to 63 µm.

## 1.4. Preparation of artificial mixture samples

Equal quantities of all mining source samples ( $n = 16$ ) were collected and mixed together to create a composite sample of mining sources. The same process was carried out with non-mining source samples ( $n = 8$ ). The two composite samples respectively corresponding to mining and non-mining sources were then mixed in known proportions to create artificial mixture samples ( $n = 21$ , 0-100 % with a 5 % step, Table 1).



**Table 1** Proportions of mining and non-mining sources (%) in artificial mixture samples ( $M_i$ ).  $M_6$  was withdrawn from this study because an error occurred at the time of its completion (out of study).

| $M_i$ | Proportions of mining sources (%) | Proportions of non-mining sources (%) |
|-------|-----------------------------------|---------------------------------------|
| M1    | 0                                 | 100                                   |
| M2    | 5                                 | 95                                    |
| M3    | 10                                | 90                                    |
| M4    | 15                                | 85                                    |
| M5    | 20                                | 80                                    |
| M6    | 25 (out of study)                 | 75 (out of study)                     |
| M7    | 30                                | 70                                    |
| M8    | 35                                | 65                                    |
| M9    | 40                                | 60                                    |
| M10   | 45                                | 55                                    |
| M11   | 50                                | 50                                    |
| M12   | 55                                | 45                                    |
| M13   | 60                                | 40                                    |
| M14   | 65                                | 35                                    |
| M15   | 70                                | 30                                    |
| M16   | 75                                | 25                                    |
| M17   | 80                                | 20                                    |
| M18   | 85                                | 15                                    |
| M19   | 90                                | 10                                    |
| M20   | 95                                | 5                                     |
| M21   | 100                               | 0                                     |

### 1.5. Source, river sediment and artificial mixture sample analyses

A portable diffuse reflectance spectrophotometer (Konica Minolta 2600d) was used to measure the spectra in the visible (365–735 nm with a 10-nm resolution, 39-wavelength class) of Thio River sediment ( $n = 19$ ), tributary source ( $n = 16$ ) and artificial mixture samples ( $n = 20$ ). Sample quantities between 0.1 g and 4 g were stored in 60 mL polystyrene tubes and analyzed at the Institut des Géosciences de l'Environnement (IGE, Grenoble, France). Because of the rather small measuring area (i.e. 3-mm radius circle), and to take into account the possible heterogeneity within the samples, three measurements were carried out on river sediment and sources samples. For artificial mixture samples, the experimenter who conducted the analyses carried out four measurements. Several parameters (i.e. D65 illuminant, 10° angle observer and specular component excluded) were

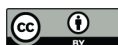

206 applied for each measurement. Raw data collected corresponds to the spectral reflectance  
 207 percentage for each of the 39-wavelength class. From these raw data, 15 variables of various  
 208 colorimetry models were derived. Among these components, XYZ tri-stimulus values were calculated  
 209 based on the colour-matching functions defined by the International Commission on Illumination (CIE  
 210 1931). The standardized tri-stimuli were then converted into CIELab and CIELu'v' cartesian coordinate  
 211 systems using the equations provided by CIE (1976) and then into CIELch, CIEL\*a\*b\* cartesian  
 212 coordinate systems using the equations provided by CIE (1994) (Rossel et al., 2006). First Derivative  
 213 reflectance of the Visible Spectra (FDVS) of each sample was also derived from the initial reflectance  
 214 spectrum. According to Tiecher et al. (2015), the use of FDVS avoids differences in baseline positions  
 215 and to get rid of the small differences due to uncontrolled sources of variation, as sample packaging.

216 Measurements of 11 geochemical elements (i.e. Mg, Al, Si, K, Ca, Ti, Cr, Mn, Fe, Ni and Zn) on  
 217 the samples were conducted by pre-calibrated energy dispersive X-ray fluorescence spectrometry  
 218 (Epsilon 3, Malvern PANalytical) with certified reference samples including Internal Atomic Energy  
 219 Agency (IAEA) standards ( $r^2 = 0.90-0.99$ , mean relative error: 9%, SD 8 %, minimum: 1%, maximum:  
 220 23%). Between 0.2 and 0.5 g of the samples were packed in small mass holder (SMH) cells with an air  
 221 double X-ray Mylar film and analyzed at the Laboratoire des Sciences du Climat et de  
 222 l'Environnement (LSCE, Gif-sur-Yvette, France). Samples were irradiated with a primary beam  
 223 generated by an Rh anode X-ray tube emitting electromagnetic waves between 100eV and 1MeV  
 224 with a maximum power, typical current and voltage fixed to 15 W, 3mA and 50 kV respectively. The  
 225 associated Si-drift detector had a Be window thickness of 8  $\mu\text{m}$  and recorded the sample spectrum in  
 226 a 2D optical geometry configuration. X-ray intensities were converted into concentrations using the  
 227 Epsilon 3 software program through the application of the fundamental parameters method.

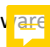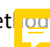



## 228 1.6. Statistical analysis and sediment tracing

### 229 1.6.1. Conventional mixing model

230 In general, the sediment source fingerprinting approach is composed of four main steps: (1)  
 231 range test, (2) the Mann-Whitney U test, (3) a stepwise discriminant function analysis and (4) a  
 232 mixing model (Collins et al., 1996). For the range test, all variables exhibiting values in the river  
 233 sediment samples that were outside of the range found in the potential sources (i.e. between the  
 234 minimum and maximum values found in source samples) were excluded from the analysis. It is  
 235 important to restrict the tracing parameters to those that show a conservative behavior to avoid  
 236 incorrect source prediction and consequently inaccurate estimations of source contributions (Sherriff  
 237 et al., 2015). Thereafter, the Mann-Whitney U test ( $\alpha = 0.05$ , p-value  $< 0.01$ ) was performed to  
 238 evaluate whether remaining variables could discriminate the source samples. A stepwise  
 239 discriminant function analysis (DFA) was independently run on three set of potential tracing  
 240 properties: (1) colour parameters (i.e. 'colour'), (2) geochemical properties (i.e. 'geochemistry') and  
 241 (3) colour parameters and geochemical properties (i.e. 'colour + geochemistry'). For the last set, the  
 242 raw values of the variables were normalized in order to make them comparable. Indeed, several  
 243 colour parameters were within an order of magnitude of around 0.01 whereas for the geochemical  
 244 parameters the difference was around  $10^6 \text{ mg kg}^{-1}$  which resulted in a poorly conditioned matrix for  
 245 the DFA.

246 The following calculation was therefore applied on the variable values to normalize them:  $x_i -$   
 247  $x_{\min} / x_{\max} - x_{\min}$  where  $x_i$  was value found in source sample (i),  $x_{\min}$  and  $x_{\max}$  were respectively the  
 248 minimum and maximum values found in the source samples. The DFA was carried out to select the  
 249 optimal number of potential tracers to discriminate the sources for each modelling approach with  
 250 the optimal number of potential tracers which must provide the lowest Wilks' lambda value from  
 251 analysis of variance. Indeed, the closer the Wilks' lambda value is to 1, the lower the variability within

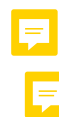



252 the sources compared to the total variability. The DFA was performed in the backward mode with a p  
 253 >0.01 used to select a tracer and p <0.01 used to remove a tracer.

254 Finally, a classical solver-based mixing model was used to model the source contributions from  
 255 the mining and non-mining tributaries to target sediment through simultaneously minimizing the  
 256 mixing model difference (MMD) (Evrard et al., 2019):

257 
$$MMD = \sum_{i=1}^n ((C_i - (A_i x + B_i(1 - x))) / C_i) \text{ Equation 1}$$

258 where n is the number of parameters in the model chosen by the selection process (i.e. steps 1, 2, 3);  
 259  $C_i$  is the Thio River sediment sample parameter (i); x and (1-x) were respectively the contributions of  
 260 source A and B (i.e. mining and non-mining tributaries);  $A_i$  is the mean of parameter (i) in source A  
 261 and  $B_i$  is the mean of parameter (i) in source B. The proportional contribution from each source (x)  
 262 was modelled by solving Equation 1 with the Solver Function in Microsoft Excel with x being between  
 263 0 and 1 and the sum of source contributions (i.e. x and 1-x) equaling 1. The GRG Non-Linear solving  
 264 method was used with automatic scaling in Solver, ignoring integer constraints, with a maximum run  
 265 time of 5000 and allowing for 2500 iterations. A multi-start population size of 2500 was used along  
 266 with the same random seed for each of the model runs while requiring bounds on the variables. A  
 267 constraint precision and convergence of 1.0E-05 were selected. To test the reliability of the 'colour',  
 268 'geochemistry' and 'colour + geochemistry' models, these latter were tested on artificial mixture  
 269 samples.

#### 270 1.6.2.FDVS- PLSR model

271 FDVS-PLSR models were built following the methodology described in Poulenard et al. (2012).  
 272 The first step consisted in applying a principal component analysis (PCA) to evaluate the overall  
 273 variability between FDVS (i.e. 38 wavelengths) of source samples. Subsequently, a discriminant  
 274 analysis (DA) was conducted based on the PCA scores. The purpose of this analysis was to compare  
 275 the Mahalanobis distance between sources samples and to determine if FDVS of source samples



could discriminate the sources. Relationships between FDVS (x variate) and the corresponding weight contribution of the sediment source data sets (y variate) were analyzed using PLSR. The PLSR models were carried out based on the component set providing the lowest predictive error (PRESS, option on XLStat software). Two independent PLSR models were built to estimate the two sediment source contributions. As the artificial mixtures were measured four times by spectroscopy, 84 FDVS of artificial mixture samples were generated including 50 values that were randomly selected to build the models (training set (ST)) and 34 to validate the models (validation set (SV)). The SV:ST ratio used was approximately 1:2, which is in agreement with recommendations provided in the literature (Daszykowski et al., 2002). To evaluate the performance of PLSR models, several indicators such as coefficient of linear regression ( $r^2$ ), root mean square error of calibration (RMSEC) and root mean square error of prediction (RMSEP) values were calculated. Unlike the conventional fingerprinting approach, the estimated contributions of sources were not limited to be in the range of 0 % and 100 %. In a similar way, the sum of source contributions was not constrained to be equal to 100 %. As a result, another way to control the reliability of predictions was to sum the prediction proportions of both models (Legout et al., 2013). FDVS of river sediment samples were then introduced into these PLSR models to estimate the contribution of sediment sources.

## Results

### 1.7.Source description

The ranges of values of all colour parameters measured in the Thio River sediment samples systematically plotted within the range of values observed in the two potential sources (i.e. mining and non-mining tributaries; Figure 2 and Table 2). The range test results confirmed the conservative character of these parameters. For geochemical properties, elemental concentrations measured in the river sediment also plotted within the range of concentrations found in sources (Sellier et al., 2019). According to the range test results, all properties were determined to be conservative.

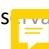

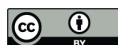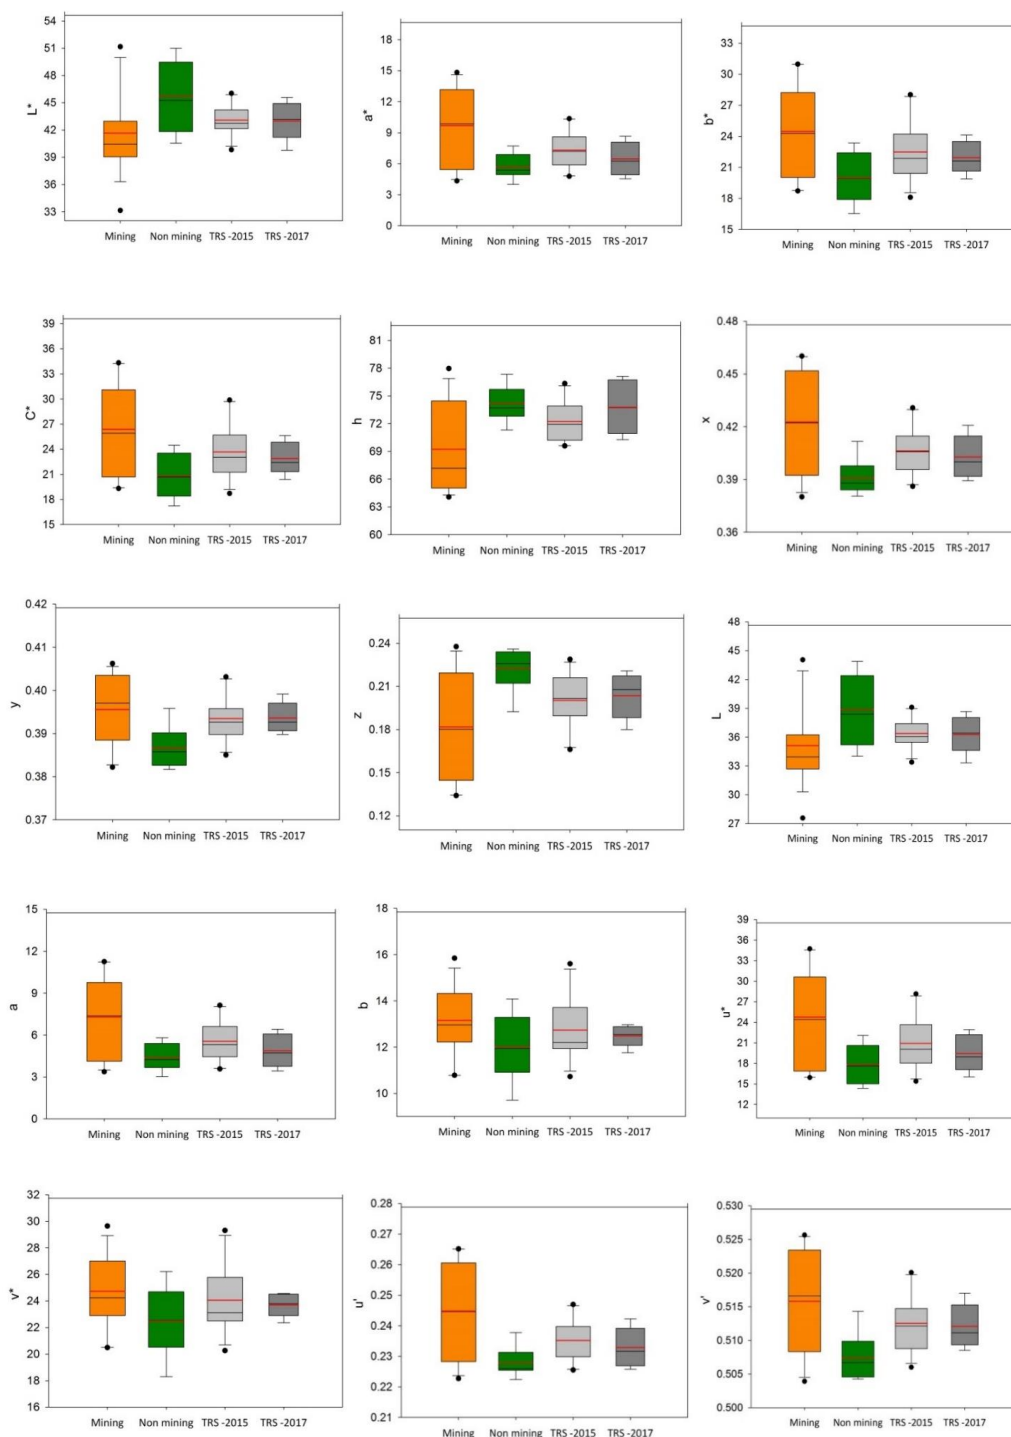

**Figure 2** Box-plots of colour parameter values in the <63  $\mu$ m fraction of sediment collected on the mining tributaries (Mining), non-mining tributaries (Non-mining) and the main Thio River (Thio River sediment (TRS)-flood events of 2015 and 2017). The box indicates the location of the first and third quartiles; the black line indicates the median value; the red line indicates the mean value





**Table 2** Geochemical element content and colour parameter values in the <63 µm fraction of sediment sources and Thio River sediment; results of Mann-Whitney U test and individual DA used to identify the potential tracers to differentiate sources supplying sediment to the Thio River

| <div><div></div></div>           | Mann-Whitney U test |          | DA- correctly classified samples (%) |                            |                               |                                  |                                 |
|----------------------------------|---------------------|----------|--------------------------------------|----------------------------|-------------------------------|----------------------------------|---------------------------------|
| Fingerprinting property          | U-value             | p-value  |                                      | Mining tributaries (n= 16) | Non-mining tributaries (n= 8) | Thio River sediment 2015 (n= 11) | Thio River sediment 2017 (n= 8) |
| Geochemical tracers              |                     |          |                                      |                            |                               |                                  |                                 |
| Al ( <i>g kg<sup>-1</sup></i> )  | 8                   | 0.000    | 87.5                                 | 21 ± 21                    | 67 ± 8                        | 43 ± 15                          | 29 ± 6                          |
| Ca ( <i>mg kg<sup>-1</sup></i> ) | 21                  | 0.007    | 62.5                                 | 3731 ± 470                 | 9286 ± 5194                   | 5281 ± 1201                      | 3945 ± 666                      |
| Cr ( <i>mg kg<sup>-1</sup></i> ) | 124                 | < 0.0001 | 83.3                                 | 7480 ± 4606                | 706 ± 96                      | 4359 ± 2185                      | 5715 ± 1786                     |
| Fe ( <i>g kg<sup>-1</sup></i> )  | 121                 | 0.000    | 91.6                                 | 144 ± 70                   | 62 ± 24                       | 43 ± 15                          | 29 ± 6                          |
| K ( <i>mg kg<sup>-1</sup></i> )  | 2                   | < 0.0001 | 95.8                                 | 1657 ± 2160                | 14019 ± 3702                  | 5944 ± 3294                      | 3750 ± 974                      |
| Mg ( <i>g kg<sup>-1</sup></i> )  | 119                 | 0.000    | 83.3                                 | 99 ± 59                    | 16 ± 13                       | 88 ± 33                          | 117 ± 21                        |
| Mn ( <i>mg kg<sup>-1</sup></i> ) | 108                 | 0.006    | 83.3                                 | 2531 ± 1317                | 1439 ± 606                    | 2068 ± 667                       | 1786 ± 516                      |
| Ni ( <i>mg kg<sup>-1</sup></i> ) | 125                 | < 0.0001 | 91.6                                 | 6576 ± 5075                | 358 ± 339                     | 4218 ± 1938                      | 4341 ± 1239                     |
| Si ( <i>g kg<sup>-1</sup></i> )  | 6                   | < 0.0001 | 91.6                                 | 178 ± 42                   | 254 ± 28                      | 221 ± 15                         | 204 ± 7                         |
| Ti ( <i>mg kg<sup>-1</sup></i> ) | 13                  | 0.001    | 87.5                                 | 1409 ± 2077                | 5446 ± 835                    | 2771 ± 1197                      | 1663 ± 457                      |
| Zn ( <i>mg kg<sup>-1</sup></i> ) | 68                  | 0.834    | -                                    | 146 ± 47                   | 125 ± 4                       | 134 ± 17                         | 125 ± 8                         |
| Colour parameters                |                     |          |                                      |                            |                               |                                  |                                 |
| L*                               | 24                  | 0.013    | -                                    | 41.6 ± 4.6                 | 45.7 ± 3.9                    | 43.1 ± 1.7                       | 43.0 ± 2.0                      |
| a*                               | 104                 | 0.013    | -                                    | 9.7 ± 3.8                  | 5.7 ± 1.2                     | 7.3 ± 1.9                        | 6.5 ± 1.7                       |
| b*                               | 106                 | 0.009    | 70.8                                 | 24.5 ± 4.5                 | 20.0 ± 2.5                    | 22.5 ± 3.0                       | 21.9 ± 1.6                      |
| C*                               | 108                 | 0.006    | 66.6                                 | 26.4 ± 5.5                 | 20.8 ± 2.7                    | 23.7 ± 3.5                       | 22.9 ± 2.0                      |
| h                                | 26                  | 0.019    | -                                    | 69.2 ± 4.8                 | 74.2 ± 1.9                    | 72.2 ± 2.2                       | 73.8 ± 2.9                      |
| x                                | 107                 | 0.007    | 75                                   | 0.42 ± 0.03                | 0.39 ± 0.01                   | 0.41 ± 0.01                      | 0.40 ± 0.01                     |
| y                                | 111                 | 0.003    | 79.2                                 | 0.396 ± 0.008              | 0.387 ± 0.005                 | 0.393 ± 0.005                    | 0.394 ± 0.004                   |
| z                                | 19                  | 0.005    | 75                                   | 0.18 ± 0.04                | 0.22 ± 0.01                   | 0.20 ± 0.02                      | 0.20 ± 0.02                     |
| L                                | 27                  | 0.013    | -                                    | 35.1 ± 4.2                 | 38.9 ± 3.7                    | 36.4 ± 1.6                       | 36.3 ± 1.9                      |
| a                                | 103                 | 0.016    | -                                    | 7.3 ± 2.9                  | 4.4 ± 1.0                     | 5.6 ± 1.5                        | 4.9 ± 1.2                       |
| b                                | 91                  | 0.106    | -                                    | 13.1 ± 1.5                 | 12.0 ± 1.5                    | 12.7 ± 1.4                       | 12.5 ± 0.4                      |
| u*                               | 101                 | 0.023    | -                                    | 24.8 ± 6.9                 | 17.8 ± 2.8                    | 20.9 ± 4.0                       | 19.4 ± 2.7                      |
| v*                               | 93                  | 0.081    | -                                    | 24.7 ± 2.8                 | 22.5 ± 2.7                    | 24.1 ± 2.6                       | 23.7 ± 0.8                      |
| u'                               | 105                 | 0.011    | -                                    | 0.245 ± 0.016              | 0.228± 0.005                  | 0.235 ± 0.007                    | 0.233 ± 0.007                   |
| v'                               | 111                 | 0.003    | 79.2                                 | 0.516 ± 0.008              | 0.507 ± 0.004                 | 0.513 ± 0.004                    | 0.512 ± 0.003                   |

307



## 1.8. Selection of parameters/properties for modelling

### 1.8.1. 'Colour' model

According to the Mann-Whitney U test results, six colour parameters (*i.e.*  $b^*$ ,  $C^*$ ,  $x$ ,  $y$ ,  $z$ ,  $v'$ ) provided significant discrimination between the two sediment sources (*i.e.*  $p$ -value  $< 0.01$ , Table 2). The backward DFA selected only  $v'$  as the optimal tracer of mining and non-mining source sediments (Figure 2, Table 3). Although this parameter correctly classified 79.2 % of sources, the high Wilk's lambda value obtained (*i.e.* 0.7209, Table 3) induced that only 27.9 % of variance was explained by  $v'$ . The low Mahalanobis distance value obtained (*i.e.* 1.6) confirmed that sediment sources were not well separated. Accordingly, and owing to the high error percentage of the source discrimination provided by this approach (*i.e.* 72.1 %), source contributions were not modeled with the 'colour' model.

### 1.8.2. 'Geochemistry' model

When considering the two potential sediment sources, all geochemical properties (except Zn) were selected as potentially discriminant by the Mann-Whitney U test (*i.e.*  $p$ -value  $< 0.01$ , Table 2). Among the 10 potential tracers, 5 were selected by the backward DFA to model sediment source contributions from mining and non-mining tributaries with 95.3 % of sources correctly classified and 83.1 % of variance explained by K. This percentage of variance explained was deduced from the final Wilk's lambda value obtained (*i.e.* 0.1691). Moreover, the Mahalanobis distance value showed that the sediment sources were well separated from each other with a significant distance of 20.3 (Table 3) (Sellier et al., 2019).

### 1.8.3. 'Colour + geochemistry' model

When combining colour parameters and geochemical properties, the DFA selected five optimal tracers (*i.e.* K, Ca, Ti,  $b^*$ ,  $C^*$ ) able to correctly classify 100 % of the sources. A significant improvement in the source discrimination was observed with the lowest Wilk's lambda value obtained (*i.e.* 0.0734) and the highest percentage of variance explained (*i.e.* 92.6 %). Moreover, the Mahalanobis distance



value obtained (i.e. 52.1) was more than 2.5 times higher than that estimated with the 'geochemistry' model (Table 3), thus resulting in a better separation between sediment sources than the previous approach (i.e. 'geochemistry')

**Table 3** Results of DFA used to identify the optimum tracer combination to differentiate sources supplying sediment to the Thio River

| Fingerprint property selected | Wilks' Lambda | Variance explained by the variables (%) | Squared Mahalanobis distance | Correctly classified samples (%) |
|-------------------------------|---------------|-----------------------------------------|------------------------------|----------------------------------|
| 'Colour'                      |               |                                         |                              |                                  |
| v'                            | 0.7209        | 27.9                                    | 1.6                          | 79.2                             |
| 'Geochemistry'                |               |                                         |                              |                                  |
| K                             | 0.1691        | 83.1                                    | 20.3                         | 95.3                             |
| 'Colour + Geochemistry'       |               |                                         |                              |                                  |
| K, Ca, Ti, b*, C*             | 0.0734        | 92.6                                    | 52.1                         | 100                              |

### 1.9. Assessment of model performance on artificial mixture samples

Prior to applying mixing models to river sediments, preliminary tests were conducted to control the validity of the models (i.e. 'geochemistry' and 'colour + geochemistry') and the associated estimations of source contribution errors. When applying these models on the artificial mixture samples, actual and predicted proportions were well correlated for both models (i.e.  $r^2 = 0.99$  and  $r^2 = 0.98$  respectively for 'geochemistry' and 'colour + geochemistry' models) (Figure 3).

However, the 'geochemistry' model described in Figure 3-a showed that the contributions of mining tributaries were overestimated. With 100 % of actual mining contributions, 100 % of mining contribution was predicted by the model. However, instead of 0 % of actual mining contributions, a mining contribution of 15.5% was predicted by the model. It means that the more the estimated mining source contributions tends towards 0%, the greater the associated overestimation (i.e. maximum 15.5 %) (Figure 3-a). The 'colour + geochemistry' model also provided a slight



overestimation of the contribution of mining tributaries (i.e. 7 % intercept of the regression line,  
 Figure 3-b). Given the slope of the regression line calculated is close to 1 (i.e. 0.98), this 7%  
 overestimation remains constant over the entire range of potential contributions.

**Figure 3** Comparison between actual mining source proportions prepared in artificial mixtures and the mining

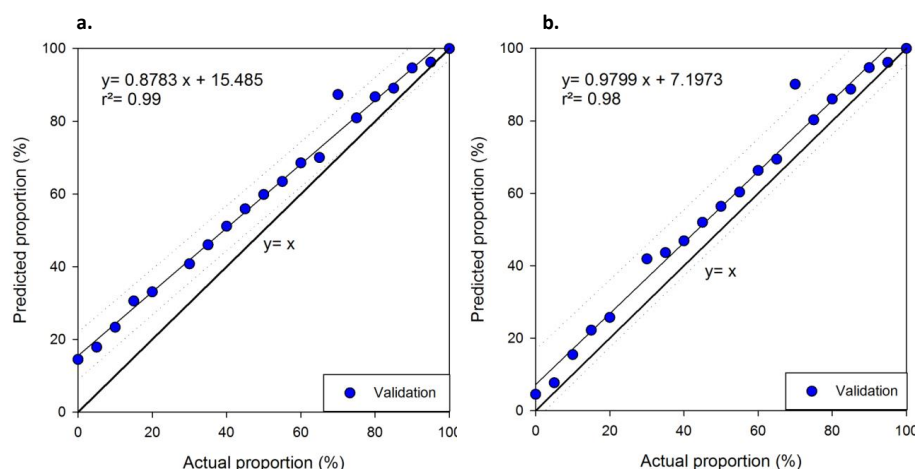

source proportions predicted by the 'geochemistry' (a) and 'colour + geochemistry' (b) models

#### 1.10. Building partial least-squares models based on FDVS

Mining sources are characterized by a red-orange color while sediments originating from non-mining sources are grey. The color contrasts may be explained by the distinct geochemical composition of these sources. Mean FDVS indicated the presence of goethite (i.e. at 445 and 525 nm), hematite (i.e. at 555, 565 and 575 nm), and organic matter (i.e. between 600-700 nm) (Debret et al., 2011) in both mining and non-mining sources (Figure 4). In similar way, the Thio River sediment samples (2015, 2017) showed similar characteristics since the variations of the mean FDVS remained between those found in the sources (Figure 4). Nevertheless, some differences can be observed between the sources. The spectral signature of goethite is slightly stronger at 445 nm in non-mining tributaries compared to mining tributaries. No difference between sources was observed at 525 nm, the second wavelengths characterizing the presence of goethite. In contrast, the spectral signature of

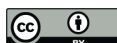

hematite (*i.e.* at 555, 565 and 575 nm) was stronger in mining tributaries than in non-mining tributaries.

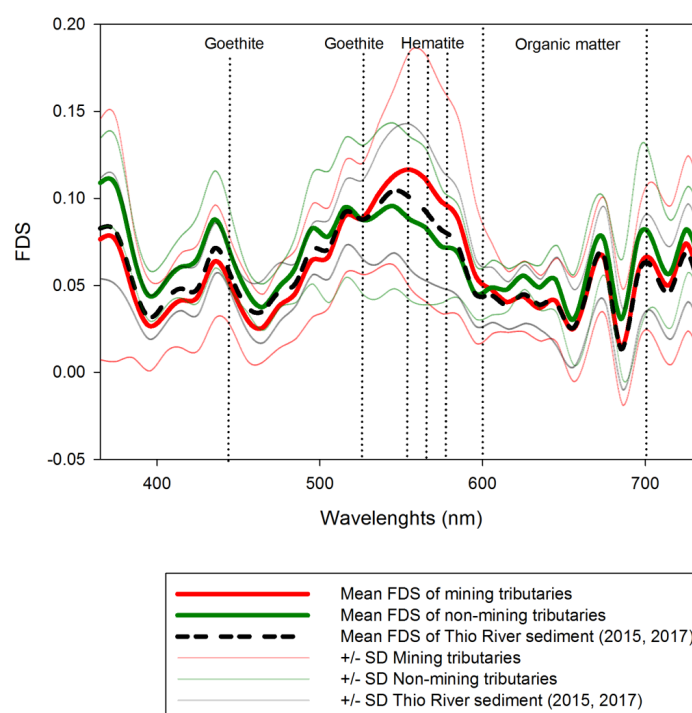

**Figure 4** FDVS measured in the <63  $\mu\text{m}$  fraction of sources and Thio River sediment samples

To test the potential discrimination offered by FDVS, a PCA was applied on the source data set. The first ten principal components from PCA explained 99 % of the total variation in the spectra. The DFA performed on these components resulted in a final Wilks' lambda value of 0.1585. It means that 84.1 % of variance is explained by these ten components. Moreover, 100 % of the source samples were correctly classified. The performances of FDVS-PLSR models are presented in Figure 5. The mining and non-mining tributary FDVS-PLSR models provided an excellent correlation between actual and predicted proportions with  $r^2$  and slopes close to 1 and intercepts of linear regression close to 0. The root mean square error of calibration (RMSEC) values estimated for both models were low, *i.e.* 3.4 % and 3.1 % respectively for mining and non-mining tributary models. These models also



provided a good predictability of source contributions with low root mean square error of prediction (RMSEP) values (i.e. 8.0 % and 4.7 % respectively for mining and non-mining tributary models). Another way to control the reliability of predictions was to sum the predicted proportions of both models (Legout et al., 2013). Considering the whole data set used in the construction of the partial least-squares regression models (i.e. calibration and validation) led to a mean sum of the predicted source proportions of 102 % (SD 3 %, range: 98-114 %), thus highlighting the effective prediction performance of FDVS-PLSR models.

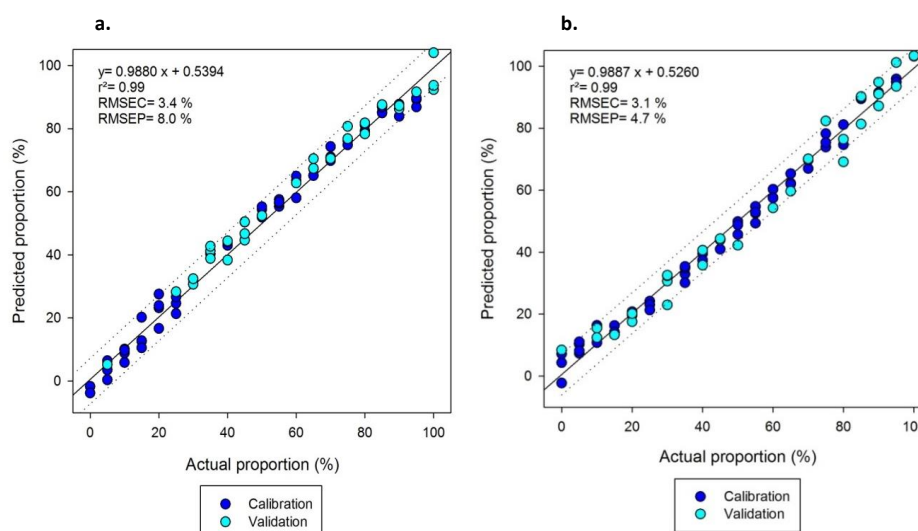

**Figure 5** Building of FDVS-PLSR models for mining sources (a) and non-mining sources (b)

## 1.11. Source apportionment modelling

### 1.11.1. 'Geochemistry' model

The 'geochemistry' model estimated that the mining tributaries contributed an average of 65 % (SD 27 %) of the Thio River sediment during the 2015 flood event; they therefore dominated sediment inputs overall during this event. Nevertheless, non-mining tributaries locally mainly contributed to the sediment inputs at three sampling points along the Thio River (Figure 6-a, Table 4, sampling points [3, 5, 7]). These contributions did not, however, compensate those provided by



394 mining tributaries in the estuary (63-89 %). Indeed, the dominant mining contributions found in  
395 upstream river reaches (96 %, Figure 6-a, Table 4, sampling point [1]) gradually decreased along the  
396 Thio River, fluctuating between 17-77 % before increasing again at the confluence between the Thio  
397 River and the mining tributaries draining the Thio Plateau mining area (i.e. 85 %, Figure 6-a, Table 4,  
398 sampling point [8]) and reaching 60-64 %.

399

400  model also demonstrated that mining tributaries dominated sediment inputs with a mean  
401 contribution of 83 % (SD 8%) during the 2017 flood event (Table 5). The lowest mining tributary  
402 contributions estimated (i.e. 69 %) was found after the confluence with the Kouaré non-mining  
403 tributary (Figure 6-b, Table 5, sampling point [4]). Nevertheless, further downstream, the proportions  
404 of the mining sources increased again to reach 77-83 % in the estuary (Figure 6-b, Table 5, sampling  
405 points [7, 8]).

406

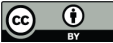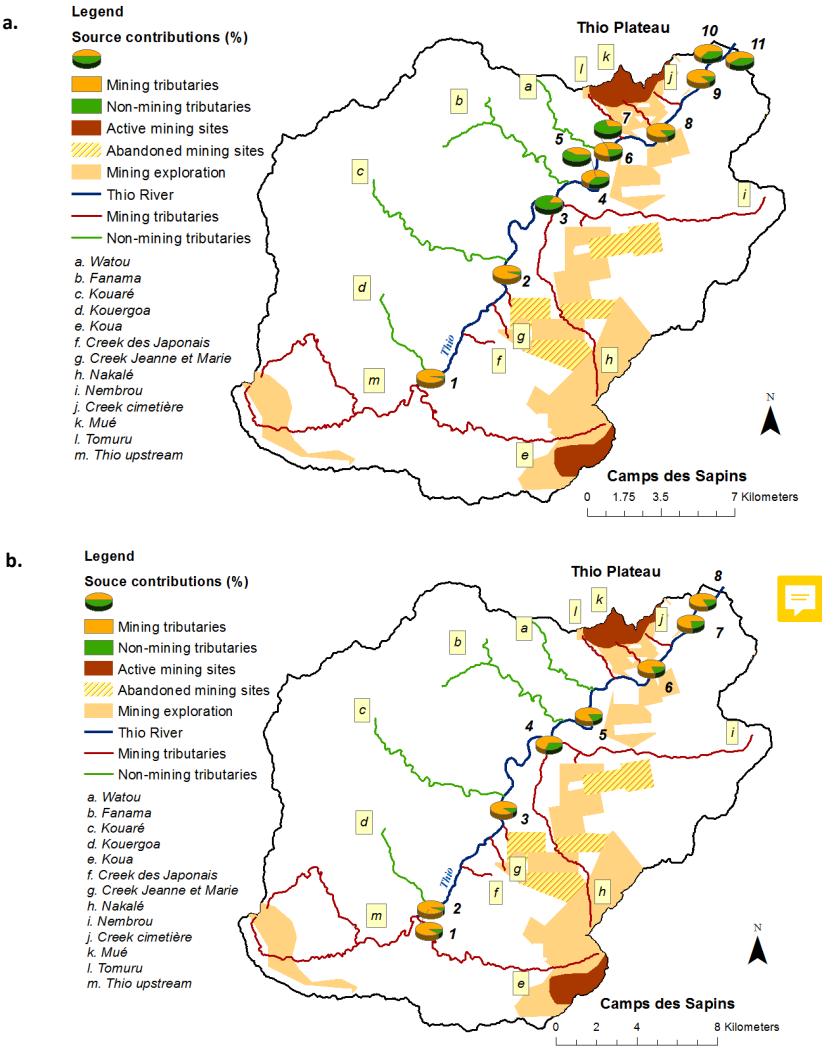

407 **Figure 6** Relative contributions of mining and non-mining tributaries to the sediment collected in the Thio River  
408 during the 2015 (a) and 2017 (b) flood events using the 'geochemistry' model

409





410 1.11.2. 'Colour + geochemistry' model

411 Similar results were obtained with the 'colour + geochemistry' model. The contributions of  
412 mining tributaries were estimated to an average of 68 % (SD 25 %) for the 2015 flood event. Mining  
413 tributary contributions provided almost all the sediment transiting the uppermost reach of the Thio  
414 River (i.e. 99 %, Figure 7-a, Table 4, sampling point [1]). However, after the confluence with the  
415 Kouaré tributary, non-mining tributaries dominated with a contribution of 83 % (Figure 7-a, Table 4,  
416 sampling point [3]). Further downstream, the contribution of mining tributaries increased again with  
417 supplies varying between 34- 89 % to reach 58- 70 % in the estuary (Figure 7-a, Table 4). The largest  
418 difference between 'geochemistry' and 'colour + geochemistry' model outputs was 18 % for the 2015  
419 flood event.

420 The 'colour + geochemistry' model also demonstrated that 88 % (SD 8 %) of the sediment  
421 supply originated from mining tributaries during the 2017 flood event. Along the Thio River, mining  
422 tributary contributions varied between 100 % in the uppermost reach, 74% after the Kouaré river  
423 confluence and 83-85% in the estuary (Figure 7-b, Table 5). The largest difference between  
424 'geochemistry' and 'colour + geochemistry' model outputs was 10 % for the 2017 flood event (Table  
425 5).

426

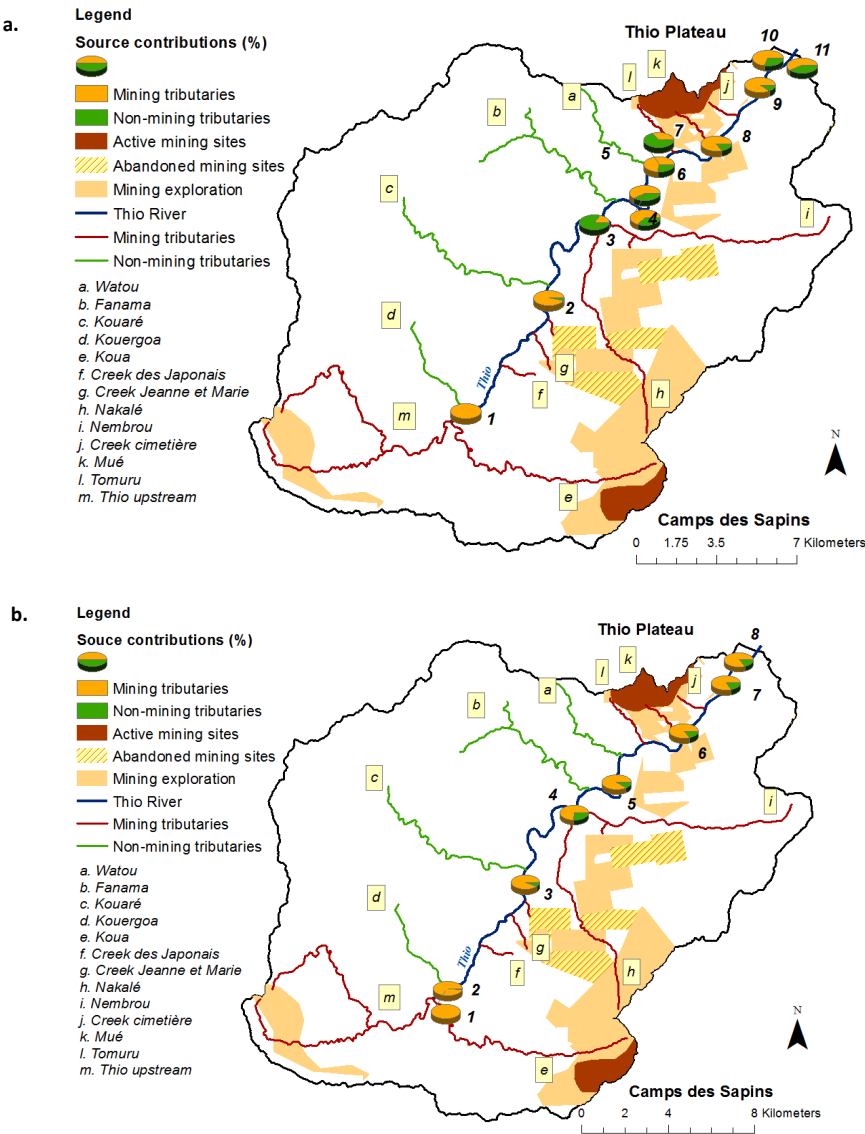

427 **Figure 7** Relative contributions of mining and non-mining tributaries to the sediment collected in the Thio River  
428 during the 2015 (a) and 2017 (b) flood events using the ‘colour + geochemistry’ model



### 429 1.11.3.FDVS-PLSR model

430 When applying the FDVS-PLSR models (i.e. mining and non-mining tributary contributions) to  
 431 the river sediment samples (2015, 2017), the mean sums of the source contributions were 92 % (SD 8  
 432 %) and 80 % (SD 13 %), respectively, for the 2015 and 2017 flood events (Tables 4 and 5). Owing that  
 433 predicted sums were different from the expected 100%, a bar plot display of the source contributions  
 434 has been chosen to facilitate the interpretation of the results (Figure 8).

435 According to the FDVS-PLSR model results, 34 % (SD 22 %) of sediment supply originated from  
 436 mining tributaries while non-mining tributary contribution provided 58 % (SD 18 %) of the sediment  
 437 input for the 2015 flood event (Figure 8-a, Table 4). In the upper part of the Thio River catchment,  
 438 non-mining tributaries largely dominated with a contribution of 80 % versus 6 % for mining  
 439 tributaries. Along the Thio River, mining tributary contributions gradually increased to reach 70 %  
 440 after the Mué tributary confluence (i.e. one of tributaries draining the Thio Plateau Mine, Figure 8-a,  
 441 Table 4, sampling point [9]). The non-mining tributary contributions fluctuated along the Thio River  
 442 between 41-85 % (Figure 8-a, Table 4, sampling points [2-8]) and reached a minimum (i.e. 28 %,   
 443 Figure 8-a, Table 4, sampling point [9]) after the Mué tributary confluence. In the estuary, sediment  
 444 supply was originated from 51-70 % of mining tributaries and 28- 52 % of non-mining tributaries  
 445 (Figure 8-a, Table 4, sampling points [9, 10, 11]).

446 The FDVS-PLSR models also indicated that mining and non-mining tributaries respectively  
 447 contributed a mean of 29 % (SD 20 %) and 51 % (SD 11 %) of sediment (Figure 8-b, Table 5) during  
 448 the 2017 flood event. In a similar way, mining contributions gradually increased along the Thio River  
 449 from 11 % in upper parts to reach 52-58 % in the estuary. On the contrary, non-mining contributions  
 450 gradually decreased from 56 % in uppermost parts to reach 35-36 % in the estuary (Figure 8-b, Table  
 451 5).

452 In summary, the FDVS-PLSR models provided opposite results to those of the conventional  
 453 sediment fingerprinting approach (i.e. 'geochemistry' and 'colour + geochemistry' models). According



454 to the FDVS-PLSR models, non-mining tributaries contributed the majority of the sediment supply for  
455 the 2015 (58 %, SD 18 %) and 2017 (51 %, SD 11 %) flood events. On the contrary, the 'geochemistry'  
456 and 'colour + geochemistry' models demonstrated that mining tributary contributions dominated  
457 sediment supply for the 2015 (i.e. respectively 65 % (SD 27%) and 68 % (SD 28 %)) and 2017 flood  
458 events (i.e. respectively 83% (SD 8%) and 88 % (SD 8%)).

459

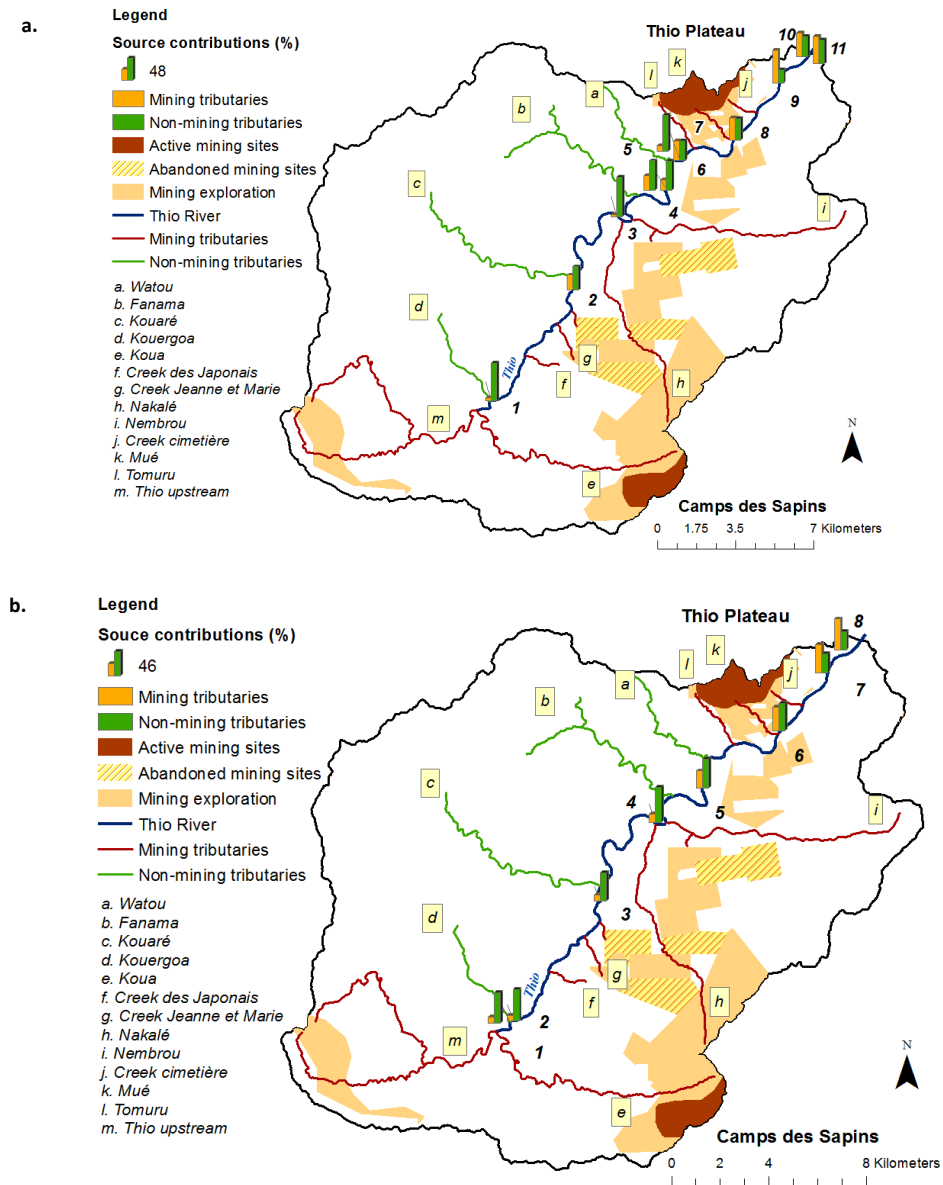

460 **Figure 8** Relative contributions of mining and non-mining tributaries to the sediment collected in the Thio River  
461 during the 2015 (a) and 2017 (b) flood events using the FDVS-PLSR models



462 **Table 4** Source contributions calculated by FDVS-PLSR, 'geochemistry', 'colour + geochemistry' approaches for sediment deposited during the flood of February 25,2015

| Sampling point | Mining tributary contributions (%) |              |                       | Non-mining tributary contributions (%) |              |                       | Sum of source contributions (%) |              |                       |
|----------------|------------------------------------|--------------|-----------------------|----------------------------------------|--------------|-----------------------|---------------------------------|--------------|-----------------------|
|                | FDS- PLSR                          | Geochemistry | Colour + Geochemistry | FDS- PLSR                              | Geochemistry | Colour + geochemistry | FDS- PLSR                       | Geochemistry | Colour + geochemistry |
| 1              | 6                                  | 96           | 99                    | 80                                     | 4            | 1                     | 86                              | 100          | 100                   |
| 2              | 33                                 | 95           | 96                    | 51                                     | 5            | 4                     | 84                              | 100          | 100                   |
| 3              | 4                                  | 17           | 17                    | 85                                     | 83           | 83                    | 90                              | 100          | 100                   |
| 4              | 32                                 | 65           | 65                    | 64                                     | 35           | 35                    | 96                              | 100          | 100                   |
| 5              | 22                                 | 41           | 59                    | 63                                     | 59           | 41                    | 85                              | 100          | 100                   |
| 6              | 42                                 | 77           | 74                    | 41                                     | 23           | 26                    | 83                              | 100          | 100                   |
| 7              | 12                                 | 29           | 34                    | 79                                     | 71           | 66                    | 91                              | 100          | 100                   |
| 8              | 47                                 | 85           | 83                    | 46                                     | 15           | 17                    | 93                              | 100          | 100                   |
| 9              | 70                                 | 88           | 89                    | 28                                     | 12           | 11                    | 98                              | 100          | 100                   |
| 10             | 51                                 | 64           | 70                    | 44                                     | 36           | 30                    | 94                              | 100          | 100                   |
| 11             | 59                                 | 60           | 58                    | 52                                     | 40           | 42                    | 111                             | 100          | 100                   |
| M (%)          | 34                                 | 65           | 68                    | 58                                     | 35           | 32                    | 92                              | 100          | 100                   |
| SD (%)         | 22                                 | 27           | 25                    | 18                                     | 27           | 25                    | 8                               | -            | -                     |
| Minimum (%)    | 4                                  | 17           | 17                    | 28                                     | 4            | 1                     | 84                              | -            | -                     |
| Maximum (%)    | 70                                 | 96           | 99                    | 85                                     | 83           | 83                    | 111                             | -            | -                     |



464 **Table 5** Source contributions calculated by FDVS-PLSR, 'geochemistry', 'colour + geochemistry' approaches for sediment deposited during the flood of April 10,2017

| Sampling point | Mining tributary contributions (%) |              |                       | Non-mining tributary contributions (%) |              |                       | Sum of source contributions (%) |              |                       |
|----------------|------------------------------------|--------------|-----------------------|----------------------------------------|--------------|-----------------------|---------------------------------|--------------|-----------------------|
|                | FDS- PLSR                          | Geochemistry | Colour + Geochemistry | FDS- PLSR                              | Geochemistry | Colour + geochemistry | FDS- PLSR                       | Geochemistry | Colour + geochemistry |
| 1              | 11                                 | 90           | 100                   | 56                                     | 10           | 0                     | 66                              | 100          | 100                   |
| 2              | 9                                  | 94           | 98                    | 58                                     | 6            | 2                     | 68                              | 100          | 100                   |
| 3              | 11                                 | 89           | 92                    | 52                                     | 11           | 8                     | 63                              | 100          | 100                   |
| 4              | 16                                 | 69           | 74                    | 66                                     | 31           | 26                    | 82                              | 100          | 100                   |
| 5              | 32                                 | 82           | 89                    | 54                                     | 18           | 11                    | 86                              | 100          | 100                   |
| 6              | 44                                 | 81           | 84                    | 51                                     | 19           | 16                    | 95                              | 100          | 100                   |
| 7              | 52                                 | 77           | 83                    | 36                                     | 23           | 17                    | 88                              | 100          | 100                   |
| 8              | 58                                 | 83           | 85                    | 35                                     | 17           | 15                    | 92                              | 100          | 100                   |
| Model (%)      | 29                                 | 83           | 88                    | 51                                     | 17           | 12                    | 80                              | 100          | 100                   |
| Model D (%)    | 20                                 | 8            | 8                     | 11                                     | 8            | 8                     | 13                              | -            | -                     |
| Minimum (%)    | 9                                  | 69           | 74                    | 35                                     | 6            | 0                     | 63                              | -            | -                     |
| Maximum (%)    | 58                                 | 94           | 100                   | 66                                     | 31           | 26                    | 95                              | -            | -                     |



## 1.6.Complementary tests: representativeness of artificial mixture samples used for the FDVS-PLSR models compared to source samples

Given the opposite results obtained in terms of source contributions between FDVS-PLSR models on the one hand and 'geochemistry' and 'colour + geochemistry' models on the other hand, complementary analyses were carried out on individual source samples (i.e. not the composite samples used to create the artificial mixtures) to estimate their composition in terms of source contributions with FDVS-PLSR models. As done in Legout et al. (2013) to assess uncertainties in the fingerprinting approach due to source heterogeneity, they were considered as river sediment samples. A mean sum of the predicted source proportions of 94 % (SD 17 %, range: 49-131 %) was calculated from the source sample data set. The compositions of mining and non-mining tributary samples in Figures 9 and 10 show that artificial mixture samples built from a mix between the composite mining source sample and the composite non-mining source sample did not cover entirely the range of values found in all the sources samples, which may explain why some source samples showed mining and non-mining tributary composition lower than 0 and/or higher than 100 %.

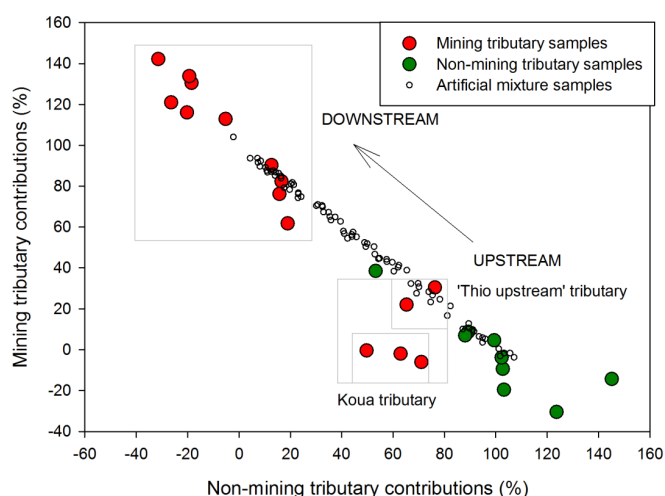

**Figure 9** Relative compositions of mining and non-mining sources estimated by the FDVS-PLSR models applied to the individual source sediment samples





Moreover, two sub-groups of mining tributary samples can be distinguished, the first one corresponding to samples collected on the mining tributaries located in the uppermost part of the catchment and the second to samples collected on the mining tributaries located further downstream. The FDVS-PLSR differentiated rather well the second group since the mining tributary composition is dominant in these samples. On the contrary, the first group referred to as 'Upstream' merged with the non-mining tributary samples (Figure 9). Indeed, Figure 10 shows the mining tributaries located in the upper part of the catchment were defined as 'non-mining tributaries' by the FDVS-PLSR model.

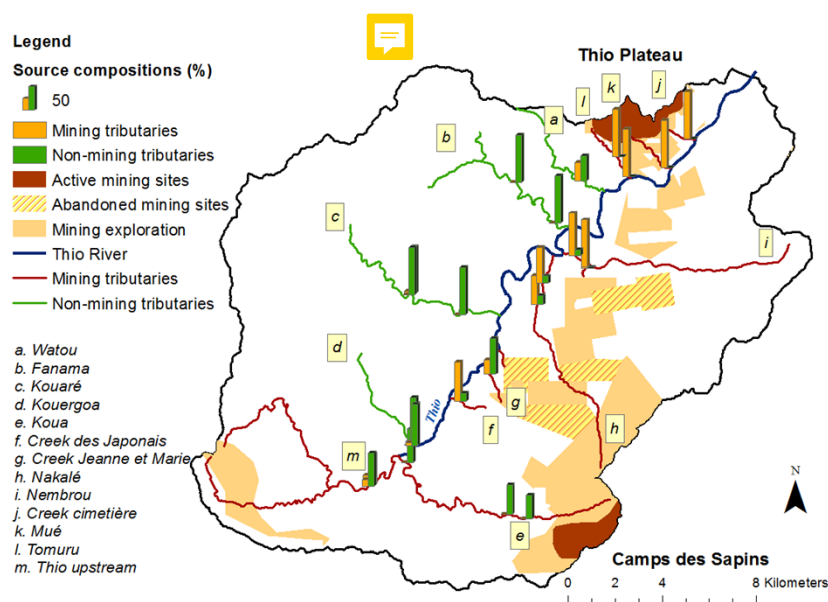

**Figure 10** Relative compositions of mining and non-mining sources estimated by the FDVS-PLSR models applied to the individual sediment sources in the Thio River catchment

The low K contents found in these samples confirmed, however, that they were mainly supplied by mining sources (Figure 11). Nevertheless, a colour difference could be observed visually and through variations of the  $a^*$  parameter: the  $a^*$  values increased from upper parts to lower, which results in an increasingly red coloration of mining tributary samples in downstream direction. Figure 11 shows also that the  $a^*$  values found in samples collected in the upper catchment part

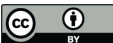

498 overlapped with those of non-mining tributary samples. Among the 'upstream' mining tributary  
499 samples, only three samples collected on the Koua tributary (i.e. draining Camps des Sapins mine)  
500 showed values that were not comprised in the ranges covered by the artificial mixture samples  
501 (Figure 9).

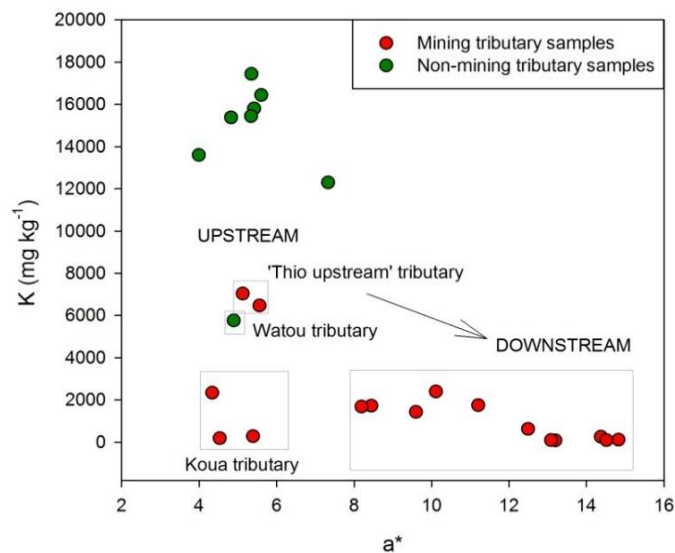

502 **Figure 11** Diagram of K contents as a function of  $a^*$  parameter values within sediment sources and artificial  
503 mixture samples

504 Discussion

### 505 1.7. Advantages and limits of models

#### 506 1.7.1. 'Colour' model

507 One of the objectives of this study was to test the contribution of spectrophotometry for  
508 improving the source discrimination. Indeed, visual observations indicated that mining tributary  
509 samples were red-orange whereas non-mining tributary samples were rather grey. However, the  
510 results showed that the colour parameters, when used individually, did not provide sufficient  
511 discrimination between sources (Table 2) to meet this objective. Indeed, some mining tributary  
512 samples showed colour parameter values similar to those found in non-mining tributary samples



513 (e.g.  $v'$  at Table 3, or  $a^*$  shown at Figure 11). This overlap of value ranges could explain in particular  
514 the inability of the 'colour' model to provide satisfactory source discrimination. Nevertheless, results  
515 obtained with colour parameter analyses coupled to visual observations highlighted the occurrence  
516 of two groups of mining tributary samples (i.e. 'Upstream' and 'Downstream'). The coloration  
517 differences (i.e. orange/ 'Upstream' and 'red/Downstream') observed between these two groups  
518 could be due to the the fact that on the one hand, the reddish colour does not provide a highly  
519 conservative signature as it may be altered by the oxydo-reduction of iron minerals during the  
520 periods of submersion of sediments under water. On the other hand, the presence of different types  
521 of nickel ores could explain these coloration differences. Indeed, nickel ore formation depends partly  
522 on the morphological context, for instance on whether nickel ores are located in a basin, on a plateau  
523 or a slope. This morphological context influences the weathering level of peridotites (i.e. laterite  
524 profile: red laterites at the top >> yellow laterites >> saprolites >> peridotites at the bottom). In the  
525 Thio River catchment, nickel ores from the Thio Plateau mine are 'plateau nickel ores' whereas those  
526 from the Camps des Sapins mine are 'slope nickel ores' (Mardot et al., 2018). No information is  
527 provided in the literature on the types of nickel ores that were mined in abandoned mining sites. The  
528 red coloration of the 'Downstream' mining tributary samples could then be associated with more  
529 altered laterite profiles with a thicker layer of red laterites compared to the 'Upstream' mining  
530 tributary samples, which could be associated with a laterite profile with a thinner layer of red  
531 laterites.

#### 532 1.7.2. 'Geochemistry' model

533 The 'geochemistry' model based on K provided significant discrimination between sources  
534 (Table 2), regardless of the types of nickel ores that may be found in the Thio River catchment. K is a  
535 lithological tracer discriminating sediments originating from the erosion of the two dominant  
536 lithologies (i.e. peridotite massifs vs. volcano-sedimentary formations) in the Thio River catchment.  
537 As anthropogenic erosion (i.e. due to mining activities) dominates on the peridotite massifs (Garcin



et al., 2017), K therefore provides an optimal discrimination between mining and non-mining tributary contributions.

This parameter classified the source samples rather well (i.e. 95.3 % of correct classification, Table 3). Indeed, the 16 mining source samples were all correctly classified (100%) and only one non-mining source sample was not correctly classified (87.5 %), it corresponds to the Watou tributary sample (Figure 11). This sample showed a K content similar to that found in mining tributary samples. The Watou tributary is particular because it drains both volcano-sedimentary formations and peridotite massifs that were not exploited for mining, which justifies that it was considered as a non-mining tributary. The K content measured in this sample could be representative of that found in sediment sources characterized by a mix between the two dominant lithologies. Again, when observing Figure 11, two mining tributary samples (i.e. 'Thio upstream') showed similar K contents to that found in the Watou tributary sample. The 'Thio upstream' tributary also drains both areas associated with volcano-sedimentary formations and exploited peridotite massifs (i.e. mining prospection), which justifies that it was considered as a mining tributary.

The analysis of colour parameters coupled with that of geochemical elements indicated that these samples collected on the 'Thio upstream' tributary showed a less red coloration not because they are associated with a different type of ore, as could be the case for the samples collected on Koua tributary draining Camps des Sapins mine (Figure 11), but because they are characterized by a mix of both lithologies. As a result, the 'geochemistry' model showed a certain limitation to classify source samples characterized by a mix of both lithologies. The performance of the 'geochemistry' model described in Table 2 remains, however, excellent. The application of this model on artificial mixture samples provided very satisfactory results (Figure 3-a) with a good correlation between the predicted and the actual source proportions ( $r^2 = 0.99$ ). An overestimation of mining tributary contributions is, however, to be taken into account. It was evaluated to a maximum at 15%. This



562 overestimation is greater when the mining contributions estimated by the model tend towards 0 %  
 563 (maximum: 15.5 %, Figure 3-a).

#### 564 1.7.3. 'Colour + geochemistry' model

565 The 'colour + geochemistry' (i.e. K, Ca, Ti, b\*, C\*) model provided the best discrimination  
 566 between sources (Table 3). The inclusion of colour parameters in the 'colour + geochemistry'  
 567 approach allowed for the discrimination of source samples (i.e. 100 % of correctly classified source  
 568 samples) that a 'geochemistry' approach alone could not achieve. Results of the tests carried out on  
 569 the artificial mixture samples also showed an excellent correlation between the predicted and the  
 570 actual source proportions (i.e.  $r^2 = 0.98$ ). A slight overestimation of the mining tributary contributions  
 571 (7 %) was observed with this approach, which remains rather reasonable (Figure 3-b). In this model, K  
 572 is the lithological tracer which has the higher discriminant powerful (Table 2), which may explain the  
 573 similarity of results obtained with the 'colour + geochemistry' and the 'geochemistry' models.  
 574 Indeed, mining tributaries contributed an average of 65 % (SD 27 %) for 'colour + geochemistry'  
 575 model and 68 % (SD 25 %) for 'geochemistry' model (Table 4). For the 2017 flood event, mining  
 576 source contributions largely dominated the sediment production with a mean contribution of 83 %  
 577 (SD 8 %) for the 'geochemistry' model and 88 % (SD 8 %) for the 'colour + geochemistry' model.

#### 578 1.7.4. FDVS-PLSR models

579 The FDVS-PLSR models built from artificial mixture samples showed excellent theoretical  
 580 predictive performances (e.g.  $r^2$ , RMSEC, RMSEC, Figure 5). However, the application of these models  
 581 on river sediment samples provided questionable results. Indeed, the artificial mixture samples did  
 582 not cover entirely the ranges of values found in all sources samples, thus resulting in an  
 583 overestimation (i.e. superior to 100 %) and an underestimation (i.e. inferior to 0 %) of source  
 584 composition (Figure 9) in several source samples. Similarly to what was previously observed, three  
 585 sub-groups of mining tributary samples can be distinguished, one of which (i.e. 'Thio Upstream') is  
 586 partially merged with the non-mining tributary samples (Figure 9). When modelling the source



contributions with the FDVS-PLSR models, a bias was created because the contributions of this mining tributary may be mainly considered as the contributions of non-mining tributaries. As a result, an overestimation of non-mining tributary contributions may be found in the entire Thio River catchment and particularly in the upper part of the study area. Third, the properties measured in the Koua tributary (i.e. draining Camps des Sapins Mine) samples were not comprised in the ranges of values covered by the artificial mixture samples (Figure 9).

Given the particular colour signature of this tributary (Figure 11), its contributions are therefore not taken into account at all by the FDVS-PLSR models. Indeed, the sums of the source contributions by FDVS-PLSR models are lower than the expected 100% particularly in the uppermost part of the catchment (Tables 4 and 5), which may indicate that a source is not accounted for. Artificial mixtures were constructed from a homogenized spectral signature of all mining source samples. However, two distinct spectral signatures were observed between the upstream and downstream mining source samples. Homogenizing the spectral signature of the mining samples led to a loss of information in terms of spectral signature, in particular that of the mining samples located upstream. As a result, a 3-source FDVS-PLSR models (i.e. non-mining, upstream and downstream mining sources) would have been more appropriate than 2-source FDVS-PLSR models in this context.

## 1.8. Spatial and temporal variations of sediment source contributions

Among the four models tested in this study, the 'colour + geochemistry' model is the most appropriate to estimate mining and non-mining tributary contributions in the Thio River catchment. According to the results of this model, mining tributaries provided the main sediment supply to the river system with a mean contribution of 68 % (SD 25 %) for the 2015 flood event and 88 % (SD 8 %) for the 2017 flood event (Tables 4 and 5). The variability of mining tributary contributions between these two flood events with a return period of 10 years ( $3500 \text{ m}^3 \text{ s}^{-1}$ ) could be explained in particular by the variability of rainfall distribution (Sellier et al., 2019). Indeed, during the 2015 flood event, the



612 Kouaré River sub-catchment received twice the rainfall than observed in the rest of the Thio River  
613 catchment, which may explain a higher contribution of non-mining tributaries for this event than for  
614 the 2017 flood event where rainfall was more intense on the eastern part of the catchment in the  
615 vicinity of the mines currently in operation (Thio Plateau, Camps des Sapins).

616 Although the FDVS-PLSR models were unable to properly estimate the source contributions,  
617 they provided qualitative indications about the proportion of sediment contribution between  
618 'Upstream' and 'Downstream' mining tributaries at the level of the estuary. Indeed, only  
619 'downstream' mining tributaries were finally identified by the FDVS-PLSR models as mining sources.  
620 Mining contributions gradually increased in downstream direction. The predicted proportion sums of  
621 river sediment samples also tend to reach the expected 100%, which could result in a better  
622 predictability of the models. As a result, these models indicated that sediment contribution from  
623 downstream reaches dominated that of upstream reaches at the level of the estuary for both events.

624 Moreover, the analysis of colour parameters coupled to that of geochemical elements  
625 highlighted the occurrence of three sub-groups of mining tributary samples, (1) 'Downstream'  
626 samples characterized by high  $a^*$  values and low K contents, (2) 'Koua tributary' samples located in  
627 the upstream characterized by low  $a^*$  values and low K contents and (3) 'Thio upstream' samples  
628 corresponding to a mix of both dominant lithologies (i.e. peridotite massifs and volcano-sedimentary  
629 formations) characterized by low  $a^*$  values and higher K contents (i.e. 4 times higher than for the  
630 two previous sub-groups) (Figure 11). Owing to the low K contents found in Thio River sediment  
631 samples collected in the uppermost part (i.e.  $\sim 2200 \text{ mg kg}^{-1}$  in 2015 and  $\sim 2600 \text{ mg kg}^{-1}$  in 2017),  
632 which were similar to those measured in samples of sub-group (2,  $\sim 2400 \text{ mg kg}^{-1}$ ), it would appear  
633 that the Koua tributary draining Camps des Sapins mine dominated the sediment supply in the  
634 upstream for both events.



## 635 Conclusions

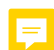

636       The current study showed that the contributions of mining sources dominated the sediment  
637 inputs with mean contributions of 68 % (SD 25 %) for the 2015 flood event and 88 % (SD 8 %) for the  
638 2017 flood event (results of 'colour + geochemistry' model). Although the spatial variability of rainfall  
639 may impact local sediment source contributions, a trend in terms of sediment source contributions is  
640 observed along the Thio River for both flood events. In the uppermost part of the catchment, mining  
641 source contributions dominated (99% in 2015, 100% in 2017) with a dominant contribution from the  
642 Koua tributary draining the Camps des Sapins mine. The first non-mining tributary encountered in  
643 downstream direction (i.e. the Kouergoa tributary) contributed little to sediment supply; it is rather  
644 the next non-mining tributaries (i.e. the Kouaré tributary) which provided most of the sediment  
645 inputs (83 % in 2015, 26 % in 2017). Nevertheless, these contributions were compensated in  
646 downstream direction by those from mining sources generated by tributaries draining Thio Plateau  
647 mine. Finally, at the estuary, mining sources dominated (58-70% in 2015, 83-85 % in 2017). These  
648 results therefore suggest that catchment management should focus on mining tributaries draining  
649 active mining sites (i.e. Camps des Sapins and the Thio Plateau).

650       One of the objectives of this study was to evaluate the performance of sediment tracing  
651 methods based on spectroscopy measurements (i.e. colour parameters and FDVS). The results  
652 showed that these individual fingerprinting approaches did not provide sufficient discrimination  
653 between sources to be used for the modelling of sediment source contributions. Nevertheless, the  
654 inclusion of colour properties in addition to geochemical parameters turned out to be the optimal  
655 combination of tracers providing the highest discrimination between sediment sources. This 'colour +  
656 geochemistry' model is, however largely based on the discriminatory power provided by K, which  
657 means that the 'geochemistry' approach is also relevant to quantify sediment sources. Both  
658 approaches have, moreover, been experimentally validated. As a result, the use of these approaches  
659 could be extended to other mining catchments of New Caledonia but also to other similar nickel





660 mining catchments (i.e. Ni oxidized ores based on peridotite massifs) around the world (e.g.  
661 Australia, Brazil, Dominican Republic, Cuba).

#### 662 **Data availability**

663 The database has been registered on the PANGAEA website and is currently undergoing the editorial  
664 process: <https://issues.pangaea.de/browse/PDI-25229>.

#### 665 **Author contribution**

666 Oldrich Navratil, Michel Allenbach and Olivier Evrard designed research. Virginie Sellier, Oldrich  
667 Navratil, Olivier Evrard and Irène Lefèvre carried out fieldwork sampling. Virginie Sellier conducted the  
668 analyses. All co-authors contributed to data analysis and interpretation. John Patrick Laceby  
669 contributed to modelling. All co-authors contributed to the writing and approved the final version of  
670 the manuscript.

#### 671 **Competing interests**

672 The authors declare that they have no conflict interest.

#### 673 **Acknowledgements**

674 This work was funded by the National Technical Research Center (CNRT) “Nickel and Its  
675 Environment”, Noumea, New Caledonia » (n°10PS2013-CNRT.UNC/IMMILA). The PhD project of  
676 Virginie Sellier is also financed by the French Atomic Energy Commission (CEA, Commissariat à  
677 l’Energie Atomique et aux Energies Alternatives). The authors are grateful to Jean-Guy M’Boueri,  
678 Pierre Chanel, Jean-Jean, Lorenza M’Boueri, Nicole Mathys for their invaluable support to identify  
679 and have access to the field sampling sites.

680



## 681 References

- 682 Abel, A., Michael, A., Zartl, A., and Werner, F.: Impact of erosion-transported overburden dump  
 683 materials on water quality in Lake Cospuden evolved from a former open cast lignite mine south of  
 684 Leipzig, Germany, *Environmental Geology*, 39, 683-688, 2000.
- 685 Baudrimont, M., Dominique, Y., Feurtet-Mazel, A., Gonzalez,  Gourvès, P.-Y., Gunkel-Grillon, P.,  
 686 Laporte-Magoni, C., Lefrançois, E., Letourneur, Y., Marquié, J., Maury-Brachet, R., Monna, F.,  
 687 Pasquet, C., Rivière, E., and Roth, E.: - Rapport scientifique final. Programme « Dispersion des métaux  
 688 de la mine au lagon. ». CNRT « Nickel & son environnement ». 192 pages, 2019.
- 689 Bird, E. C. F., Dubois, J. P., and Itlis, J. A.: The impacts of opencast mining on the rivers and coasts of  
 690 New Caledonia. Tokyo, Japan, United Nations University, 1984.
- 691 Blake, W. H., Wallbrink, P. J., Wilkinson, S. N., Humphreys, G. S., Doerr, S. H., Shakesby, R. A., and  
 692 Tomkins, K. M.: Deriving hillslope sediment budgets in wildfire-affected forests using fallout  
 693 radionuclide tracers, *Geomorphology*, 104, 105-116, 10.1016/j.geomorph.2008.08.004, 2009.
- 694 Bradley, S., and Lewin, J.: Transport of heavy metals on suspended sediments under high flow  
 695 conditions in a mineralised region of Wales, *Environmental Pollution Series B, Chemical and Physical*,  
 696 4, 257-267, 1982.
- 697 Brosinsky, A., Foerster, S., Segl, K., and Kaufmann, H.: Spectral fingerprinting: sediment source  
 698 discrimination and contribution modelling of artificial mixtures based on VNIR-SWIR spectral  
 699 properties, *Journal of soils and sediments*, 14, 1949-1964, 2014.
- 700 Collins, A., Walling, D., and Leeks, G.: Use of the geochemical record preserved in floodplain deposits  
 701 to reconstruct recent changes in river basin sediment sources, *Geomorphology*, 19, 151-167, 1997.
- 702 Collins, A. L., Walling, D. E., and Leeks, G. J. L.: Composite fingerprinting of the spatial source of fluvial  
 703 suspended sediment : a case study of the Exe and Severn river basins, United Kingdom,  
 704 *Géomorphologie*, 2, 41-53, 10.3406/morfo.1996.877, 1996.
- 705 Danloux, J., and Laganier, R.: Classification et quantification des phénomènes d'érosion, de transport  
 706 et de sédimentation sur les bassins touchés par l'exploitation minière en Nouvelle Calédonie, 1991.
- 707 Daszykowski, M., Walczak, B., and Massart, D.: Representative subset selection, *Analytica chimica*  
 708 *acta*, 468, 91-103, 2002.
- 709 Debret, M., Sebag, D., Desmet, M., Balsam, W., Copard, Y., Mourier, B., Susperrigui, A.-S., Arnaud, F.,  
 710 Bentaleb, I., and Chapron, E.: Spectrocolorimetric interpretation of sedimentary dynamics: the new  
 711 "Q7/4 diagram", *Earth-Science Reviews*, 109, 1-19, 2011.
- 712 Dumas, P., Printemps, J., Mangeas, M., and Luneau, G.: Developing erosion models for integrated  
 713 coastal zone management: A case study of The New Caledonia west coast, *Marine Pollution Bulletin*,  
 714 61, 519-529, 2010.
- 715 Evrard, O., Laceby, J. P., Huon, S., Lefèvre, I., Sengtaheuanghoung, O., and Ribolzi, O.: Combining  
 716 multiple fallout radionuclides ( $^{137}\text{Cs}$ ,  $^7\text{Be}$ ,  $^{210}\text{Pbxs}$ ) to investigate temporal sediment source  
 717 dynamics in tropical, ephemeral riverine systems, *J Soils Sediments*, 16, 1130-1144, 10.1007/s11368-  
 718 015-1316-y, 2015.
- 719 Evrard, O., Durand, R., Foucher, A., Tiecher, T., Sellier, V., Onda, Y., Lefèvre, I., Cerdan, O., and  
 720 Laceby, J. P.: Using spectrocolourimetry to trace sediment source dynamics in coastal catchments  
 721 draining the main Fukushima radioactive pollution plume (2011–2017), *Journal of Soils and*  
 722 *Sediments*, 1-12, 2019.
- 723 Evrard, O., Chaboche, P.-A., Ramon, R., Foucher, A., and Laceby, J. P.: A global review of sediment  
 724 source fingerprinting research incorporating fallout radiocesium ( $^{137}\text{Cs}$ ), *Geomorphology*, 107103,  
 725 2020.
- 726 Garcin, M.: Exploitation des granulats en lit vif des cours d'eau de la Grande-Terre, Nouvelle-  
 727 Calédonie. BRGM/RP-58531-FR. 114 p., 90 fig., 3 tabl., Bureau des Recherches Géologiques et  
 728 Minières 2010.



- 279 Garcin, M., Gastaldi, Y., and Lesimple, S.: Quantification et évolution temporelle des apports miniers  
 280 dans les rivières calédoniennes. BRGM/RP-66840-FR, 44 p., 23 fig., 5, Bureau des Recherches  
 281 Géologiques et Minières
- 282 2017.
- 283 Hedouin, L., Pringault, O., Metian, M., Bustamante, P., and Warnau, M.: Nickel bioaccumulation in  
 284 bivalves from the New Caledonia lagoon: Seawater and food exposure, *Chemosphere*, 66, 1449-1457,  
 285 2007.
- 286 Highley, D., Chapman, G. R., and Bonel, K.: The economic importance of minerals to the UK, British  
 287 Geological Survey, 2004.
- 288 Ittis, J.: La mine, élément de la controverse écologique dans le Pacifique Sud, *L'Espace géographique*,  
 289 193-205, 1992.
- 290 Juillot, F.: – Rapport scientifique final. Programme « Dynamique des métaux de la mine au lagon ».   
 291 CNRT « Nickel & son environnement ». 202 pages., 2019.
- 292 Klages, M., and Hsieh, Y.: Suspended Solids Carried by the Gallatin River of Southwestern Montana:  
 293 II. Using Mineralogy for Inferring Sources 1, *Journal of Environmental Quality*, 4, 68-73, 1975.
- 294 Laceby, J. P., and Olley, J.: An examination of geochemical modelling approaches to tracing sediment  
 295 sources incorporating distribution mixing and elemental correlations, *Hydrol. Process.*, 29, 1669-  
 296 1685, 10.1002/hyp.10287, 2015.
- 297 Laceby, J. P., Evrard, O., Smith, H. G., Blake, W. H., Olley, J. M., Minella, J. P. G., and Owens, P. N.: The  
 298 challenges and opportunities of addressing particle size effects in sediment source fingerprinting: A  
 299 review, *Earth-Sci. Rev.*, 169, 85-103, 10.1016/j.earscirev.2017.04.009, 2017.
- 300 Legout, C., Poulenard, J., Nemery, J., Navratil, O., Grangeon, T., Evrard, O., and Esteves, M.:  
 301 Quantifying suspended sediment sources during runoff events in headwater catchments using  
 302 spectrophotometry, *J Soils Sediments*, 13, 1478-1492, 10.1007/s11368-013-0728-9, 2013.
- 303 Mardhel, V., Iseppi, M., Regninger, P. A., and Sevin, B.: Connaissance de l'ophiolite, géophysique  
 304 aéroportée et étude de la structure. Rapport scientifique final. Programme « OPHIOSTRUCT ». CNRT  
 305 «Nickel & son environnement», 2018.
- 306 Martínez-Carreras, N., Udelhoven, T., Krein, A., Gallart, F., Iffly, J. F., Ziebel, J., Hoffmann, L., Pfister,  
 307 L., and Walling, D. E.: The use of sediment colour measured by diffuse reflectance spectrometry to  
 308 determine sediment sources: application to the Attert River catchment (Luxembourg), *J Hydrol*, 382,  
 309 49-63, 2010.
- 310 Pascal, N.: Ecosystèmes coralliens de Nouvelle-Calédonie. Valeur économique des services  
 311 écosystémiques. Partie I: Valeur financière. IFRECOR., 2010.
- 312 Poulenard, J., Perrette, Y., Fanget, B., Quetin, P., Trevisan, D., and Dorioz, J.-M.: Infrared  
 313 spectroscopy tracing of sediment sources in a small rural watershed (French Alps), *Science of the*  
 314 *Total Environment*, 407, 2808-2819, 2009.
- 315 Poulenard, J., Legout, C., Nemery, J., Bramorski, J., Navratil, O., Douchin, A., Fanget, B., Perrette, Y.,  
 316 Evrard, O., and Esteves, M.: Tracing sediment sources during floods using Diffuse Reflectance  
 317 Infrared Fourier Transform Spectrometry (DRIFTS): A case study in a highly erosive mountainous  
 318 catchment (Southern French Alps), *Journal of Hydrology*, 414, 452-462, 2012.
- 319 Prior, T., Daly, J., Mason, L., and Giurco, D.: Resourcing the future: Using foresight in resource  
 320 governance, *Geoforum*, 44, 316-328, 2013.
- 321 Rossel, R. V., Walvoort, D., McBratney, A., Janik, L. J., and Skjemstad, J.: Visible, near infrared, mid  
 322 infrared or combined diffuse reflectance spectroscopy for simultaneous assessment of various soil  
 323 properties, *Geoderma*, 131, 59-75, 2006.
- 324 Sellier, V., Navratil, O., Laceby, J. P., Allenbach, M., Lefèvre, I., and Evrard, O.: Investigating the use of  
 325 fallout and geogenic radionuclides as potential tracing properties to quantify the sources of  
 326 suspended sediment in a mining catchment in New Caledonia, South Pacific, *Journal of Soils and*  
 327 *Sediments*, 1-17, 2019.



- 778 Shellberg, J., Brooks, A., and Spencer, J.: Land-use change from indigenous management to cattle  
 779 grazing initiates the gulying of alluvial soils in northern Australia, 19th World Congress of Soil  
 780 Science: Soil Solutions for a Changing World, 2010, 1-6,  
 781 Sherriff, S. C., Franks, S. W., Rowan, J. S., Fenton, O., and Ó'hUallacháin, D.: Uncertainty-based  
 782 assessment of tracer selection, tracer non-conservativeness and multiple solutions in sediment  
 783 fingerprinting using synthetic and field data, *J Soils Sediments*, 15, 2101-2116, 10.1007/s11368-015-  
 784 1123-5, 2015.  
 785 Smith, H. G., Sheridan, G. J., Lane, P. N. J., Noske, P. J., and Heijnis, H.: Changes to sediment sources  
 786 following wildfire in a forested upland catchment, southeastern Australia, *Hydrol. Process.*, 25, 2878-  
 787 2889, 10.1002/hyp.8050, 2011.  
 788 Surell, A.: Étude sur les torrents des Hautes-Alpes, Carilian-Goeury, 1841.  
 789 Tiecher, T., Caner, L., Minella, J. P., and dos Santos, D. R.: Combining visible-based-color parameters  
 790 and geochemical tracers to improve sediment source discrimination and apportionment, *Sci Total*  
 791 *Environ*, 527-528, 135-149, 10.1016/j.scitotenv.2015.04.103, 2015.  
 792 Uber, M., Legout, C., Nord, G., Crouzet, C., Demory, F., and Poulenard, J.: Comparing alternative  
 793 tracing measurements and mixing models to fingerprint suspended sediment sources in a mesoscale  
 794 Mediterranean catchment, *Journal of Soils and Sediments*, 1-19, 2019.  
 795 Vaithyanathan, P., Ramanathan, A., and Subramanian, V.: Transport and distribution of heavy metals  
 796 in Cauvery River, *Water, Air, and Soil Pollution*, 71, 13-28, 1993.  
 797 Walden, J., Slattery, M. C., and Burt, T. P.: Use of mineral magnetic measurements to fingerprint  
 798 suspended sediment sources: approaches and techniques for data analysis, *Journal of Hydrology*,  
 799 202, 353-372, 1997.  
 800 Wallbrink, P., Murray, A., Olley, J., and Olive, L.: Determining sources and transit times of suspended  
 801 sediment in the Murrumbidgee River, New South Wales, Australia, using fallout <sup>137</sup>Cs and <sup>210</sup>Pb,  
 802 *Water Resour Res*, 34, 879-887, 1998.  
 803 Wallbrink, P. J.: Quantifying the erosion processes and land-uses which dominate fine sediment  
 804 supply to Moreton Bay, Southeast Queensland, Australia, *Journal of environmental radioactivity*, 76,  
 805 67-80, 2004.  
 806 Walling, D., Peart, M., Oldfield, F., and Thompson, R.: Suspended sediment sources identified by  
 807 magnetic measurements, *Nature*, 281, 110, 1979.  
 808 Yellishetty, M., Mudd, G. M., and Shukla, R.: Prediction of soil erosion from waste dumps of opencast  
 809 mines and evaluation of their impacts on the environment, *International Journal of Mining,*  
 810 *Reclamation and Environment*, 27, 88-102, 2013.

811
