# Supplementary material for: Combining colour parameters and geochemical tracers to improve sediment source discrimination in a mining catchment (New Caledonia, South Pacific Islands)
Source: Copernicus journal article supplement (doi:10.5194/soil-2020-48), 2020-08-17
Supplement: Supplementary file [file soil-2020-48-RC2-supplement.pdf]

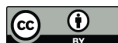

1 **Combining colour parameters and geochemical tracers to improve sediment source discrimination**  
2 **in a mining catchment (New Caledonia, South Pacific Islands)**

3 Virginie Sellier<sup>1</sup>, Oldrich Navratil<sup>2</sup>, John Patrick Lacey<sup>3</sup>, Cédric Legout<sup>4</sup>, Michel Allenbach<sup>5</sup>, Irène

4 Lefèvre<sup>1</sup>, Olivier Evrard<sup>1</sup>

5 <sup>1</sup>Laboratoire des Sciences du Climat et de l'Environnement (LSCE), UMR 8212 (CEA/CNRS/UVSQ-IPSL),

6 Université Paris-Saclay, Gif-sur-Yvette (France)

7 <sup>2</sup>Laboratoire Environnement Ville Société (EVS), Université Lumière Lyon 2, UMR 5600 (CNRS), Lyon

8 (France)

9 <sup>3</sup>Alberta Environment and Parks, Calgary, Alberta (Canada)

10 <sup>4</sup>Institut des Géosciences de l'Environnement (IGE), UMR 5001, Grenoble (France)

11 <sup>5</sup>LIVE-EA 4243, Université de Nouvelle-Calédonie & LABEX Corail, Nouméa (Nouvelle-Calédonie,

12 France)

13 **Corresponding author:** selliervirg@free.fr ; Tel: (33)673910072



14           **Abstract**

15           Over the last century, human activities have induced significant land-cover changes that have  
16 accelerated soil erosion processes around the world. In New Caledonia, a French island located in the  
17 south-west Pacific Ocean, open-cast nickel mining has raised many concerns regarding its impact on  
18 riverine systems (i.e. hyper-sedimentation, overburden) and the island's ecosystems (i.e. flooding,  
19 lagoon siltation, water pollution).

20           A sediment tracing study has been conducted to quantify the contribution of mining versus  
21 non-mining sub-catchments in one of the first areas exploited for nickel mining, the Thio River  
22 catchment (397 km<sup>2</sup>). Sediment deposited during two cyclonic events (i.e. 2015 and 2017) was  
23 collected following a tributary design approach. Source (n= 24) and river sediment (n= 19) samples  
24 were analyzed by X-ray fluorescence and spectroscopy in the visible spectra (i.e. 365-735 nm). Four  
25 fingerprinting approaches based on (1) colour parameters, (2) geochemical properties, (3) colour  
26 parameters coupled with geochemical properties and (4) the entire visible spectrum were tested to  
27 estimate sediment source contributions.

28           The results demonstrated that the individual sediment tracing methods based on spectroscopy  
29 measurements (i.e. (1) and (4)) did not provide sufficient discrimination between sources. However,  
30 the inclusion of colour properties in addition to geochemical parameters (3) provided the highest  
31 discrimination between sources (i.e. 92.6 % of source variance explained). Although with a slightly  
32 lower discrimination potential (i.e. 83.1 % of variance explained in sources), the geochemical  
33 approach (2) provided similar results to those obtained with the colour coupled with geochemical  
34 approach (3). In addition, mixed linear models associated with these two approaches have been  
35 experimentally validated with artificial mixture samples. The results obtained with model (3) showed  
36 that mining source contributions strongly dominated the sediments inputs with a mean contribution  
37 of 68 % (SD 7 %) for the 2015 flood event and 88 % (SD 8%) for the 2017 flood event. These results  
38 suggest that catchment management should focus on the contributions of mining tributaries to

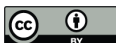

39 reduce sediment inputs in the river systems. Therefore, the use of these approaches based on  
40 geochemical properties individually (2) and coupled to colour parameters (3) could be extended to  
41 other mining catchments of New Caledonia but also to other similar nickel mining catchments  
42 around the world (e.g. Australia, Brazil, Dominican Republic, Cuba) to estimate sediment source  
43 apportionment.

44

45 **Keywords:** Nickel mining • Sediment source fingerprinting • Soil erosion • Modeling

46



47 Introduction

48 At the dawn of a fourth industrial revolution, demand for metalliferous minerals continues to  
49 increase and impact the world market (Prior et al., 2013;Highley et al., 2004). Currently, open-cast  
50 mining generates more than three-quarters of the world's metal ores. However, the extraction of  
51 these minerals is associated with deleterious impacts on the environment. In particular, these mines  
52 are responsible for the increase in soil erosion and the transfer of sediment in river systems  
53 worldwide (Yellishetty et al., 2013;Dumas et al., 2010;Abel et al., 2000).

54 New Caledonia, an island located in the south-western Pacific Ocean and currently the world's  
55 sixth-largest producer of nickel, is in particular challenged with the problems of hyper-sedimentation  
56 and over-burden of its river systems. Several studies outline how mining activities, which started in  
57 1875, are generally responsible for these deleterious river morphological changes (Bird et al.,  
58 1984;Iltis, 1992;Garcin et al., 2017). The excessive sediment inputs transferred mainly during  
59 extreme rainfall events (e.g. cyclones and tropical depressions) lead to the increased occurrence of  
60 flooding events in these tropical regions. Owing to the occurrence of major cyclones in New  
61 Caledonia (i.e. on average one cyclone every 2.7 years (Garcin, 2010)), the local population regularly  
62 have to deal with the damage generated by these flood events (e.g. damage to human settlements,  
63 public infrastructure, agricultural land and, human casualties). Moreover, the island's agricultural and  
64 fishing resources are also impacted.

65 Suspended sediment is known to transport large quantities of contaminants in river systems  
66 (Vaithyanathan et al., 1993;Bradley and Lewin, ). Hedouin et al. (2007), and more recently  
67 Baudrimont et al. (2019), observed high concentrations of trace metals, including Ni and Cr, in  
68 marine and freshwater organisms in New Caledonia. On a more global level, this anthropogenic  
69 activity also threatens the second largest coral reef in the world, listed as a UNESCO World Heritage.  
70 In particular, the increased turbidity associated with sediment supply could disrupt coral metabolism  
71 (i.e. photosynthetic processes) (Juillot, 2019). These coral reefs provide an exceptional biological



72 diversity and deliver several essential ecosystem services to the local population including fisheries,  
73 coastal protection and tourism (Pascal, 2010). The implementation of effective and perennial  
74 sediment control measures on mining sites (e.g. sediment retention basin, revegetation) is therefore  
75 required to reduce sediment inputs into the lagoon.

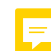

76 Erosion generated by open-cast nickel mining (i.e. mining bare soil, mining roads, mining  
77 prospection and mining waste) do not provide the only sediment source in New Caledonia's mining  
78 catchments. The use of fires to clear landscapes conducted by the local population for farming,  
79 pasture and hunting increase the area of bare soils (Dumas et al., 2010). Soils that are left uncovered  
80 by vegetation are more sensitive to erosion and they may be exposed to shallow landsliding (Blake et  
81 al., 2009; Smith et al., 2011). Moreover, several invasive species such as deers or wild pigs also  
82 threaten soil stability through trampling and overgrazing (Shellberg et al., 2010).

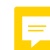

83 The contribution of mining tributaries (i.e. draining mining areas) and non-mining tributaries  
84 (i.e. draining areas without mining activities) to sediment transiting catchments in New Caledonia  
85 therefore needs to be discriminated. This discrimination has particularly become important since the  
86 mining industries are subject to the "polluter pays" principle applied since 1975, i.e. the obligation to  
87 fund remediation according to the extent of the damage generated by mining activity on the  
88 environment. There is therefore a real social, environmental and financial challenge in discriminating  
89 between sediment sources generated by mining activities and other potential sediment sources.

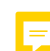

90 Sediment fingerprinting techniques have been developed since the 1970s to determine the  
91 spatial origin of sediment sources and quantify their contributions (Collins et al., 1996; Walling et al.,  
92 1979). These techniques are based on the analysis of multiple conservative properties both in the  
93 sediments and their potential sources. Fallout radionuclides (Wallbrink, 2004; Evrard et al.,  
94 2015; Wallbrink et al., 1998; Evrard et al., 2020), geochemical (Collins et al., 1997; Laceby and Olley,  
95 2015) and mineral properties (Klages and Hsieh, 1975; Walden et al., 1997) are the most frequently  
96 used tracers to quantify sediment source contributions. The use of fallout radionuclides and

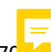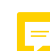



97 geochemical properties as potential tracers was investigated to quantify the sources of suspended  
98 sediment in the Thio River catchment (397 km<sup>2</sup>), one of the first catchments in New Caledonia to be  
99 mined for nickel. Geochemical properties provided promising results (i.e. 83.1 % of variance  
100 explained in sources) while the fallout radionuclides proved to be unsuitable (i.e. non-discriminatory)  
101 (Sellier et al., 2019). However, other less expensive, faster and possibly more efficient techniques  
102 than the more conventional methods previously tested could be envisaged. For example,  
103 spectroscopy in the mid-infrared (MIR) (Poulenard et al., 2009), the visible near-infrared (VNIR) and  
104 the shortwave-infrared (SWIR) (Brosinsky et al., 2014) **regions of spectra** have been used to quantify  
105 **the** sediment source contributions. **It is** also non-destructive and requires low quantities of sample  
106 material. Spectroscopy could therefore meet both the need for a simple and rapid sediment tracing  
107 method in a context where flood events are frequent.

108 **Moreover**, New Caledonia has a specific geological feature which is at the origin of its mineral  
109 wealth: one third of its surface area is covered with peridotite massifs. The weathering of these rocks  
110 enriched in Fe and transition metals such as Mn, Cr and Co results in the formation of Ni- and Fe-  
111 rich smectite, serpentine, goethite and hematite. The oxidized minerals (i.e. goethite and hematite)  
112 provide a particularly reddish-orange colour to mining sources that distinguishes them from non-  
113 mining sources, which tend to be grey in colour. The differences made visually between the two  
114 sources further encourage the analysis of sources by spectroscopy and especially spectroscopy in the  
115 visible region of the spectrum (i.e. 365-735 nm). In particular, the colorimetric parameters derived  
116 from the visible spectrum have been shown to be effective in discriminating sediment sources. Their  
117 discrimination power has been tested both individually (Evrard et al., 2019; Martínez-Carreras et al.,  
118 2010; Uber et al., 2019) and in combination with other tracers (e.g. geochemical properties (Tiecher  
119 et al., 2015)) according to the conventional fingerprinting approach (i.e. statistical analysis and use of  
120 a mixing model). A more alternative approach based on the entire visible spectrum with the partial  
121 least square regression (PLSR) models has also been developed to trace origin of sediment sources in  
122 the literature (Legout et al., 2013; Tiecher et al., 2015).



123 As part of this study, four sediment fingerprinting methods based on (1) colour parameters, (2)  
124 geochemical properties, (3) colour parameters coupled with geochemical properties and (4) PLSR  
125 models based on the whole visible spectrum were tested in the Thio River catchment. Source (n=24)  
126 and river sediment (n=19) samples were collected following a tributary design approach and  
127 analyzed by X-ray fluorescence and spectroscopy in the visible spectra (i.e. 365-735 nm). The  
128 performance of each method to estimate sediment source contributions was evaluated in order to  
129 select the best technique to be applied in the Thio River catchment and possibly in other mining  
130 catchments of New Caledonia. On a wider scale, the tracers retained in this study could be  
131 considered as potential sedimentary tracers to estimate sediment source apportionment in other  
132 similar nickel mining catchments around the world (e.g. Australia, Brazil, Dominican Republic, Cuba).

133 Materials and methods

#### 134 1.1. Study area

135 Located in the southwestern Pacific Ocean, New Caledonia (18 500 km<sup>2</sup>) is made up of several  
136 islands, the largest of which is *La Grande Terre* (17 000 km<sup>2</sup>). The Thio River catchment (397 km<sup>2</sup>) is  
137 located on the east coast of this island (Figure 1-a). It has a mountainous relief, with an average  
138 altitude of 416 m above sea level (i.e. minimum: 0 m, maximum: 1392 m, Figure 1-a) and an average  
139 slope of 45%. Two dominant lithologies are present in the catchment: volcano-sedimentary  
140 formations mainly located on the western part of the catchment and peridotite massifs concentrated  
141 in the eastern part of the catchment. Cherts (22 %), sandstone (9 %), a mix of basalt, dolerite and  
142 gabbro (6 %), polymetamorphic rocks (6 %) mainly constitute volcano-sedimentary formations  
143 whereas peridotite massifs are composed of laterites (18 %), peridotites (17 %), serpentines (10 %)  
144 and hazburgites (1 %) (Garcin et al., 2017) (Figure 1-b). The Thio River catchment is covered on 96%  
145 of its surface by permanent vegetation. According to the mining registry, active and abandoned  
146 mining sites and exploration cover 21 % of the catchment area (Figure 1-c).



147           The Thio River catchment is subject to a tropical climate characterized by the alternation of a  
148 hot wet season (November-April; mean temperature of 27 °C) and a cooler dry season (May-October;  
149 mean temperature of 20 °C). The mean annual rainfall in the Thio River catchment is 1620 mm  
150 despite strong seasonal fluctuations with the highest levels of precipitation recorded during the  
151 cyclonic season between January and March (700 mm, 1981-2008; Alric (2009)). Although they only  
152 occur on average once every 2.7 years, cyclones or tropical depressions may supply more than 20 %  
153 of the annual rainfall in only one day according to local meteorological records (Météo France).

154  
155           Twelve major tributaries flow into the main stem of the Thio River (28 km long) (Figure 1-b).  
156 Ninety-two percent of the river channel length are characterized with slopes lower than 5 %.  
157 According to Surell's classification (1841), the Thio River can be considered as torrential except in its  
158 estuarine section. In addition, the extensive bare soil surface associated with past mining activities  
159 (~10 sites), ongoing mining operations (e.g. 2 sites: Thio Plateau, Camps des Sapins) and the  
160 occurrence of 6 km<sup>2</sup> of mining roads exacerbate runoff production as they contribute to increased  
161 river network connectivity (Alric, 2009). This generates extensive erosion processes that are evident  
162 across the entire Thio catchment with the widespread occurrence of rills, gullies, landslides and  
163 channel bank erosion (Danloux and Laganier, 1991).

164

165



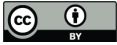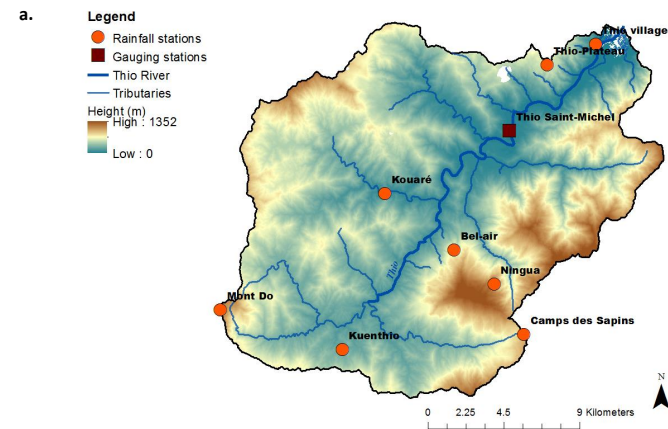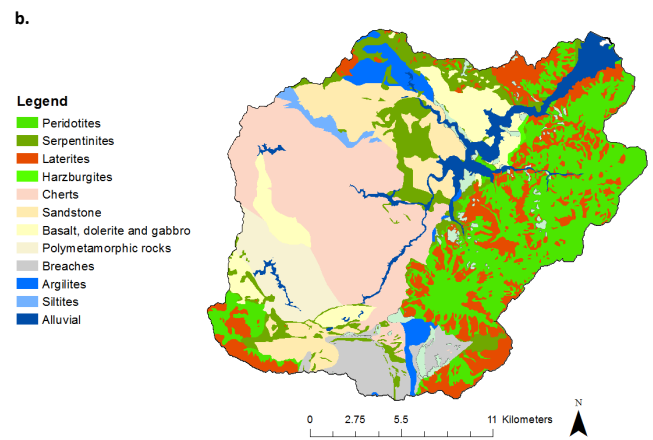

166

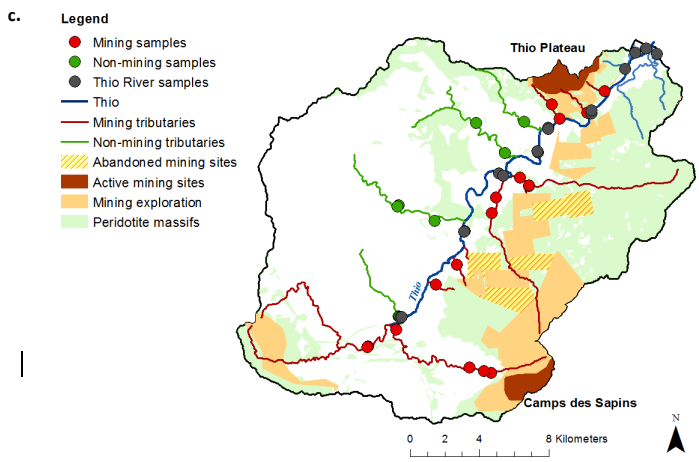

**Figure 1** Location of the rainfall and river monitoring stations (a), main lithologies (b) and location of the sediment samples collected along with tributary source classifications (c) conducted in the Thio River catchment, New Caledonia

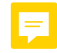



169 **1.2. Hydro-sedimentary monitoring**

170 Three rainfall stations (Thio Plateau, Thio village, Camps des Sapins; Figure 1-b) are operated  
171 by Météo France and five others are managed by the DAVAR (Direction des Affaires Vétérinaires  
172 Alimentaires et Rurales; i.e. Kouaré, Bel-Air, Ningua, Kuenthio, Mont Do), with daily records available  
173 since 1952 for some stations (e.g. Thio village). Daily discharge has been monitored at a river gauging  
174 station located on the main stem of the Thio River (at Saint-Michel) since 1981 by the DAVAR (Figure  
175 1-a).

176 **1.3. Sources and river sediment sampling**

177 To trace the origin of sediment, lag deposits were collected as an alternative of suspended  
178 sediment sampling on channel bars of mining tributaries (n= 16), non-mining tributaries (n= 8) and  
179 the Thio River (n= 19) according to the tributary approach recommended by Lacey et al. (2017)  
180 (Figure 1-c). They were sampled after two major floods (~10 year return period): (1) the tropical  
181 depression of February 25, 2015 (n= 31) and (2) Cyclone Cook on April 10, 2017, (n= 12). These two  
182 sample sets were respectively sampled between April 30 and May 5, 2015 and between May 16 and  
183 17, 2017. At each sampling site, five to ten subsamples of fine sediment were collected across a 10  
184 m<sup>2</sup> surface with a plastic trowel at exposed subaerial sites free of vegetation on channel bars. The  
185 subsamples were composited into one sample representative of the fine sediment deposited on the  
186 channel bars. The samples were oven-dried at 40°C for ~48 hours and sieved to 63 µm.

187 **1.4. Preparation of artificial mixture samples**

188 Equal quantities of all mining source samples (n= 16) were collected and mixed together to  
189 create a composite sample of mining sources. The same process was carried out with non-mining  
190 source samples (n= 8). The two composite samples respectively corresponding to mining and non-  
191 mining sources were then mixed in known proportions to create artificial mixture samples (n= 21, 0-  
192 100 % with a 5 % step, Table 1).

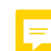



193 **Table 1** Proportions of mining and non-mining sources (%) in artificial mixture samples ( $M_i$ ).  $M_6$  was  
194 *withdrawn from this study because an error occurred at the time of its completion (out of study).*

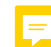

| $M_i$ | Proportions of mining sources (%) | Proportions of non-mining sources (%) |
|-------|-----------------------------------|---------------------------------------|
| M1    | 0                                 | 100                                   |
| M2    | 5                                 | 95                                    |
| M3    | 10                                | 90                                    |
| M4    | 15                                | 85                                    |
| M5    | 20                                | 80                                    |
| M6    | <i>25 (out of study)</i>          | <i>75 (out of study)</i>              |
| M7    | 30                                | 70                                    |
| M8    | 35                                | 65                                    |
| M9    | 40                                | 60                                    |
| M10   | 45                                | 55                                    |
| M11   | 50                                | 50                                    |
| M12   | 55                                | 45                                    |
| M13   | 60                                | 40                                    |
| M14   | 65                                | 35                                    |
| M15   | 70                                | 30                                    |
| M16   | 75                                | 25                                    |
| M17   | 80                                | 20                                    |
| M18   | 85                                | 15                                    |
| M19   | 90                                | 10                                    |
| M20   | 95                                | 5                                     |
| M21   | 100                               | 0                                     |

195

### 196 1.5. Source, river sediment and artificial mixture sample analyses

197 A portable diffuse reflectance spectrophotometer (Konica Minolta 2600d) was used to  
198 measure the spectra in the visible (365-735 nm with a 10-nm resolution, 39-wavelength class) on  
199 Thio River sediment ( $n= 19$ ), tributary source ( $n= 16$ ) and artificial mixture samples ( $n= 20$ ). Sample  
200 quantities between 0.1 g and 4 g were stored in 60 mL polystyrene tubes and analyzed at the Institut  
201 des Géosciences de l'Environnement (IGE, Grenoble, France). Because of the rather small measuring  
202 area (i.e. 3-mm radius circle), and to take into account the possible heterogeneity within the  
203 samples, three measurements were carried out on river sediment and sources samples. For artificial  
204 mixture samples, the experimenter who conducted the analyses carried out four measurements.  
205 Several parameters (i.e. D65 illuminant, 10° angle observer and specular component excluded) were

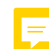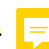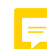



206 applied for each measurement. Raw data collected corresponds to the spectral reflectance  
207 percentage for each of the 39-wavelength class. From these raw data, 15 variables of various  
208 colorimetry models were derived. Among these components, XYZ tri-stimulus values were calculated  
209 based on the colour-matching functions defined by the International Commission on Illumination (CIE  
210 1931). The standardized tri-stimuli were then converted into CIE Lab and CIE Lu'v' cartesian coordinate  
211 systems using the equations provided by CIE (1976) and then into CIE Lch, CIE L\*a\*b\* cartesian  
212 coordinate systems using the equations provided by CIE (1994) (Rossel et al., 2006). First Derivative  
213 reflectance of the Visible Spectra (FDVS) of each sample was also derived from the initial reflectance  
214 spectrum. According to Tiecher et al. (2015), the use of FDVS avoids differences in baseline positions  
215 and to get rid of the small differences due to uncontrolled sources of variation, as sample packaging.

216 Measurements of 11 geochemical elements (i.e. Mg, Al, Si, K, Ca, Ti, Cr, Mn, Fe, Ni and Zn) on  
217 the samples were conducted by pre-calibrated energy dispersive X-ray fluorescence spectrometry  
218 (Epsilon 3, Malvern PANalytical) with certified reference samples including Internal Atomic Energy  
219 Agency (IAEA) standards ( $r^2 = 0.90-0.99$ , mean relative error: 9% ,SD 8 %, minimum: 1%, maximum:  
220 23%). Between 0.2 and 0.5 g of the samples were packed in small mass holder (SMH) cells with an air  
221 double X-ray Mylar film and analyzed at the Laboratoire des Sciences du Climat et de  
222 l'Environnement (LSCE, Gif-sur-Yvette, France). Samples were irradiated with a primary beam  
223 generated by an Rh anode X-ray tube emitting electromagnetic waves between 100eV and 1MeV  
224 with a maximum power, typical current and voltage fixed to 15 W, 3mA and 50 kV respectively. The  
225 associated Si-drift detector had a Be window thickness of 8  $\mu\text{m}$  and recorded the sample spectrum in  
226 a 2D optical geometry configuration. X-ray intensities were converted into concentrations using the  
227 Epsilon 3 software program through the application of the fundamental parameters method.

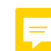



## 228 1.6. Statistical analysis and sediment tracing

### 229 1.6.1. Conventional mixing model

230 In general, the sediment source fingerprinting approach is composed of four main steps: (1)  
231 range test, (2) the Mann-Whitney U test, (3) a stepwise discriminant function analysis and (4) a  
232 mixing model (Collins et al., 1997) or the range test, all variables exhibiting values in the river  
233 sediment samples that were outside of the range found in the potential sources (i.e. between the  
234 minimum and maximum values found in source samples) were excluded from the analysis. It is  
235 important to restrict the tracing parameters to those that show a conservative behavior to avoid  
236 incorrect source prediction and consequently inaccurate estimations of source contributions (Sherriff  
237 et al., 2015). Thereafter, the Mann-Whitney U test ( $\alpha = 0.05$ , p-value  $< 0.01$ ) was performed to  
238 evaluate whether remaining variables could discriminate the source samples. A stepwise  
239 discriminant function analysis (DFA) was independently run on three set of potential tracing  
240 properties: (1) colour parameters (i.e. 'colour'), (2) geochemical properties (i.e. 'geochemistry') and  
241 (3) colour parameters and geochemical properties (i.e. 'colour + geochemistry'). For the last set, the  
242 raw values of the variables were normalized in order to make them comparable. Indeed, several  
243 colour parameters were within an order of magnitude of around 0.01 whereas for the geochemical  
244 parameters the difference was around  $10^6 \text{ mg kg}^{-1}$  which resulted in a poorly conditioned matrix for  
245 the DFA.

246 The following calculation was therefore applied on the variable values to normalize them:  $x_i -$   
247  $x_{\min} / x_{\max} - x_{\min}$  where  $x_i$  was value found in source sample (i),  $x_{\min}$  and  $x_{\max}$  were respectively the  
248 minimum and maximum values found in the source samples. The DFA was carried out to select the  
249 optimal number of potential tracers to discriminate the sources for each modelling approach with  
250 the optimal number of potential tracers which must provide the lowest Wilks' lambda value from  
251 analysis of variance. Indeed, the closer the Wilks' lambda value is to 1, the lower the variability within



252 the sources compared to the total variability. The DFA was performed in the backward mode with a p  
253 >0.01 used to select a tracer and p <0.01 used to remove a tracer.

254 Finally, a classical solver-based mixing model was used to model the source contributions from  
255 the mining and non-mining tributaries to target sediment through simultaneously minimizing the  
256 mixing model difference (MMD) (Evrard et al., 2019):

257 
$$MMD = \sum_{i=1}^n ((C_i - (A_i x + B_i(1 - x)))/C_i) \text{ Equation 1}$$

258 where n is the number of parameters in the model chosen by the selection process (i.e. steps 1, 2, 3);  
259  $C_i$  is the Thio River sediment sample parameter (i); x and (1-x) were respectively the contributions of  
260 source A and B (i.e. mining and non-mining tributaries);  $A_i$  is the mean of parameter (i) in source A  
261 and  $B_i$  is the mean of parameter (i) in source B. The proportional contribution from each source (x)  
262 was modelled by solving Equation 1 with the Solver Function in Microsoft Excel with x being between  
263 0 and 1 and the sum of source contributions (i.e. x and 1-x) equaling 1. The GRG Non-Linear solving  
264 method was used with automatic scaling in Solver, ignoring integer constraints, with a maximum run  
265 time of 5000 and allowing for 2500 iterations. A multi-start population size of 2500 was used along  
266 with the same random seed for each of the model runs while requiring bounds on the variables. A  
267 constraint precision and convergence of  $1.0 \cdot 10^{-6}$  were selected. To test the reliability of the 'colour',  
268 'geochemistry' and 'colour + geochemistry' models, these latter were tested on artificial mixture  
269 samples.

#### 270 1.6.2.FDVS- PLSR model

271 FDVS-PLSR models were built following the methodology described in Poulenard et al. (2012).  
272 The first step consisted in applying a principal component analysis (PCA) to evaluate the overall  
273 variability between  (i.e. 38 wavelengths) of source samples. Subsequently, a discriminant  
274 analysis (DA) was conducted based on the PCA scores. The purpose of this analysis was to compare  
275 the Mahalanobis distance between sources samples and to determine if FDVS of source samples



276 could discriminate the sources. Relationships between FDVS (x variate) and the corresponding weight  
277 contribution of the sediment source data sets (y variate) were analyzed using PLSR. The PLSR models  
278 were carried out based on the component set providing the lowest predictive error (PRESS, option on  
279 XLStat software). Two independent PLSR models were built to estimate the two sediment source  
280 contributions. As the artificial mixtures were measured four times by spectroscopy, 84 FDVS of  
281 artificial mixture samples were generated including 50 values that were randomly selected to build  
282 the models (training set (ST)) and 34 to validate the models (validation set (SV)). The SV:ST ratio used  
283 was approximately 1:2, which is in agreement with recommendations provided in the literature  
284 (Daszykowski et al., 2002). To evaluate the performance of PLSR models, several indicators such as  
285 coefficient of linear regression ( $r^2$ ), root mean square error of calibration (RMSEC) and root mean  
286 square error of prediction (RMSEP) values were calculated. Unlike the conventional fingerprinting  
287 approach, the estimated contributions of sources were not limited to be in the range of 0 % and 100  
288 %. In a similar way, the sum of source contributions was not constrained to be equal to 100 %. As a  
289 result, another way to control the reliability of predictions was to sum the prediction proportions of  
290 both models (Legout et al., 2013). FDVS of river sediment samples were then introduced into these  
291 PLSR models to estimate the contribution of sediment sources.

292 Results

### 293 **1.7.Source description**

294 The ranges of values of all colour parameters measured in the Thio River sediment samples  
295 systematically plotted within the range of values observed in the two potential sources (i.e. mining  
296 and non-mining tributaries; Figure 2 and Table 2). The range test results confirmed the conservative  
297 character of these parameters. For geochemical properties, elemental concentrations measured in  
298 the river sediment also plotted within the range of concentrations found in sources (Sellier et al.,  
299 2019). According to the range test results, all properties were determined to be conservative.

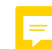

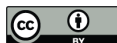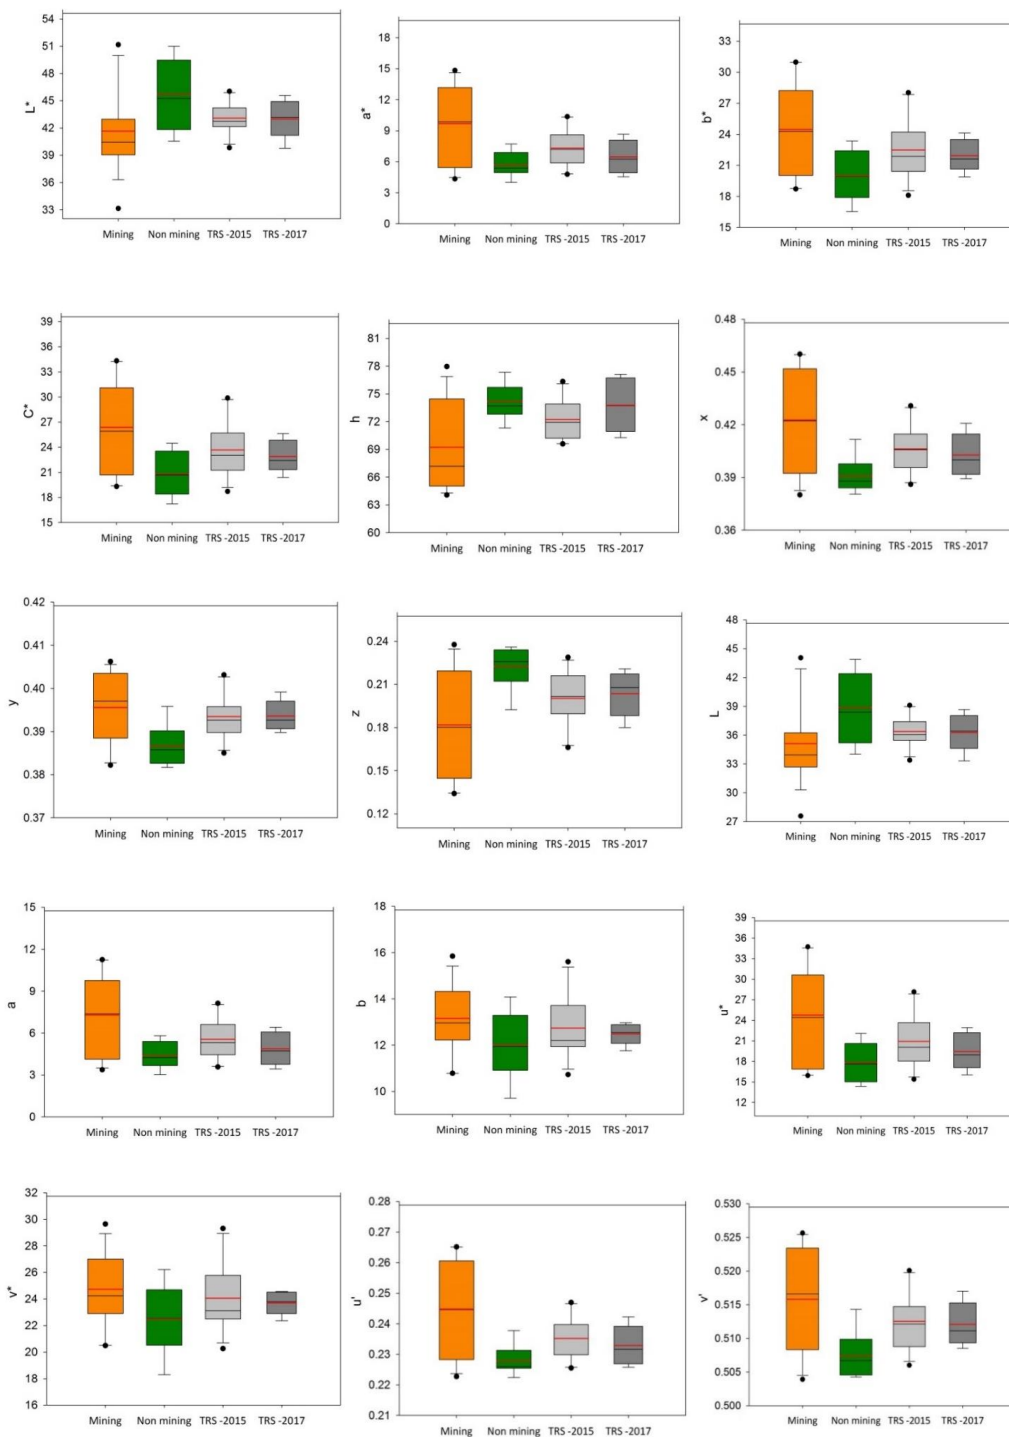

300 **Figure 2** Box-plots of colour parameter values in the <63  $\mu\text{m}$  fraction of sediment collected on the mining  
 301 tributaries (Mining), non-mining tributaries (Non-mining) and the main Thio River (Thio River sediment (TRS)-  
 302 flood events of 2015 and 2017). The box indicates the location of the first and third quartiles; the black line  
 303 indicates the median value; the red line indicates the mean value





304 **Table 2** Geochemical element content and colour parameter values in the <63 µm fraction of sediment sources  
 305 and Thio River sediment; results of Mann-Whitney U test and individual DA used to identify the potential  
 306 tracers to differentiate sources supplying sediment to the Thio River

| Fingerprinting property    | Mann-Whitney U test |          | DA- correctly classified samples (%) | Mining tributaries (n= 16) | Non-mining tributaries (n= 8) | Thio River sediment 2015 (n= 11) | Thio River sediment 2017 (n= 8) |
|----------------------------|---------------------|----------|--------------------------------------|----------------------------|-------------------------------|----------------------------------|---------------------------------|
|                            | U-value             | p-value  |                                      |                            |                               |                                  |                                 |
| <i>Geochemical tracers</i> |                     |          |                                      |                            |                               |                                  |                                 |
| Al ( $g\ kg^{-1}$ )        | 8                   | 0.000    | 87.5                                 | 21 ± 21                    | 67 ± 8                        | 43 ± 15                          | 29 ± 6                          |
| Ca ( $mg\ kg^{-1}$ )       | 21                  | 0.007    | 62.5                                 | 3731 ± 470                 | 286 ± 5194                    | 5281 ± 1201                      | 3945 ± 666                      |
| Cr ( $mg\ kg^{-1}$ )       | 124                 | < 0.0001 | 83.3                                 | 7480 ± 4606                | 706 ± 967                     | 4359 ± 2185                      | 5715 ± 1786                     |
| Fe ( $g\ kg^{-1}$ )        | 121                 | 0.000    | 91.6                                 | 144 ± 70                   | 62 ± 24                       | 43 ± 15                          | 29 ± 6                          |
| K ( $mg\ kg^{-1}$ )        | 2                   | < 0.0001 | 95.8                                 | 1657 ± 2160                | 14019 ± 3702                  | 5944 ± 3294                      | 3750 ± 974                      |
| Mg ( $g\ kg^{-1}$ )        | 119                 | 0.000    | 83.3                                 | 99 ± 59                    | 16 ± 13                       | 88 ± 33                          | 117 ± 21                        |
| Mn ( $mg\ kg^{-1}$ )       | 108                 | 0.006    | 83.3                                 | 2531 ± 1317                | 1439 ± 606                    | 2068 ± 667                       | 1786 ± 516                      |
| Ni ( $mg\ kg^{-1}$ )       | 125                 | < 0.0001 | 91.6                                 | 6576 ± 5075                | 358 ± 339                     | 4218 ± 1938                      | 4341 ± 1239                     |
| Si ( $g\ kg^{-1}$ )        | 6                   | < 0.0001 | 91.6                                 | 178 ± 42                   | 254 ± 28                      | 221 ± 15                         | 204 ± 7                         |
| Ti ( $mg\ kg^{-1}$ )       | 13                  | 0.001    | 87.5                                 | 1409 ± 2077                | 5446 ± 835                    | 2771 ± 1197                      | 1663 ± 457                      |
| Zn ( $mg\ kg^{-1}$ )       | 68                  | 0.834    | -                                    | 146 ± 47                   | 125 ± 4                       | 134 ± 17                         | 125 ± 8                         |
| <i>Colour parameters</i>   |                     |          |                                      |                            |                               |                                  |                                 |
| L*                         | 24                  | 0.013    | -                                    | 41.6 ± 4.6                 | 45.7 ± 3.9                    | 43.1 ± 1.7                       | 43.0 ± 2.0                      |
| a*                         | 104                 | 0.013    | -                                    | 9.7 ± 3.8                  | 5.7 ± 1.2                     | 7.3 ± 1.9                        | 6.5 ± 1.7                       |
| b*                         | 106                 | 0.009    | 70.8                                 | 24.5 ± 4.5                 | 20.0 ± 2.5                    | 22.5 ± 3.0                       | 21.9 ± 1.6                      |
| C*                         | 108                 | 0.006    | 66.6                                 | 26.4 ± 5.5                 | 20.8 ± 2.7                    | 23.7 ± 3.5                       | 22.9 ± 2.0                      |
| h                          | 26                  | 0.019    | -                                    | 69.2 ± 4.8                 | 74.2 ± 1.9                    | 72.2 ± 2.2                       | 73.8 ± 2.9                      |
| x                          | 107                 | 0.007    | 75                                   | 0.42 ± 0.03                | 0.39 ± 0.01                   | 0.41 ± 0.01                      | 0.40 ± 0.01                     |
| y                          | 111                 | 0.003    | 79.2                                 | 0.396 ± 0.008              | 0.387 ± 0.005                 | 0.393 ± 0.005                    | 0.394 ± 0.004                   |
| z                          | 19                  | 0.005    | 75                                   | 0.18 ± 0.04                | 0.22 ± 0.01                   | 0.20 ± 0.02                      | 0.20 ± 0.02                     |
| L                          | 27                  | 0.013    | -                                    | 35.1 ± 4.2                 | 38.9 ± 3.7                    | 36.4 ± 1.6                       | 36.3 ± 1.9                      |
| a                          | 103                 | 0.016    | -                                    | 7.3 ± 2.9                  | 4.4 ± 1.0                     | 5.6 ± 1.5                        | 4.9 ± 1.2                       |
| b                          | 91                  | 0.106    | -                                    | 13.1 ± 1.5                 | 12.0 ± 1.5                    | 12.7 ± 1.4                       | 12.5 ± 0.4                      |
| u*                         | 101                 | 0.023    | -                                    | 24.8 ± 6.9                 | 17.8 ± 2.8                    | 20.9 ± 4.0                       | 19.4 ± 2.7                      |
| v*                         | 93                  | 0.081    | -                                    | 24.7 ± 2.8                 | 22.5 ± 2.7                    | 24.1 ± 2.6                       | 23.7 ± 0.8                      |
| u'                         | 105                 | 0.011    | -                                    | 0.245 ± 0.016              | 0.228 ± 0.005                 | 0.235 ± 0.007                    | 0.233 ± 0.007                   |
| v'                         | 111                 | 0.003    | 79.2                                 | 0.516 ± 0.008              | 0.507 ± 0.004                 | 0.513 ± 0.004                    | 0.512 ± 0.003                   |

307



308 **1.8.Selection of parameters/properties for modelling**

309 1.8.1. 'Colour' model

310 According to the Mann-Whitney U test results, six colour parameters (*i.e.*  $b^*$ ,  $C^*$ ,  $x$ ,  $y$ ,  $z$ ,  $v'$ )  
311 provided significant discrimination between the two sediment sources (*i.e.*  $p$ -value < 0.01, Table 2).  
312 The backward DFA selected only  $v'$  as the optimal tracer of mining and non-mining source sediments  
313 (Figure 2, Table 3). Although this parameter correctly classified 79.2 % of sources, the high Wilk's  
314 lambda value obtained (*i.e.* 0.7209, Table 3) induced that only 27.9 % of variance was explained by  $v'$ .  
315 The low Mahalanobis distance value obtained (*i.e.* 1.6) confirmed that sediment sources were not  
316 well separated. Accordingly, and owing to the high error percentage of the source discrimination  
317 provided by this approach (*i.e.* 72.1 %), source contributions were not modeled with the 'colour'  
318 model.

319 1.8.2. 'Geochemistry' model

320 When considering the two potential sediment sources, all geochemical properties (except Zn)  
321 were selected as potentially discriminant by the Mann-Whitney U test (*i.e.*  $p$ -value < 0.01, Table 2).  
322 Among the 10 potential tracers, K was selected by the backward DFA to model sediment source  
323 contributions from mining and non-mining tributaries with 95.3 % of sources correctly classified and  
324 83.1 % of variance explained by K. This percentage of variance explained was deduced from the final  
325 Wilk's lambda value obtained (*i.e.* 0.1691). Moreover, the Mahalanobis distance value showed that  
326 the sediment sources were well separated from each other with a significant distance of 20.3 (Table  
327 3) (Sellier et al., 2019).

328 1.8.3. 'Colour + geochemistry' model

329 When combining colour parameters and geochemical properties, the DFA selected five optimal  
330 tracers (*i.e.* K, Ca, Ti,  $b^*$ ,  $C^*$ ) able to correctly classify 100 % of the sources. A significant improvement  
331 in the source discrimination was observed with the lowest Wilk's lambda value obtained (*i.e.* 0.0734)  
332 and the highest percentage of variance explained (*i.e.* 92.6 %). Moreover, the Mahalanobis distance

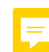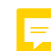



333 value obtained (i.e. 52.1) was more than 2.5 times higher than that estimated with the  
334 'geochemistry' model (Table 3), thus resulting in a better separation between sediment sources than  
335 the previous approach (i.e. 'geochemistry')

336 **Table 3** Results of DFA used to identify the optimum tracer combination to differentiate sources supplying  
337 sediment to the Thio River

| Fingerprint property selected | Wilks' Lambda | Variance explained by the variables (%) | Squared Mahalanobis distance | Correctly classified samples (%) |
|-------------------------------|---------------|-----------------------------------------|------------------------------|----------------------------------|
| <hr/>                         |               |                                         |                              |                                  |
| 'Colour'                      |               |                                         |                              |                                  |
| v'                            | 0.7209        | 27.9                                    | 1.6                          | 79.2                             |
| <hr/>                         |               |                                         |                              |                                  |
| 'Geochemistry'                |               |                                         |                              |                                  |
| K                             | 0.1691        | 83.1                                    | 20.3                         | 95.3                             |
| <hr/>                         |               |                                         |                              |                                  |
| 'Colour + Geochemistry'       |               |                                         |                              |                                  |
| K, Ca, Ti, b*, C*             | 0.0734        | 92.6                                    | 52.1                         | 100                              |

338

### 339 1.9. Assessment of model performance on artificial mixture samples

340 Prior to applying mixing models to river sediments, preliminary tests were conducted to  
341 control the validity of the models (i.e. 'geochemistry' and 'colour + geochemistry') and the associated  
342 estimations of source contribution errors. When applying these models on the artificial mixture  
343 samples, actual and predicted proportions were well correlated for both models (i.e.  $r^2 = 0.99$  and  $r^2 =$   
344  $0.98$  respectively for 'geochemistry' and 'colour + geochemistry' models) (Figure 3).

345 However, the 'geochemistry' model described in Figure 3-a showed that the contributions of  
346 mining tributaries were overestimated. With 100 % of actual mining contributions, 100 % of mining  
347 contribution was predicted by the model. However, instead of 0 % of actual mining contributions, a  
348 mining contribution of 15.5% was predicted by the model. It means that the more the estimated  
349 mining source contributions tends towards 0%, the greater the associated overestimation (i.e.  
350 maximum 15.5 %) (Figure 3-a). The 'colour + geochemistry' model also provided a slight



351 overestimation of the contribution of mining tributaries (i.e. 7 % intercept of the regression line,  
352 Figure 3-b). Given the slope of the regression line calculated is close to 1 (i.e. 0.98), this 7%  
353 overestimation remains constant over the entire range of potential contributions.

354 **Figure 3** Comparison between actual mining source proportions prepared in artificial mixtures and the mining

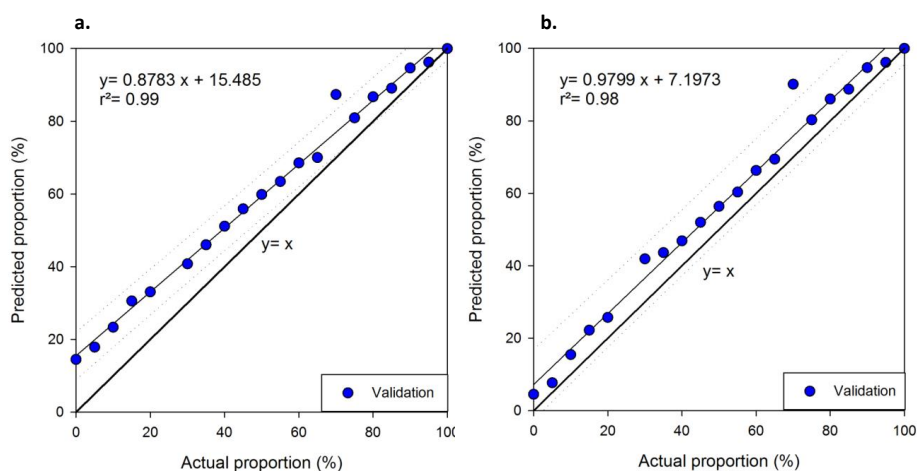

355 source proportions predicted by the 'geochemistry' (a) and 'colour + geochemistry' (b) models

### 356 1.10. Building partial least-squares models based on FDVS

357 Mining sources are characterized by a red-orange color while sediments originating from non-  
358 mining sources are grey. The color contrasts may be explained by the distinct geochemical  
359 composition of these sources. Mean FDVS indicated the presence of goethite (i.e. at 445 and 525  
360 nm), hematite (i.e. at 555, 565 and 575 nm), and organic matter (i.e. between 600-700 nm) (Debret  
361 et al., 2011) in both mining and non-mining sources (Figure 4). In similar way, the Thio River sediment  
362 samples (2015, 2017) showed similar characteristics since the variations of the mean FDVS remained  
363 between those found in the sources (Figure 4). Nevertheless, some differences can be observed  
364 between the sources. The spectral signature of goethite is slightly stronger at 445 nm in non-mining  
365 tributaries compared to mining tributaries. No difference between sources was observed at 525 nm,  
366 the second wavelengths characterizing the presence of goethite. In contrast, the spectral signature of



367 hematite (*i.e.* at 555, 565 and 575 nm) was stronger in mining tributaries than in non-mining  
368 tributaries.

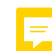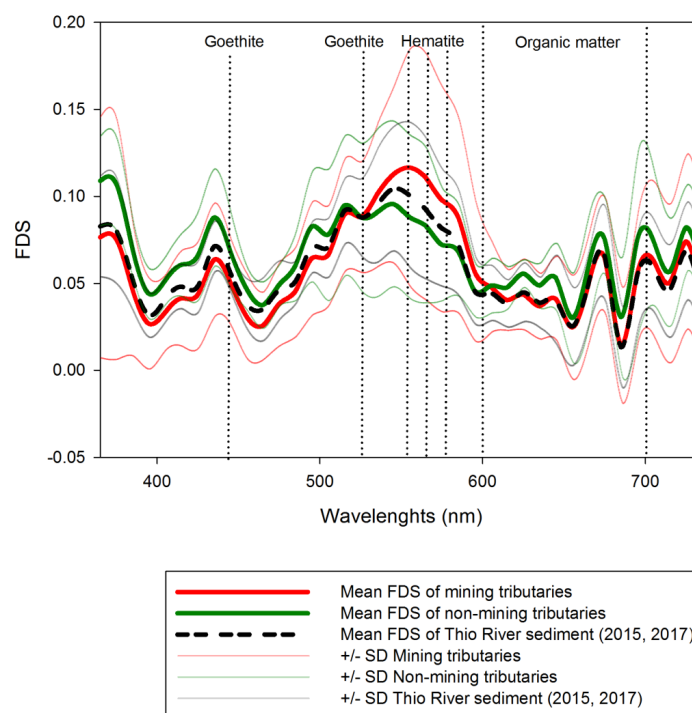

369 **Figure 4** FDVS measured in the <63  $\mu\text{m}$  fraction of sources and Thio River sediment samples

370 To test the potential discrimination offered by FDVS, a PCA was applied on the source data set.  
371 The first ten principal components from PCA explained 99 % of the total variation in the spectra. The  
372 DFA performed on these components resulted in a final Wilks' lambda value of 0.1585. It means that  
373 84.1 % of variance is explained by these ten components. Moreover, 100 % of the source samples  
374 were correctly classified. The performances of FDVS-PLSR models are presented in Figure 5. The  
375 mining and non-mining tributary FDVS-PLSR models provided an excellent correlation between actual  
376 and predicted proportions with  $r^2$  and slopes close to 1 and intercepts of linear regression close to 0.  
377 The root mean square error of calibration (RMSEC) values estimated for both models were low, *i.e.*  
378 3.4 % and 3.1 % respectively for mining and non-mining tributary models. These models also



379 provided a good predictability of source contributions with low root mean square error of prediction  
380 (RMSEP) values (i.e. 8.0 % and 4.7 % respectively for mining and non-mining tributary models).  
381 Another way to control the reliability of predictions was to sum the predicted proportions of both  
382 models (Legout et al., 2013). Considering the whole data set used in the construction of the partial  
383 least-squares regression models (i.e. calibration and validation) led to a mean sum of the predicted  
384 source proportions of 102 % (SD 3 %, range: 98-114 %), thus highlighting the effective prediction  
385 performance of FDVS-PLSR models.

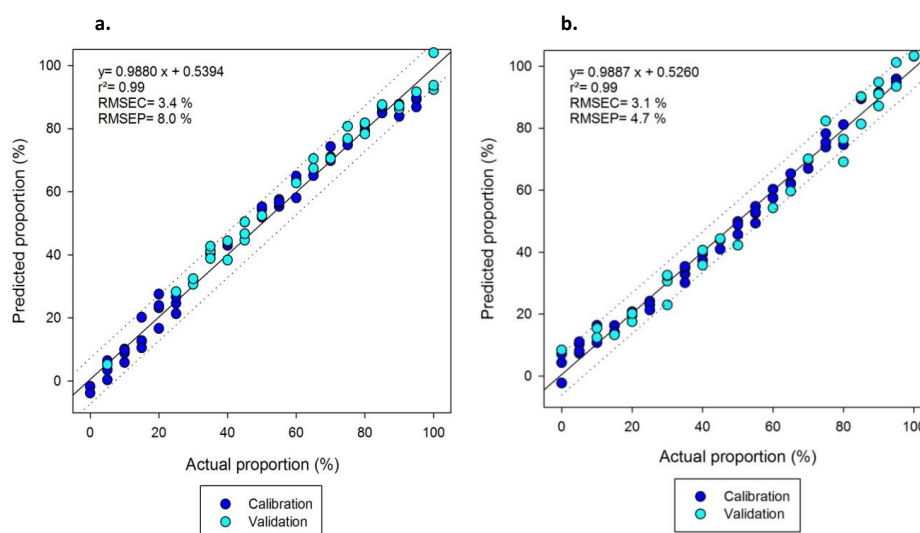

386 **Figure 5** Building of FDSV-PLSR models for mining sources (a) and non-mining sources (b)

### 387 1.11. Source apportionment modelling

#### 388 1.11.1. 'Geochemistry' model

389 The 'geochemistry' model estimated that the mining tributaries contributed an average of 65  
390 % (SD 27 %) of the Thio River sediment during the 2015 flood event; they therefore dominated  
391 sediment inputs overall during this event. Nevertheless, non-mining tributaries locally and mainly  
392 contributed to the sediment inputs at three sampling points along the Thio River (Figure 6-a, Table 4,  
393 sampling points [3, 5, 7]). These contributions did not, however, compensate those provided by

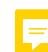

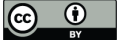

394 mining tributaries in the estuary (63-89 %). Indeed, the dominant mining contributions found in  
395 upstream river reaches (96 %, Figure 6-a, Table 4, sampling point [1]) gradually decreased along the  
396 Thio River, fluctuating between 17-77 % before increasing again at the confluence between the Thio  
397 River and the mining tributaries draining the Thio Plateau mining area (i.e. 85 %, Figure 6-a, Table 4,  
398 sampling point [8]) and reaching 60-64 %.

399

400 This model also demonstrated that mining tributaries dominated sediment inputs with a mean  
401 contribution of 83 % (SD 8%) during the 2017 flood event (Table 5). The lowest mining tributary  
402 contributions estimated (i.e. 69 %) was found after the confluence with the Kouaré non-mining  
403 tributary (Figure 6-b, Table 5, sampling point [4]). Nevertheless, further downstream, the proportions  
404 of the mining sources increased again to reach 77-83 % in the estuary (Figure 6-b, Table 5, sampling  
405 points [7, 8]).

406

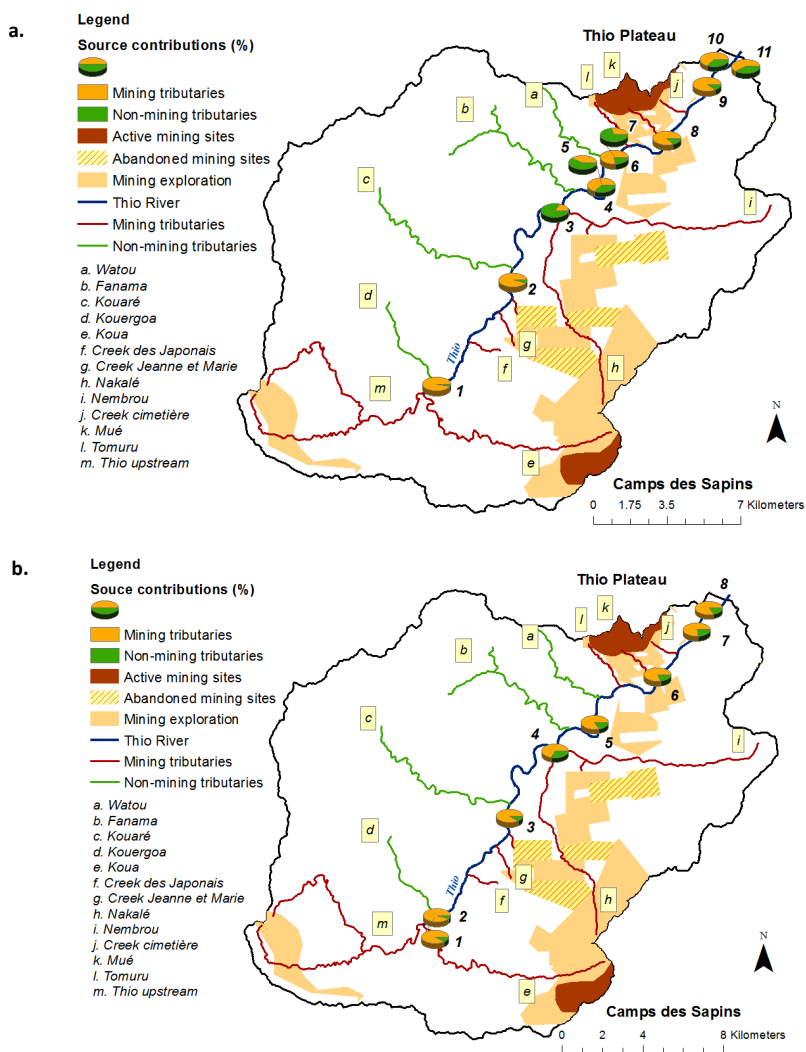

407 **Figure 6** Relative contributions of mining and non-mining tributaries to the sediment collected in the Thio River  
 408 during the 2015 (a) and 2017 (b) flood events using the 'geochemistry' model

409





410 1.11.2. 'Colour + geochemistry' model

411 Similar results were obtained with the 'colour + geochemistry' model. The contributions of  
412 mining tributaries were estimated to an average of 68 % (SD 25 %) for the 2015 flood event. Mining  
413 tributary contributions provided almost all the sediment transiting the uppermost reach of the Thio  
414 River (i.e. 99 %, Figure 7-a, Table 4, sampling point [1]). However, after the confluence with the  
415 **Kouaré tributary**, non-mining tributaries dominated with a contribution of 83 % (Figure 7-a, Table 4,  
416 sampling point [3]). Further downstream, the contribution of mining tributaries increased again with  
417 supplies varying between 34- 89 % to reach 58- 70 % in the estuary (Figure 7-a, Table 4). The largest  
418 difference between 'geochemistry' and 'colour + geochemistry' model outputs was 18 % for the 2015  
419 flood event.

420 The 'colour + geochemistry' model also demonstrated that 88 % (SD 8 %) of the sediment  
421 supply originated from mining tributaries during the 2017 flood event. Along the Thio River, mining  
422 tributary contributions varied between 100 % in the uppermost reach, 74% after the Kouaré river  
423 confluence and 83-85% in the estuary (Figure 7-b, Table 5). The largest difference between  
424 'geochemistry' and 'colour + geochemistry' model outputs was 10 % for the 2017 flood event (Table  
425 5).

426

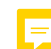

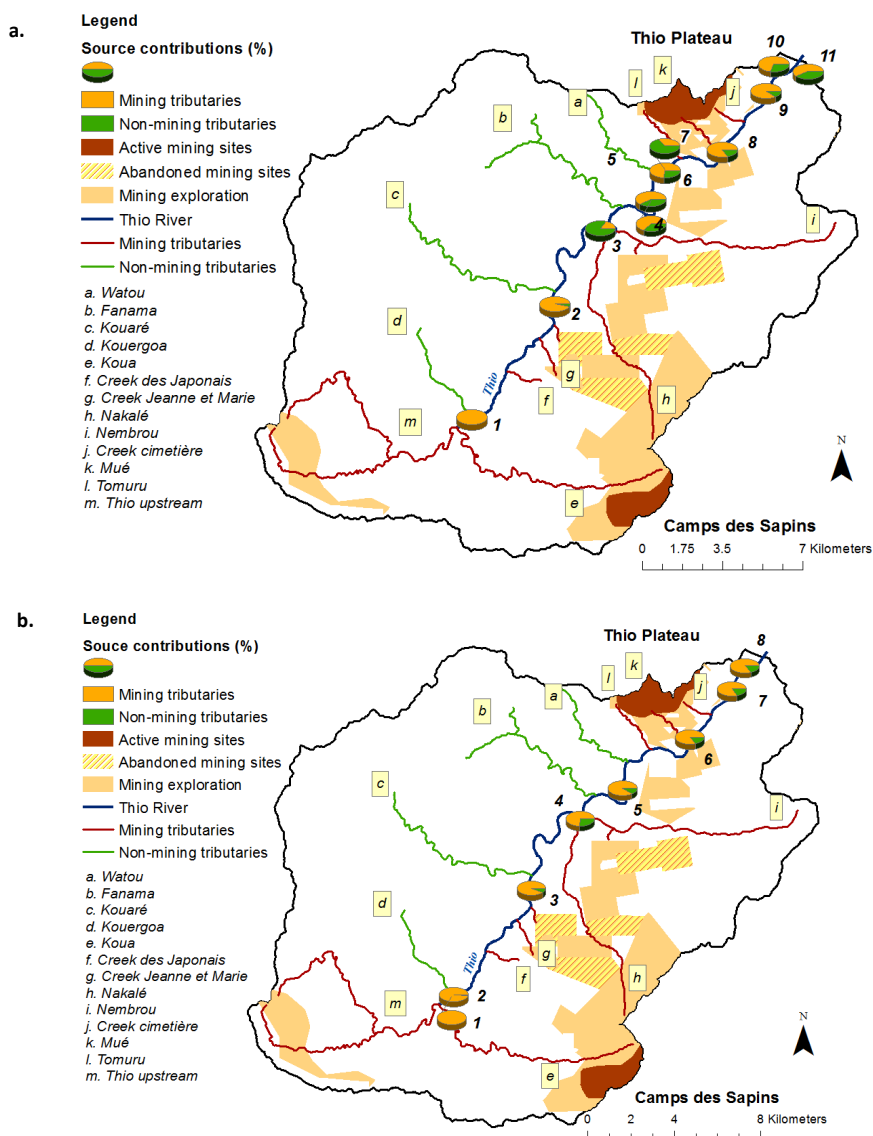

427 **Figure 7** Relative contributions of mining and non-mining tributaries to the sediment collected in the Thio River  
 428 during the 2015 (a) and 2017 (b) flood events using the 'colour + geochemistry' model



429 1.11.3.FDVS-PLSR model

430 When applying the FDVS-PLSR models (i.e. mining and non-mining tributary contributions) to  
431 the river sediment samples (2015, 2017), the mean sums of the source contributions were 92 % (SD 8  
432 %) and 80 % (SD 13 %), respectively, for the 2015 and 2017 flood events (Tables 4 and 5). Owing that  
433 predicted sums were different from the expected 100%, a bar plot display of the source contributions  
434 has been chosen to facilitate the interpretation of the results (Figure 8).

435 According to the FDVS-PLSR model results, 34 % (SD 22 %) of sediment supply originated from  
436 mining tributaries while non-mining tributary contribution provided 58 % (SD 18 %) of the sediment  
437 input for the 2015 flood event (Figure 8-a, Table 4). In the upper part of the Thio River catchment,  
438 non-mining tributaries largely dominated with a contribution of 80 % versus 6 % for mining  
439 tributaries. Along the Thio River, mining tributary contributions gradually increased to reach 70 %  
440 after the Mué tributary confluence (i.e. one of tributaries draining the Thio Plateau Mine, Figure 8-a,  
441 Table 4, sampling point [9]). The non-mining tributary contributions fluctuated along the Thio River  
442 between 41-85 % (Figure 8-a, Table 4, sampling points [2-8]) and reached a minimum (i.e. 28 %,  
443 Figure 8-a, Table 4, sampling point [9]) after the Mué tributary confluence. In the estuary, sediment  
444 supply was originated from 51-70 % of mining tributaries and 28- 52 % of non-mining tributaries  
445 (Figure 8-a, Table 4, sampling points [9, 10, 11]).

446 The FDVS-PLSR models also indicated that mining and non-mining tributaries respectively  
447 contributed a mean of 29 % (SD 20 %) and 51 % (SD 11 %) of sediment (Figure 8-b, Table 5) during  
448 the 2017 flood event. In a similar way, mining contributions gradually increased along the Thio River  
449 from 11 % in upper parts to reach 52-58 % in the estuary. On the contrary, non-mining contributions  
450 gradually decreased from 56 % in uppermost parts to reach 35-36 % in the estuary (Figure 8-b, Table  
451 5).

452 In summary, the FDVS-PLSR models provided opposite results to those of the conventional  
453 sediment fingerprinting approach (i.e. 'geochemistry' and 'colour + geochemistry' models). According



454 to the FDVS-PLSR models, non-mining tributaries contributed the majority of the sediment supply for  
455 the 2015 (58 %, SD 18 %) and 2017 (51 %, SD 11 %) flood events. On the contrary, the 'geochemistry'  
456 and 'colour + geochemistry' models demonstrated that mining tributary contributions dominated  
457 sediment supply for the 2015 (i.e. respectively 65 % (SD 27%) and 68 % (SD 28 %)) and 2017 flood  
458 events (i.e. respectively 83% (SD 8%) and 88 % (SD 8%)).

459

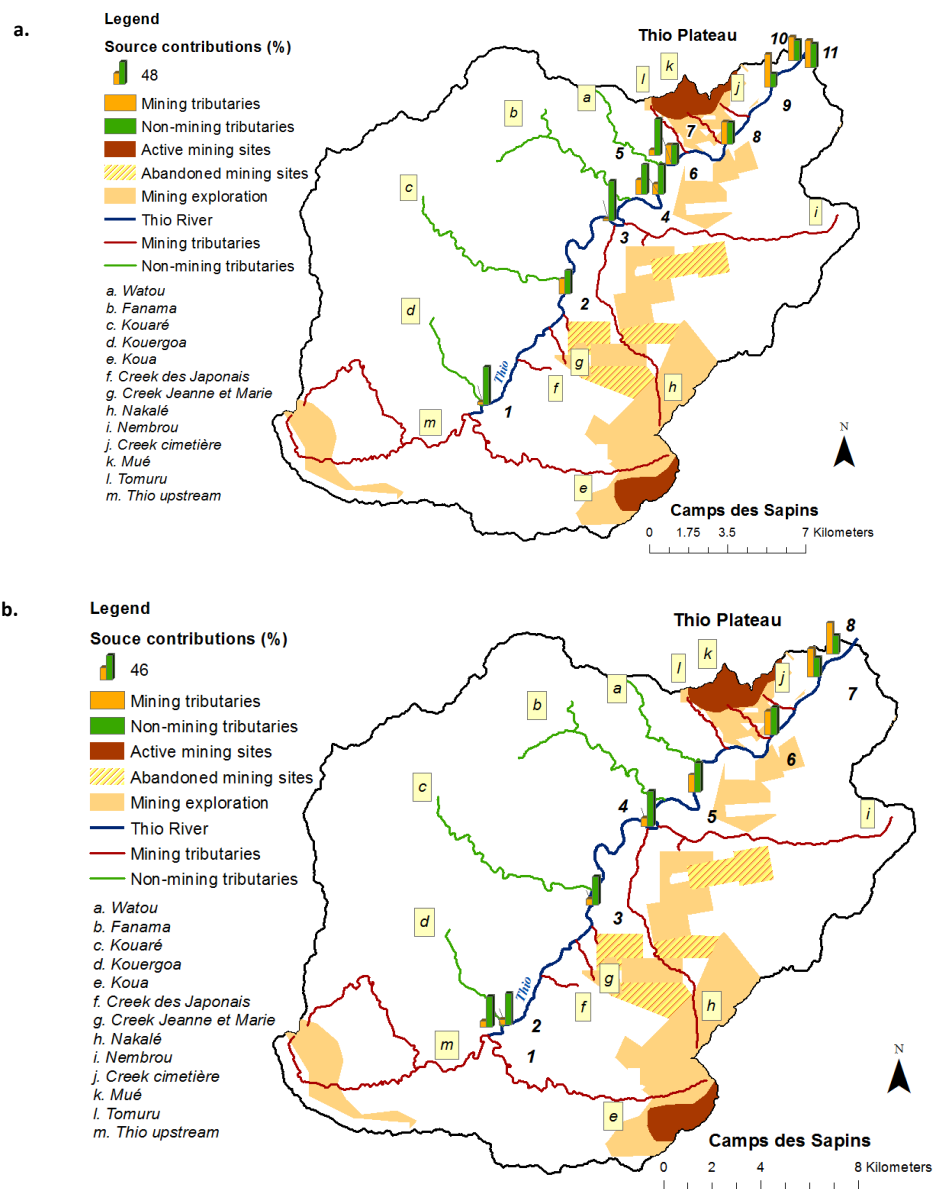

460 **Figure 8** Relative contributions of mining and non-mining tributaries to the sediment collected in the Thio River  
 461 during the 2015 (a) and 2017 (b) flood events using the FDVS-PLSR models



462 **Table 4** Source contributions calculated by FDVS-PLSR, 'geochemistry', 'colour + geochemistry' approaches for sediment deposited during the flood of February 25,2015

| Sampling point | Mining tributary contributions (%) |              |                       | Non-mining tributary contributions (%) |              |                       | Sum of source contributions (%) |              |                       |
|----------------|------------------------------------|--------------|-----------------------|----------------------------------------|--------------|-----------------------|---------------------------------|--------------|-----------------------|
|                | FDS- PLSR                          | Geochemistry | Colour + Geochemistry | FDS- PLSR                              | Geochemistry | Colour + geochemistry | FDS- PLSR                       | Geochemistry | Colour + geochemistry |
|                | 1                                  | 6            | 96                    | 99                                     | 80           | 4                     | 1                               | 86           | 100                   |
| 2              | 33                                 | 95           | 96                    | 51                                     | 5            | 4                     | 84                              | 100          | 100                   |
| 3              | 4                                  | 17           | 17                    | 85                                     | 83           | 83                    | 90                              | 100          | 100                   |
| 4              | 32                                 | 65           | 65                    | 64                                     | 35           | 35                    | 96                              | 100          | 100                   |
| 5              | 22                                 | 41           | 59                    | 63                                     | 59           | 41                    | 85                              | 100          | 100                   |
| 6              | 42                                 | 77           | 74                    | 41                                     | 23           | 26                    | 83                              | 100          | 100                   |
| 7              | 12                                 | 29           | 34                    | 79                                     | 71           | 66                    | 91                              | 100          | 100                   |
| 8              | 47                                 | 85           | 83                    | 46                                     | 15           | 17                    | 93                              | 100          | 100                   |
| 9              | 70                                 | 88           | 89                    | 28                                     | 12           | 11                    | 98                              | 100          | 100                   |
| 10             | 51                                 | 64           | 70                    | 44                                     | 36           | 30                    | 94                              | 100          | 100                   |
| 11             | 59                                 | 60           | 58                    | 52                                     | 40           | 42                    | 111                             | 100          | 100                   |
| M (%)          | 34                                 | 65           | 68                    | 58                                     | 35           | 32                    | 92                              | 100          | 100                   |
| SD (%)         | 22                                 | 27           | 25                    | 18                                     | 27           | 25                    | 8                               | -            | -                     |
| Minimum (%)    | 4                                  | 17           | 17                    | 28                                     | 4            | 1                     | 84                              | -            | -                     |
| Maximum (%)    | 70                                 | 96           | 99                    | 85                                     | 83           | 83                    | 111                             | -            | -                     |

|



464 **Table 5** Source contributions calculated by FDVS-PLSR, 'geochemistry', 'colour + geochemistry' approaches for sediment deposited during the flood of April 10,2017

| Sampling point | Mining tributary contributions (%) |              |                       | Non-mining tributary contributions (%) |              |                       | Sum of source contributions (%) |              |                       |
|----------------|------------------------------------|--------------|-----------------------|----------------------------------------|--------------|-----------------------|---------------------------------|--------------|-----------------------|
|                | FDS- PLSR                          | Geochemistry | Colour + Geochemistry | FDS- PLSR                              | Geochemistry | Colour + geochemistry | FDS- PLSR                       | Geochemistry | Colour + geochemistry |
| 1              | 11                                 | 90           | 100                   | 56                                     | 10           | 0                     | 66                              | 100          | 100                   |
| 2              | 9                                  | 94           | 98                    | 58                                     | 6            | 2                     | 68                              | 100          | 100                   |
| 3              | 11                                 | 89           | 92                    | 52                                     | 11           | 8                     | 63                              | 100          | 100                   |
| 4              | 16                                 | 69           | 74                    | 66                                     | 31           | 26                    | 82                              | 100          | 100                   |
| 5              | 32                                 | 82           | 89                    | 54                                     | 18           | 11                    | 86                              | 100          | 100                   |
| 6              | 44                                 | 81           | 84                    | 51                                     | 19           | 16                    | 95                              | 100          | 100                   |
| 7              | 52                                 | 77           | 83                    | 36                                     | 23           | 17                    | 88                              | 100          | 100                   |
| 8              | 58                                 | 83           | 85                    | 35                                     | 17           | 15                    | 92                              | 100          | 100                   |
| M (%)          | 29                                 | 83           | 88                    | 51                                     | 17           | 12                    | 80                              | 100          | 100                   |
| SD (%)         | 20                                 | 8            | 8                     | 11                                     | 8            | 8                     | 13                              | -            | -                     |
| Minimum (%)    | 9                                  | 69           | 74                    | 35                                     | 6            | 0                     | 63                              | -            | -                     |
| Maximum (%)    | 58                                 | 94           | 100                   | 66                                     | 31           | 26                    | 95                              | -            | -                     |

|



466 **1.6.Complementary tests: representativeness of artificial mixture samples used for the**  
467 **FDVS-PLSR models compared to source samples**

468 Given the opposite results obtained in terms of source contributions between FDVS-PLSR  
469 models on the one hand and 'geochemistry' and 'colour + geochemistry' models on the other hand,  
470 complementary analyses were carried out on individual source samples (i.e. not the composite  
471 samples used to create the artificial mixtures) to estimate their composition in terms of source  
472 contributions with FDVS-PLSR models. As done in Legout et al. (2013) to assess uncertainties in the  
473 fingerprinting approach due to source heterogeneity, they were considered as river sediment  
474 samples. A mean sum of the predicted source proportions of 94 % (SD 17 %, range: 49-131 %) was  
475 calculated from the source sample data set. The compositions of mining and non-mining tributary  
476 samples in Figures 9 and 10 show that artificial mixture samples built from a mix between the  
477 composite mining source sample and the composite non-mining source sample did not cover entirely  
478 the range of values found in all the sources samples, which may explain why some source samples  
479 showed mining and non-mining tributary composition lower than 0 and/or higher than 100 %.

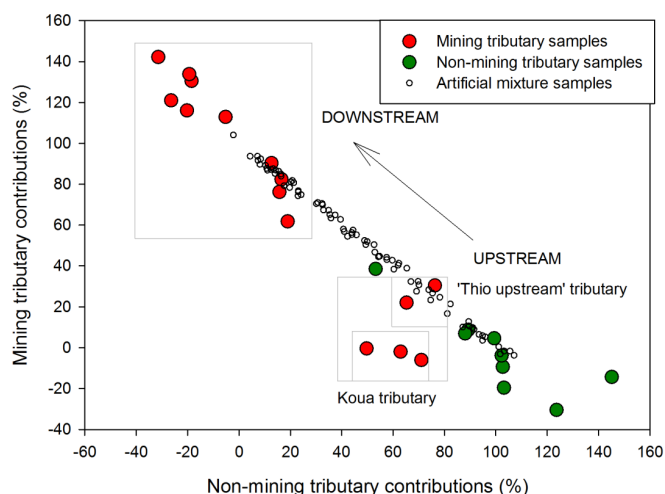

480

481 **Figure 9** Relative compositions of mining and non-mining sources estimated by the FDVS-PLSR models  
482 applied to the individual source sediment samples





483 Moreover, two sub-groups of mining tributary samples can be distinguished, the first one  
484 corresponding to samples collected on the mining tributaries located in the uppermost part of the  
485 catchment and the second to samples collected on the mining tributaries located further  
486 downstream. The FDVS-PLSR differentiated rather well the second group since the mining tributary  
487 composition is dominant in these samples. On the contrary, the first group referred to as 'Upstream'  
488 merged with the non-mining tributary samples (Figure 9). Indeed, Figure 10 shows the mining  
489 tributaries located in the upper part of the catchment were defined as 'non-mining tributaries' by the  
490 FDVS-PLSR model.

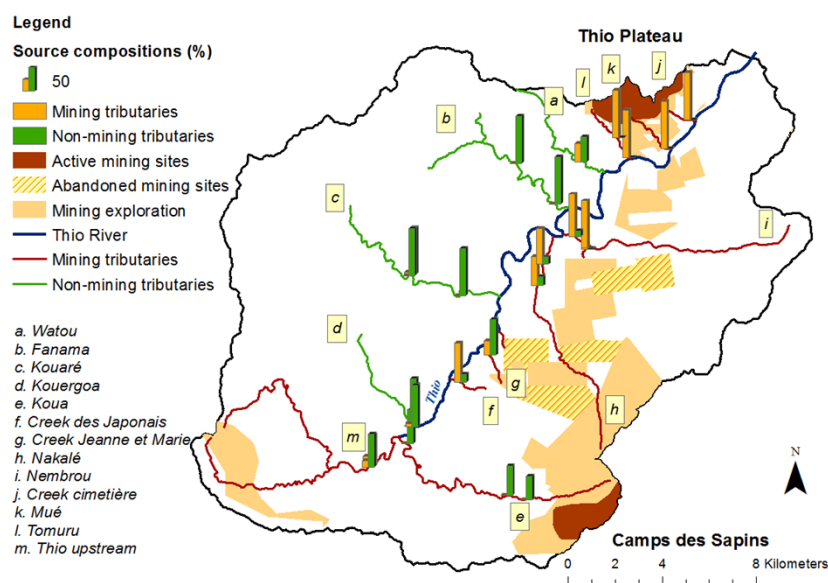

491 **Figure 10** Relative compositions of mining and non-mining sources estimated by the FDVS-PLSR models applied  
492 to the individual sediment sources in the Thio River catchment

493 The low K contents found in these samples confirmed, however, that they were mainly  
494 supplied by mining sources (Figure 11). Nevertheless, a colour difference could be observed visually  
495 and through variations of the  $a^*$  parameter: the  $a^*$  values increased from upper parts to lower,  
496 which results in an increasingly red coloration of mining tributary samples in downstream direction.  
497 Figure 11 shows also that the  $a^*$  values found in samples collected in the upper catchment part



498 overlapped with those of non-mining tributary samples. Among the 'upstream' mining tributary  
499 samples, only three samples collected on the Koua tributary (i.e. draining Camps des Sapins mine)  
500 showed values that were not comprised in the ranges covered by the artificial mixture samples  
501 (Figure 9).

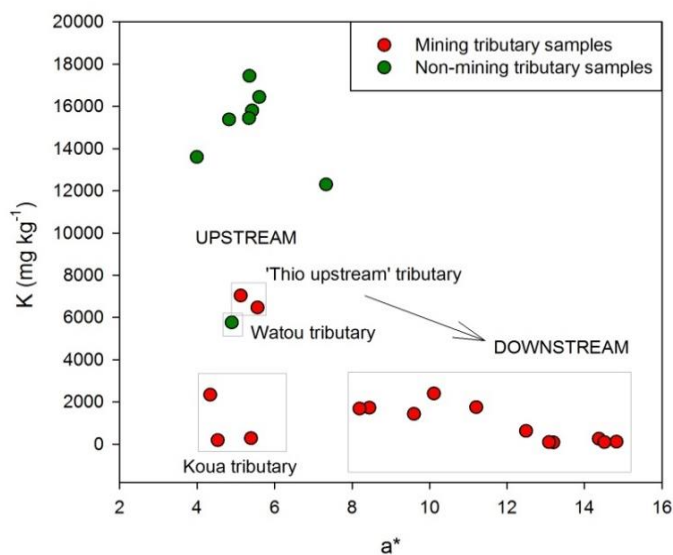

502 **Figure 11** Diagram of K contents as a function of a\* parameter values within sediment sources and artificial  
503 mixture samples

504 Discussion

### 505 1.7. Advantages and limits of models

#### 506 1.7.1. 'Colour' model

507 One of the objectives of this study was to test the contribution of spectrophotometry for  
508 improving the source discrimination. Indeed, visual observations indicated that mining tributary  
509 samples were red-orange whereas non-mining tributary samples were rather grey. However, the  
510 results showed that the colour parameters, when used individually, did not provide sufficient  
511 discrimination between sources (Table 2) to meet this objective. Indeed, some mining tributary  
512 samples showed colour parameter values similar to those found in non-mining tributary samples



513 (e.g. v' at Table 3, or a\* shown at Figure 11). This overlap of value ranges could explain in particular  
514 the inability of the 'colour' model to provide satisfactory source discrimination. Nevertheless, results  
515 obtained with colour parameter analyses coupled to visual observations highlighted the occurrence  
516 of two groups of mining tributary samples (i.e. 'Upstream' and 'Downstream'). The coloration  
517 differences (i.e. orange/ 'Upstream' and 'red/Downstream') observed between these two groups  
518 could be due to the the fact that on the one hand, the reddish colour does not provide a highly  
519 conservative signature as it may be altered by the oxydo-reduction of iron minerals during the  
520 periods of submersion of sediments under water. On the other hand, the presence of different types  
521 of nickel ores could explain these coloration differences. Indeed, nickel ore formation depends partly  
522 on the morphological context, for instance on whether nickel ores are located in a basin, on a plateau  
523 or a slope. This morphological context influences the weathering level of peridotites (i.e. laterite  
524 profile: red laterites at the top >> yellow laterites >> saprolites >> peridotites at the bottom). In the  
525 Thio River catchment, nickel ores from the Thio Plateau mine are 'plateau nickel ores' whereas those  
526 from the Camps des Sapins mine are 'slope nickel ores' (Mardhel et al., 2018). No information is  
527 provided in the literature on the types of nickel ores that were mined in abandoned mining sites. The  
528 red coloration of the 'Downstream' mining tributary samples could then be associated with more  
529 altered laterite profiles with a thicker layer of red laterites compared to the 'Upstream' mining  
530 tributary samples, which could be associated with a laterite profile with a thinner layer of red  
531 laterites.

#### 532 1.7.2. 'Geochemistry' model

533 The 'geochemistry' model based on K provided significant discrimination between sources  
534 (Table 2), regardless of the types of nickel ores that may be found in the Thio River catchment. K is a  
535 lithological tracer discriminating sediments originating from the erosion of the two dominant  
536 lithologies (i.e. peridotite massifs vs. volcano-sedimentary formations) in the Thio River catchment.  
537 As anthropogenic erosion (i.e. due to mining activities) dominates on the peridotite massifs (Garcin

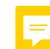



538 et al., 2017), K therefore provides an optimal discrimination between mining and non-mining  
539 tributary contributions.

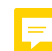

540 This parameter classified the source samples rather well (i.e. 95.3 % of correct classification,  
541 Table 3). Indeed, the 16 mining source samples were all correctly classified (100%) and only one non-  
542 mining source sample was not correctly classified (87.5 %); it corresponds to the Watou tributary  
543 sample (Figure 11). This sample showed a K content similar to that found in mining tributary samples.  
544 The Watou tributary is particular because it drains both volcano-sedimentary formations and  
545 peridotite massifs that were not exploited for mining, which justifies that it was considered as a non-  
546 mining tributary. The K content measured in this sample could be representative of that found in  
547 sediment sources characterized by a mix between the two dominant lithologies. Again, when  
548 observing Figure 11, two mining tributary samples (i.e. 'Thio upstream') showed similar K contents to  
549 that found in the Watou tributary sample. The 'Thio upstream' tributary also drains both areas  
550 associated with volcano-sedimentary formations and exploited peridotite massifs (i.e. mining  
551 prospection), which justifies that it was considered as a mining tributary.

552 The analysis of colour parameters coupled with that of geochemical elements indicated that  
553 these samples collected on the 'Thio upstream' tributary showed a less red coloration not because  
554 they are associated with a different type of ore, as could be the case for the samples collected on  
555 Koua tributary draining Camps des Sapins mine (Figure 11), but because they are characterized by a  
556 mix of both lithologies. As a result, the 'geochemistry' model showed a certain limitation to classify  
557 source samples characterized by a mix of both lithologies. The performance of the 'geochemistry'  
558 model described in Table 2 remains, however, excellent. The application of this model on artificial  
559 mixture samples provided very satisfactory results (Figure 3-a) with a good correlation between the  
560 predicted and the actual source proportions ( $r^2= 0.99$ ). An overestimation of mining tributary  
561 contributions is, however, to be taken into account. It was evaluated to a maximum at 15.5 %. This

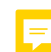



562 overestimation is greater when the mining contributions estimated by the model tend towards 0 %  
563 (maximum: 15.5 %, Figure 3-a).

#### 564 1.7.3. 'Colour + geochemistry' model

565 The 'colour + geochemistry' (i.e. K, Ca, Ti,  $\delta^{15}N$ , C\*) model provided the best discrimination  
566 between sources (Table 3). The inclusion of colour parameters in the 'colour + geochemistry'  
567 approach allowed for the discrimination of source samples (i.e. 100 % of correctly classified source  
568 samples) that a 'geochemistry' approach alone could not achieve. Results of the tests carried out on  
569 the artificial mixture samples also showed an excellent correlation between the predicted and the  
570 actual source proportions (i.e.  $r^2=0.98$ ). A slight overestimation of the mining tributary contributions  
571 (7 %) was observed with this approach, which remains rather reasonable (Figure 3-b). In this model, K  
572 is the lithological tracer which has the higher discriminant powerful (Table 2), which may explain the  
573 similarity of results obtained with the 'colour + geochemistry' and the 'geochemistry' models.  
574 Indeed, mining tributaries contributed an average of 65 % (SD 27 %) for 'colour + geochemistry'  
575 model and 68 % (SD 25 %) for 'geochemistry' model (Table 4). For the 2017 flood event, mining  
576 source contributions largely dominated the sediment production with a mean contribution of 83 %  
577 (SD 8 %) for the 'geochemistry' model and 88 % (SD 8 %) for the 'colour + geochemistry' model.

#### 578 1.7.4. FDVS-PLSR models

579 The FDVS-PLSR models built from artificial mixture samples showed excellent theoretical  
580 predictive performances (e.g.  $r^2$ , RMSEC, RMSEC, Figure 5). However, the application of these models  
581 on river sediment samples provided questionable results. Indeed, the artificial mixture samples did  
582 not cover entirely the ranges of values found in all sources samples, thus resulting in an  
583 overestimation (i.e. superior to 100 %) and an underestimation (i.e. inferior to 0 %) of source  
584 composition (Figure 9) in several source samples. Similarly to what was previously observed, three  
585 sub-groups of mining tributary samples can be distinguished, one of which (i.e. 'Thio Upstream') is  
586 partially merged with the non-mining tributary samples (Figure 9). When modelling the source

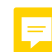



587 contributions with the FDVS-PLSR models, a bias was created because the contributions of this  
588 mining tributary may be mainly considered as the contributions of non-mining tributaries. As a result,  
589 an overestimation of non-mining tributary contributions may be found in the entire Thio River  
590 catchment and particularly in the upper part of the study area. Third, the properties measured in the  
591 Koua tributary (i.e. draining Camps des Sapins Mine) samples were not comprised in the ranges of  
592 values covered by the artificial mixture samples (Figure 9).

593         Given the particular colour signature of this tributary (Figure 11), its contributions are  
594 therefore not taken into account at all by the FDVS-PLSR models. Indeed, the sums of the source  
595 contributions by FDVS-PLSR models are lower than the expected 100% particularly in the uppermost  
596 part of the catchment (Tables 4 and 5), which may indicate that a source is not accounted for.  
597 Artificial mixtures were constructed from a homogenized spectral signature of all mining source  
598 samples. However, two distinct spectral signatures were observed between the upstream and  
599 downstream mining source samples. Homogenizing the spectral signature of the mining samples led  
600 to a loss of information in terms of spectral signature, in particular that of the mining samples  
601 located upstream. As a result, a 3-source FDVS-PLSR models (i.e. non-mining, upstream and  
602 downstream mining sources) would have been more appropriate than 2-source FDVS-PLSR models in  
603 this context.

#### 604 **1.8.Spatial and temporal variations of sediment source contributions**

605         Among the four models tested in this study, the 'colour + geochemistry' model is the most  
606 appropriate to estimate mining and non-mining tributary contributions in the Thio River catchment.  
607 According to the results of this model, mining tributaries provided the main sediment supply to the  
608 river system with a mean contribution of 68 % (SD 25 %) for the 2015 flood event and 88 % (SD 8 %)  
609 for the 2017 flood event (Tables 4 and 5). The variability of mining tributary contributions between  
610 these two flood events with a return period of 10 years ( $3500 \text{ m}^3 \text{ s}^{-1}$ ) could be explained in particular  
611 by the variability of rainfall distribution (Sellier et al., 2019). Indeed, during the 2015 flood event, the



612 Kouaré River sub-catchment received twice the rainfall than observed in the rest of the Thio River  
613 catchment, which may explain a higher contribution of non-mining tributaries for this event than for  
614 the 2017 flood event where rainfall was more intense on the eastern part of the catchment in the  
615 vicinity of the mines currently in operation (Thio Plateau, Camps des Sapins).

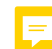

616 Although the FDVS-PLSR models were unable to properly estimate the source contributions,  
617 they provided qualitative indications about the proportion of sediment contribution between  
618 'Upstream' and 'Downstream' mining tributaries at the level of the estuary. Indeed, only  
619 'downstream' mining tributaries were finally identified by the FDVS-PLSR models as mining sources.  
620 Mining contributions gradually increased in downstream direction. The predicted proportion sums of  
621 river sediment samples also tend to reach the expected 100%, which could result in a better  
622 predictability of the models. As a result, these models indicated that sediment contribution from  
623 downstream reaches dominated that of upstream reaches at the level of the estuary for both events.

624 Moreover, the analysis of colour parameters coupled to that of geochemical elements  
625 highlighted the occurrence of three sub-groups of mining tributary samples, (1) 'Downstream'  
626 samples characterized by high  $a^*$  values and low K contents, (2) 'Koua tributary' samples located in  
627 the upstream characterized by low  $a^*$  values and low K contents and (3) 'Thio upstream' samples  
628 corresponding to a mix of both dominant lithologies (i.e. peridotite massifs and volcano-sedimentary  
629 formations) characterized by low  $a^*$  values and higher K contents (i.e. 4 times higher than for the  
630 two previous sub-groups) (Figure 11). Owing to the low K contents found in Thio River sediment  
631 samples collected in the uppermost part (i.e.  $\sim 2200 \text{ mg kg}^{-1}$  in 2015 and  $\sim 2600 \text{ mg kg}^{-1}$  in 2017),  
632 which were similar to those measured in samples of sub-group (2,  $\sim 2400 \text{ mg kg}^{-1}$ ), it would appear  
633 that the Koua tributary draining Camps des Sapins mine dominated the sediment supply in the  
634 upstream for both events.

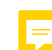

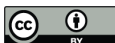

635 Conclusions

636 The current study showed that the contributions of mining sources dominated the sediment  
637 inputs with mean contributions of 68 % (SD 25 %) for the 2015 flood event and 88 % (SD 8 %) for the  
638 2017 flood event (results of 'colour + geochemistry' model). Although the spatial variability of rainfall  
639 may impact local sediment source contributions, a trend in terms of sediment source contributions is  
640 observed along the Thio River for both flood events. In the uppermost part of the catchment, mining  
641 source contributions dominated (99% in 2015, 100% in 2017) with a dominant contribution from the  
642 Koua tributary draining the Camps des Sapins mine. The first non-mining tributary encountered in  
643 downstream direction (i.e. the Kouergoa tributary) contributed little to sediment supply; it is rather  
644 the next non-mining tributaries (i.e. the Kouaré tributary) which provided most of the sediment  
645 inputs (83 % in 2015, 26 % in 2017). Nevertheless, these contributions were compensated in  
646 downstream direction by those from mining sources generated by tributaries draining Thio Plateau  
647 mine. Finally, at the estuary, mining sources dominated (58-70% in 2015, 83-85 % in 2017). These  
648 results therefore suggest that catchment management should focus on mining tributaries draining  
649 active mining sites (i.e. Camps des Sapins and the Thio Plateau).

650 One of the objectives of this study was to evaluate the performance of sediment tracing  
651 methods based on spectroscopy measurements (i.e. colour parameters and FDVS). The results  
652 showed that these individual fingerprinting approaches did not provide sufficient discrimination  
653 between sources to be used for the modelling of sediment source contributions. Nevertheless, the  
654 inclusion of colour properties in addition to geochemical parameters turned out to be the optimal  
655 combination of tracers providing the highest discrimination between sediment sources. This 'colour +  
656 geochemistry' model is, however largely based on the discriminatory power provided by K, which  
657 means that the 'geochemistry' approach is also relevant to quantify sediment sources. Both  
658 approaches have, moreover, been experimentally validated. As a result, the use of these approaches  
659 could be extended to other mining catchments of New Caledonia but also to other similar nickel





660 mining catchments (i.e. Ni oxidized ores based on peridotite massifs) around the world (e.g.  
661 Australia, Brazil, Dominican Republic, Cuba).

#### 662 **Data availability**

663 The database has been registered on the PANGAEA website and is currently undergoing the editorial  
664 process: <https://issues.pangaea.de/browse/PDI-25229>.

#### 665 **Author contribution**

666 Oldrich Navratil, Michel Allenbach and Olivier Evrard designed research. Virginie Sellier, Oldrich  
667 Navratil, Olivier Evrard and Irène Lefèvre carried out fieldwork sampling. Virginie Sellier conducted the  
668 analyses. All co-authors contributed to data analysis and interpretation. John Patrick Laceby  
669 contributed to modelling. All co-authors contributed to the writing and approved the final version of  
670 the manuscript.

#### 671 **Competing interests**

672 The authors declare that they have no conflict of interest.

#### 673 **Acknowledgements**

674 This work was funded by the National Technical Research Center (CNRT) “Nickel and Its  
675 Environment”, Noumea, New Caledonia » (n°10PS2013-CNRT.UNC/IMMILA). The PhD project of  
676 Virginie Sellier is also financed by the French Atomic Energy Commission (CEA, Commissariat à  
677 l’Energie Atomique et aux Energies Alternatives). The authors are grateful to Jean-Guy M’Boueri,  
678 Pierre Chanel, Jean-Jean, Lorenza M’Boueri, Nicolle Mathys for their invaluable support to identify  
679 and have access to the field sampling sites.

680



## 681 References

- 682 Abel, A., Michael, A., Zartl, A., and Werner, F.: Impact of erosion-transported overburden dump  
683 materials on water quality in Lake Cospuden evolved from a former open cast lignite mine south of  
684 Leipzig, Germany, *Environmental Geology*, 39, 683-688, 2000.
- 685 Baudrimont, M., Dominique, Y., Feurtet-Mazel, A., Gonzalez, P., Gourvès, P.-Y., Gunkel-Grillon, P.,  
686 Laporte-Magoni, C., Lefrançois, E., Letourneur, Y., Marquié, J., Maury-Brachet, R., Monna, F.,  
687 Pasquet, C., Rivière, E., and Roth, E.: - Rapport scientifique final. Programme « Dispersion des métaux  
688 de la mine au lagon. ». CNRT « Nickel & son environnement ». 192 pages, 2019.
- 689 Bird, E. C. F., Dubois, J. P., and Iltis, J. A.: The impacts of opencast mining on the rivers and coasts of  
690 New Caledonia. Tokyo, Japan, United Nations University, 1984.
- 691 Blake, W. H., Wallbrink, P. J., Wilkinson, S. N., Humphreys, G. S., Doerr, S. H., Shakesby, R. A., and  
692 Tomkins, K. M.: Deriving hillslope sediment budgets in wildfire-affected forests using fallout  
693 radionuclide tracers, *Geomorphology*, 104, 105-116, 10.1016/j.geomorph.2008.08.004, 2009.
- 694 Bradley, S., and Lewin, J.: Transport of heavy metals on suspended sediments under high flow  
695 conditions in a mineralised region of Wales, *Environmental Pollution Series B, Chemical and Physical*,  
696 4, 257-267, 1982.
- 697 Brosinsky, A., Foerster, S., Segl, K., and Kaufmann, H.: Spectral fingerprinting: sediment source  
698 discrimination and contribution modelling of artificial mixtures based on VNIR-SWIR spectral  
699 properties, *Journal of soils and sediments*, 14, 1949-1964, 2014.
- 700 Collins, A., Walling, D., and Leeks, G.: Use of the geochemical record preserved in floodplain deposits  
701 to reconstruct recent changes in river basin sediment sources, *Geomorphology*, 19, 151-167, 1997.
- 702 Collins, A. L., Walling, D. E., and Leeks, G. J. L.: Composite fingerprinting of the spatial source of fluvial  
703 suspended sediment : a case study of the Exe and Severn river basins, United Kingdom,  
704 *Géomorphologie*, 2, 41-53, 10.3406/morfo.1996.877, 1996.
- 705 Danloux, J., and Laganier, R.: Classification et quantification des phénomènes d'érosion, de transport  
706 et de sédimentation sur les bassins touchés par l'exploitation minière en Nouvelle Calédonie, 1991.
- 707 Daszykowski, M., Walczak, B., and Massart, D.: Representative subset selection, *Analytica chimica*  
708 *acta*, 468, 91-103, 2002.
- 709 Debret, M., Sebag, D., Desmet, M., Balsam, W., Copard, Y., Mourier, B., Susperrigui, A.-S., Arnaud, F.,  
710 Bentaleb, I., and Chapron, E.: Spectrocolorimetric interpretation of sedimentary dynamics: the new  
711 "Q7/4 diagram", *Earth-Science Reviews*, 109, 1-19, 2011.
- 712 Dumas, P., Printemps, J., Mangeas, M., and Luneau, G.: Developing erosion models for integrated  
713 coastal zone management: A case study of The New Caledonia west coast, *Marine Pollution Bulletin*,  
714 61, 519-529, 2010.
- 715 Evrard, O., Lacey, J. P., Huon, S., Lefèvre, I., Sengtaheuanghoung, O., and Ribolzi, O.: Combining  
716 multiple fallout radionuclides ( $^{137}\text{Cs}$ ,  $^7\text{Be}$ ,  $^{210}\text{Pbxs}$ ) to investigate temporal sediment source  
717 dynamics in tropical, ephemeral riverine systems, *J Soils Sediments*, 16, 1130-1144, 10.1007/s11368-  
718 015-1316-y, 2015.
- 719 Evrard, O., Durand, R., Foucher, A., Tiecher, T., Sellier, V., Onda, Y., Lefèvre, I., Cerdan, O., and  
720 Lacey, J. P.: Using spectrocolourimetry to trace sediment source dynamics in coastal catchments  
721 draining the main Fukushima radioactive pollution plume (2011–2017), *Journal of Soils and*  
722 *Sediments*, 1-12, 2019.
- 723 Evrard, O., Chaboche, P.-A., Ramon, R., Foucher, A., and Lacey, J. P.: A global review of sediment  
724 source fingerprinting research incorporating fallout radiocesium ( $^{137}\text{Cs}$ ), *Geomorphology*, 107103,  
725 2020.
- 726 Garcin, M.: Exploitation des granulats en lit vif des cours d'eau de la Grande-Terre, Nouvelle-  
727 Calédonie. BRGM/RP-58531-FR. 114 p., 90 fig., 3 tabl., Bureau des Recherches Géologiques et  
728 Minières 2010.



- 729 Garcin, M., Gastaldi, Y., and Lesimple, S.: Quantification et évolution temporelle des apports miniers  
730 dans les rivières calédoniennes. BRGM/RP-66840-FR, 44 p., 23 fig., 5, Bureau des Recherches  
731 Géologiques et Minières
- 732 2017.
- 733 Hedouin, L., Pringault, O., Metian, M., Bustamante, P., and Warnau, M.: Nickel bioaccumulation in  
734 bivalves from the New Caledonia lagoon: Seawater and food exposure, *Chemosphere*, 66, 1449-1457,  
735 2007.
- 736 Highley, D., Chapman, G. R., and Bonel, K.: The economic importance of minerals to the UK, British  
737 Geological Survey, 2004.
- 738 Iltis, J.: La mine, élément de la controverse écologique dans le Pacifique Sud, *L'Espace géographique*,  
739 193-205, 1992.
- 740 Juillot, F.: – Rapport scientifique final. Programme « Dynamique des métaux de la mine au lagon ». CNRT  
741 « Nickel & son environnement ». 202 pages., 2019.
- 742 Klages, M., and Hsieh, Y.: Suspended Solids Carried by the Gallatin River of Southwestern Montana:  
743 II. Using Mineralogy for Inferring Sources 1, *Journal of Environmental Quality*, 4, 68-73, 1975.
- 744 Laceby, J. P., and Olley, J.: An examination of geochemical modelling approaches to tracing sediment  
745 sources incorporating distribution mixing and elemental correlations, *Hydrol. Process.*, 29, 1669-  
746 1685, 10.1002/hyp.10287, 2015.
- 747 Laceby, J. P., Evrard, O., Smith, H. G., Blake, W. H., Olley, J. M., Minella, J. P. G., and Owens, P. N.: The  
748 challenges and opportunities of addressing particle size effects in sediment source fingerprinting: A  
749 review, *Earth-Sci. Rev.*, 169, 85-103, 10.1016/j.earscirev.2017.04.009, 2017.
- 750 Legout, C., Poulénard, J., Nemery, J., Navratil, O., Grangeon, T., Evrard, O., and Esteves, M.:  
751 Quantifying suspended sediment sources during runoff events in headwater catchments using  
752 spectrophotometry, *J Soils Sediments*, 13, 1478-1492, 10.1007/s11368-013-0728-9, 2013.
- 753 Mardhel, V., Iseppi, M., Regninger, P. A., and Sevin, B.: Connaissance de l'ophiolite, géophysique  
754 aéroportée et étude de la structure. Rapport scientifique final. Programme «OPHIOSTRUCT». CNRT  
755 «Nickel & son environnement», 2018.
- 756 Martínez-Carreras, N., Udelhoven, T., Krein, A., Gallart, F., Iffly, J. F., Ziebel, J., Hoffmann, L., Pfister,  
757 L., and Walling, D. E.: The use of sediment colour measured by diffuse reflectance spectrometry to  
758 determine sediment sources: application to the Atert River catchment (Luxembourg), *J Hydrol*, 382,  
759 49-63, 2010.
- 760 Pascal, N.: Ecosystèmes coralliens de Nouvelle-Calédonie. Valeur économique des services  
761 écosystémiques. Partie I: Valeur financière. IFRECOR., 2010.
- 762 Poulénard, J., Perrette, Y., Fanget, B., Quetin, P., Trevisan, D., and Dorioz, J.-M.: Infrared  
763 spectroscopy tracing of sediment sources in a small rural watershed (French Alps), *Science of the*  
764 *Total Environment*, 407, 2808-2819, 2009.
- 765 Poulénard, J., Legout, C., Nemery, J., Bramorski, J., Navratil, O., Douchin, A., Fanget, B., Perrette, Y.,  
766 Evrard, O., and Esteves, M.: Tracing sediment sources during floods using Diffuse Reflectance  
767 Infrared Fourier Transform Spectrometry (DRIFTS): A case study in a highly erosive mountainous  
768 catchment (Southern French Alps), *Journal of Hydrology*, 414, 452-462, 2012.
- 769 Prior, T., Daly, J., Mason, L., and Giurco, D.: Resourcing the future: Using foresight in resource  
770 governance, *Geoforum*, 44, 316-328, 2013.
- 771 Rossel, R. V., Walvoort, D., McBratney, A., Janik, L. J., and Skjemstad, J.: Visible, near infrared, mid  
772 infrared or combined diffuse reflectance spectroscopy for simultaneous assessment of various soil  
773 properties, *Geoderma*, 131, 59-75, 2006.
- 774 Sellier, V., Navratil, O., Laceby, J. P., Allenbach, M., Lefèvre, I., and Evrard, O.: Investigating the use of  
775 fallout and geogenic radionuclides as potential tracing properties to quantify the sources of  
776 suspended sediment in a mining catchment in New Caledonia, South Pacific, *Journal of Soils and*  
777 *Sediments*, 1-17, 2019.



778 Shellberg, J., Brooks, A., and Spencer, J.: Land-use change from indigenous management to cattle  
779 grazing initiates the gulying of alluvial soils in northern Australia, 19th World Congress of Soil  
780 Science: Soil Solutions for a Changing World, 2010, 1-6,  
781 Sherriff, S. C., Franks, S. W., Rowan, J. S., Fenton, O., and Ó'hUallacháin, D.: Uncertainty-based  
782 assessment of tracer selection, tracer non-conservativeness and multiple solutions in sediment  
783 fingerprinting using synthetic and field data, *J Soils Sediments*, 15, 2101-2116, 10.1007/s11368-015-  
784 1123-5, 2015.  
785 Smith, H. G., Sheridan, G. J., Lane, P. N. J., Noske, P. J., and Heijnis, H.: Changes to sediment sources  
786 following wildfire in a forested upland catchment, southeastern Australia, *Hydrol. Process.*, 25, 2878-  
787 2889, 10.1002/hyp.8050, 2011.  
788 Surell, A.: Étude sur les torrents des Hautes-Alpes, Carilian-Goeury, 1841.  
789 Tiecher, T., Caner, L., Minella, J. P., and dos Santos, D. R.: Combining visible-based-color parameters  
790 and geochemical tracers to improve sediment source discrimination and apportionment, *Sci Total*  
791 *Environ*, 527-528, 135-149, 10.1016/j.scitotenv.2015.04.103, 2015.  
792 Uber, M., Legout, C., Nord, G., Crouzet, C., Demory, F., and Poulénard, J.: Comparing alternative  
793 tracing measurements and mixing models to fingerprint suspended sediment sources in a mesoscale  
794 Mediterranean catchment, *Journal of Soils and Sediments*, 1-19, 2019.  
795 Vaithyanathan, P., Ramanathan, A., and Subramanian, V.: Transport and distribution of heavy metals  
796 in Cauvery River, *Water, Air, and Soil Pollution*, 71, 13-28, 1993.  
797 Walden, J., Slattery, M. C., and Burt, T. P.: Use of mineral magnetic measurements to fingerprint  
798 suspended sediment sources: approaches and techniques for data analysis, *Journal of Hydrology*,  
799 202, 353-372, 1997.  
800 Wallbrink, P., Murray, A., Olley, J., and Olive, L.: Determining sources and transit times of suspended  
801 sediment in the Murrumbidgee River, New South Wales, Australia, using fallout <sup>137</sup>Cs and <sup>210</sup>Pb,  
802 *Water Resour Res*, 34, 879-887, 1998.  
803 Wallbrink, P. J.: Quantifying the erosion processes and land-uses which dominate fine sediment  
804 supply to Moreton Bay, Southeast Queensland, Australia, *Journal of environmental radioactivity*, 76,  
805 67-80, 2004.  
806 Walling, D., Peart, M., Oldfield, F., and Thompson, R.: Suspended sediment sources identified by  
807 magnetic measurements, *Nature*, 281, 110, 1979.  
808 Yellishetty, M., Mudd, G. M., and Shukla, R.: Prediction of soil erosion from waste dumps of opencast  
809 mines and evaluation of their impacts on the environment, *International Journal of Mining,*  
810 *Reclamation and Environment*, 27, 88-102, 2013.

811
